# Supplementary material
Source: PubMed Central journal article supplement (PMC5617139)
Supplement: NIHMS897700-supplement-Supplemental_materials.pdf [file NIHMS897700-supplement-Supplemental_materials.pdf]

## Supplementary Online Content

Mokdad AH, Dwyer-Lindgren L, Fitzmaurice C, et al. Trends and patterns of disparities in cancer mortality among US counties, 1980-2014. *JAMA*. doi:10.1001/jama.2016.20324

- eFigure 1.** County-level mortality from lip and oral cavity cancer
- eFigure 2.** County-level mortality from nasopharynx cancer
- eFigure 3.** County-level mortality from other pharynx cancer
- eFigure 4.** County-level mortality from esophageal cancer
- eFigure 5.** County-level mortality from stomach cancer
- eFigure 6.** County-level mortality from gallbladder and biliary tract cancer
- eFigure 7.** County-level mortality from larynx cancer
- eFigure 8.** County-level mortality from malignant skin melanoma
- eFigure 9.** County-level mortality from non-melanoma skin cancer
- eFigure 10.** County-level mortality from cervical cancer
- eFigure 11.** County-level mortality from ovarian cancer
- eFigure 12.** County-level mortality from bladder cancer
- eFigure 13.** County-level mortality from brain and nervous system cancer
- eFigure 14.** County-level mortality from thyroid cancer
- eFigure 15.** County-level mortality from mesothelioma
- eFigure 16.** County-level mortality from Hodgkin lymphoma
- eFigure 17.** County-level mortality from multiple myeloma
- eFigure 18.** County-level mortality from leukemia
- eFigure 19.** County-level mortality from acute lymphoid leukemia
- eFigure 20.** County-level mortality from chronic lymphoid leukemia
- eFigure 21.** County-level mortality from acute myeloid leukemia
- eFigure 22.** County-level mortality from chronic myeloid leukemia
- eFigure 23.** County-level mortality from other neoplasms
- eTable 1.** Data sources used for covariates
- eTable 2.** GBD cause list and associated ICD9 and ICD10 codes
- eTable 3.** Five-year relative survival, 1973-2013, by age group
- eTable 4.** Counties with the lowest and highest age-standardized mortality rate in 2014, by cause of death

This supplementary material has been provided by the authors to give readers additional information about their work.

© 2017 American Medical Association. All rights reserved.

## eFigures

- eFigure 1: County-level mortality from lip and oral cavity cancer
- eFigure 2: County-level mortality from nasopharynx cancer
- eFigure 3: County-level mortality from other pharynx cancer
- eFigure 4: County-level mortality from esophageal cancer
- eFigure 5: County-level mortality from stomach cancer
- eFigure 6: County-level mortality from gallbladder and biliary tract cancer
- eFigure 7: County-level mortality from larynx cancer
- eFigure 8: County-level mortality from malignant skin melanoma
- eFigure 9: County-level mortality from non-melanoma skin cancer
- eFigure 10: County-level mortality from cervical cancer
- eFigure 11: County-level mortality from ovarian cancer
- eFigure 12: County-level mortality from bladder cancer
- eFigure 13: County-level mortality from brain and nervous system cancer
- eFigure 14: County-level mortality from thyroid cancer
- eFigure 15: County-level mortality from mesothelioma
- eFigure 16: County-level mortality from Hodgkin lymphoma
- eFigure 17: County-level mortality from multiple myeloma
- eFigure 18: County-level mortality from leukemia
- eFigure 19: County-level mortality from acute lymphoid leukemia
- eFigure 20: County-level mortality from chronic lymphoid leukemia
- eFigure 21: County-level mortality from acute myeloid leukemia
- eFigure 22: County-level mortality from chronic myeloid leukemia
- eFigure 23: County-level mortality from other neoplasms

[A]

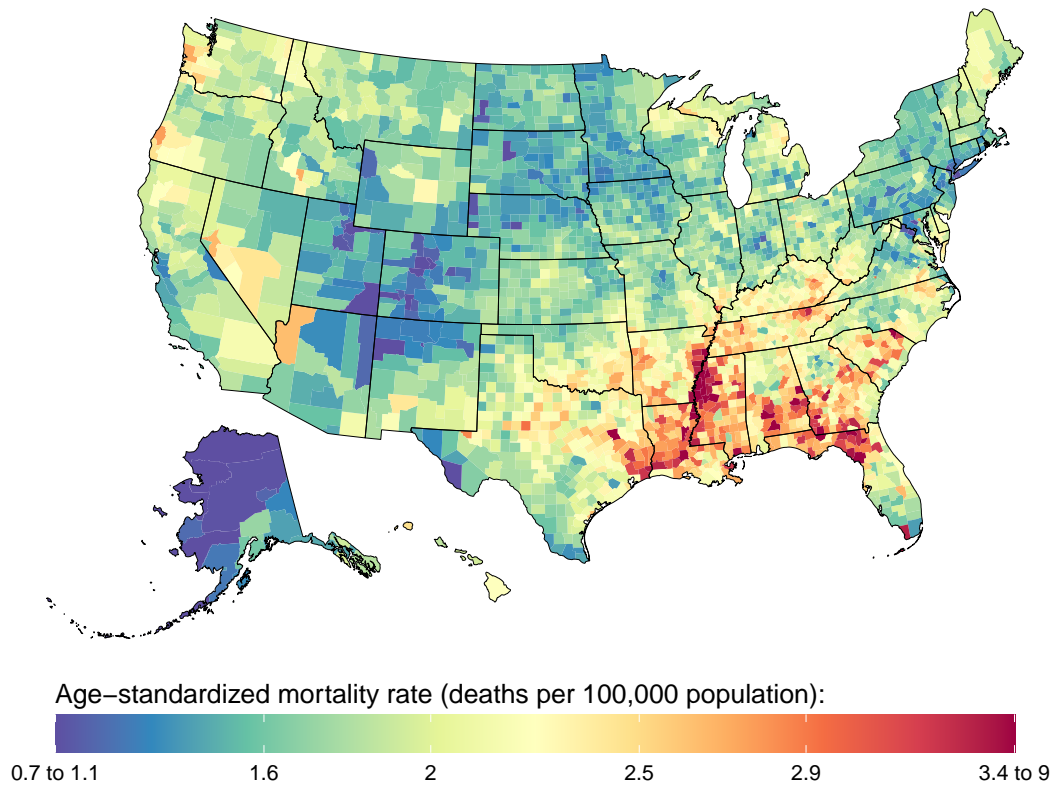

[B]

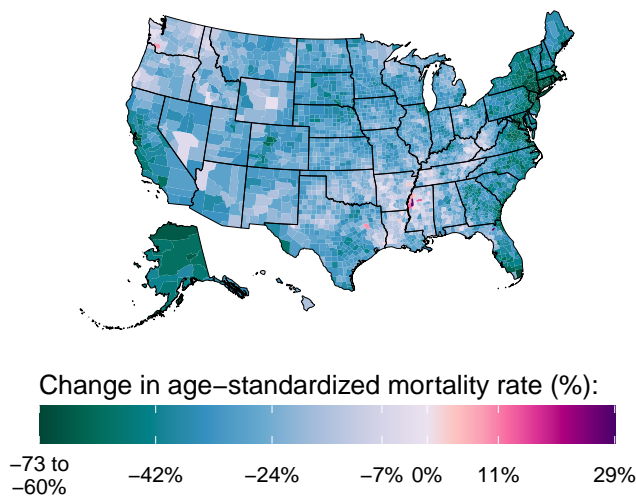

[C]

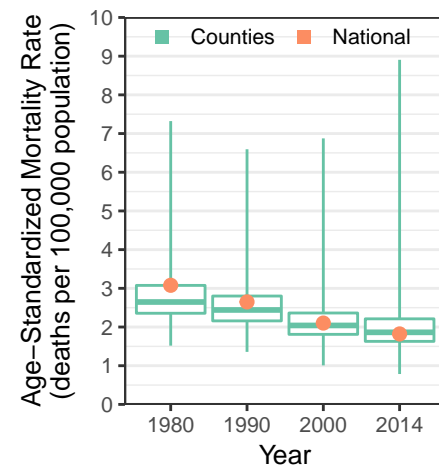

**eFigure 1: County-level mortality from lip and oral cavity cancer.** [A] Age-standardized mortality rate for both sexes combined in 2014; [B] Relative change in the age-standardized mortality rate for both sexes combined between 1980 and 2014; [C] Age-standardized mortality rate in 1980, 1990, 2000, and 2014. In panel [A], the color scale is truncated at approximately the 1st and 99th percentile as indicated by the range given in the color scale. In panel [B], the color scale is similarly truncated at the 1st percentile, but not at the 99th percentile, to avoid combining counties with decreases in the mortality rate and counties with increases in the mortality rate into a single group. In panel [C], the boxes indicate the 25th, 50th, and 75th percentile across all counties while the lines indicate the full range across counties and the dots indicate the national-level rate.

[A]

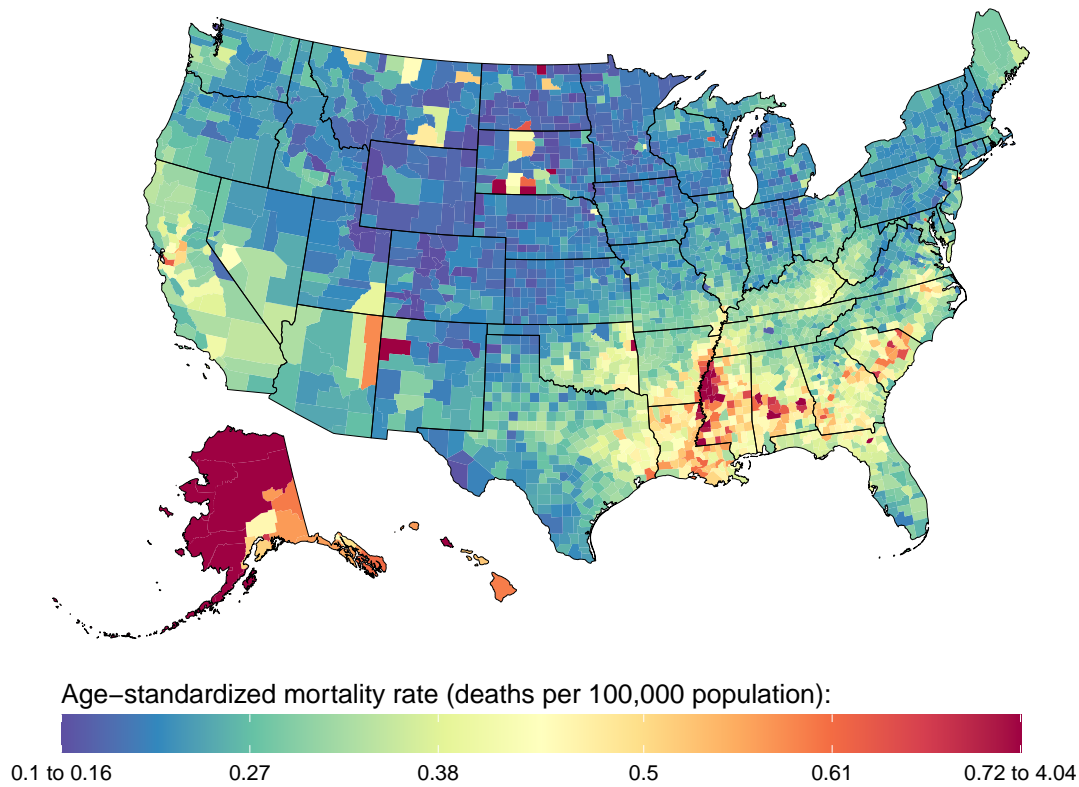

[B]

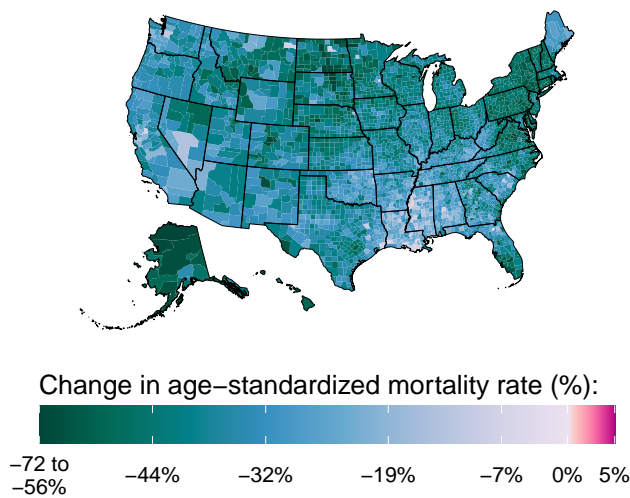

[C]

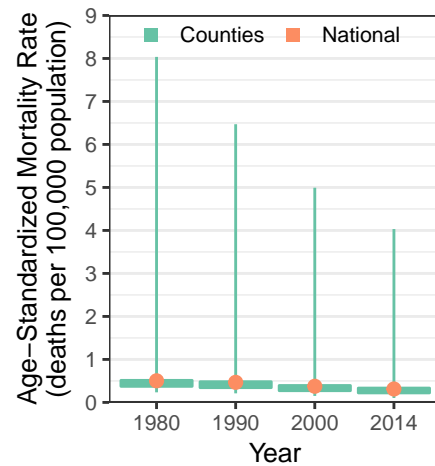

**eFigure 2: County-level mortality from nasopharynx cancer.** [A] Age-standardized mortality rate for both sexes combined in 2014; [B] Relative change in the age-standardized mortality rate for both sexes combined between 1980 and 2014; [C] Age-standardized mortality rate in 1980, 1990, 2000, and 2014. In panel [A], the color scale is truncated at approximately the 1st and 99th percentile as indicated by the range given in the color scale. In panel [B], the color scale is similarly truncated at the 1st percentile, but not at the 99th percentile, to avoid combining counties with decreases in the mortality rate and counties with increases in the mortality rate into a single group. In panel [C], the boxes indicate the 25th, 50th, and 75th percentile across all counties while the lines indicate the full range across counties and the dots indicate the national-level rate.

[A]

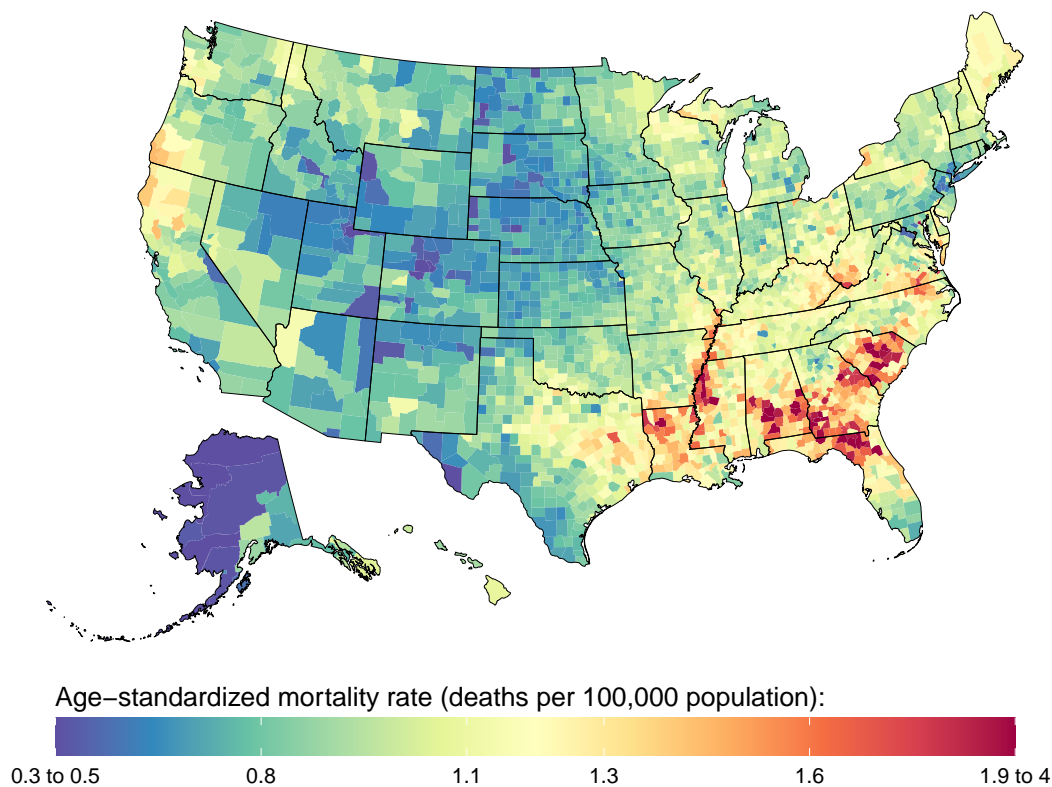

[B]

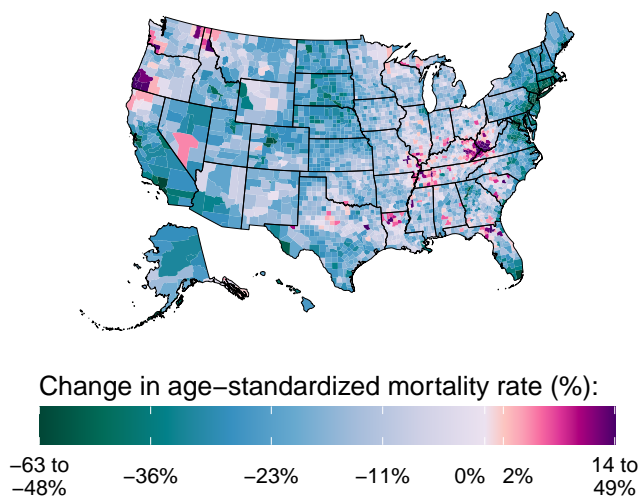

[C]

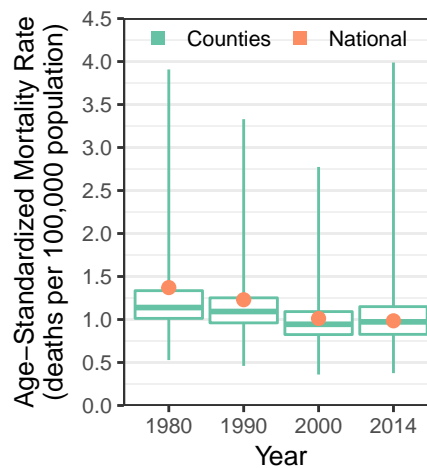

**eFigure 3: County-level mortality from other pharynx cancer.** [A] Age-standardized mortality rate for both sexes combined in 2014; [B] Relative change in the age-standardized mortality rate for both sexes combined between 1980 and 2014; [C] Age-standardized mortality rate in 1980, 1990, 2000, and 2014. In panels [A] and [B], the color scale is truncated at approximately the 1st and 99th percentile as indicated by the range given in the color scale. In panel [C], the boxes indicate the 25th, 50th, and 75th percentile across all counties while the lines indicate the full range across counties and the dots indicate the national-level rate.

[A]

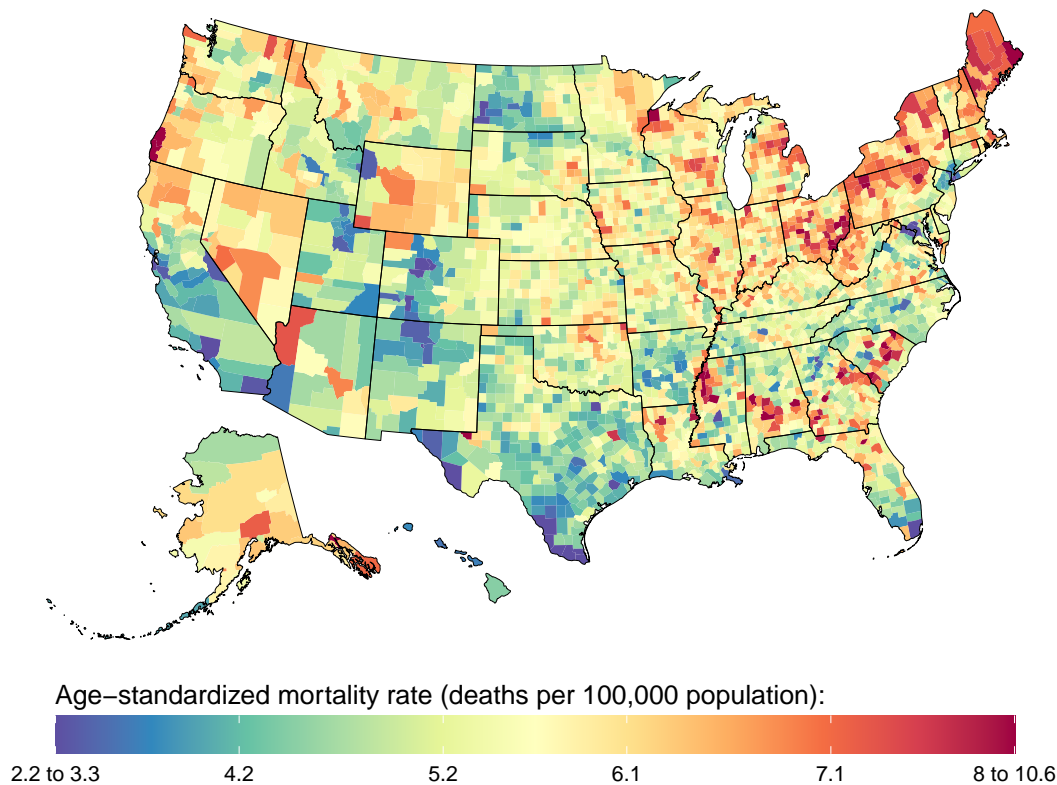

[B]

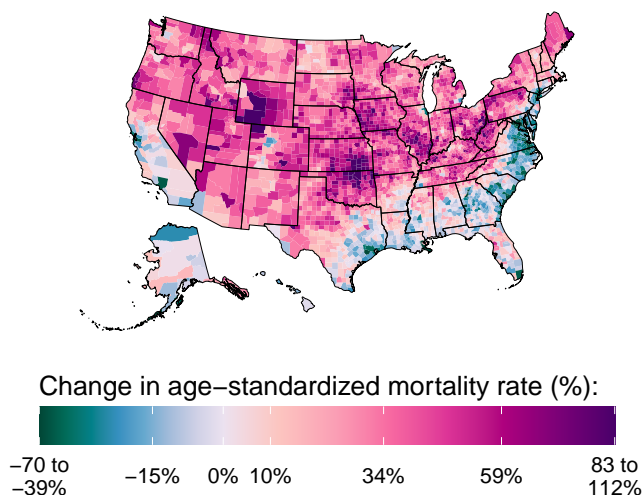

[C]

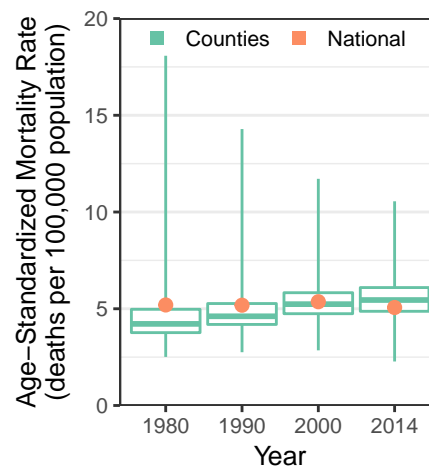

**eFigure 4: County-level mortality from esophageal cancer.** [A] Age-standardized mortality rate for both sexes combined in 2014; [B] Relative change in the age-standardized mortality rate for both sexes combined between 1980 and 2014; [C] Age-standardized mortality rate in 1980, 1990, 2000, and 2014. In panels [A] and [B], the color scale is truncated at approximately the 1st and 99th percentile as indicated by the range given in the color scale. In panel [C], the boxes indicate the 25th, 50th, and 75th percentile across all counties while the lines indicate the full range across counties and the dots indicate the national-level rate.

[A]

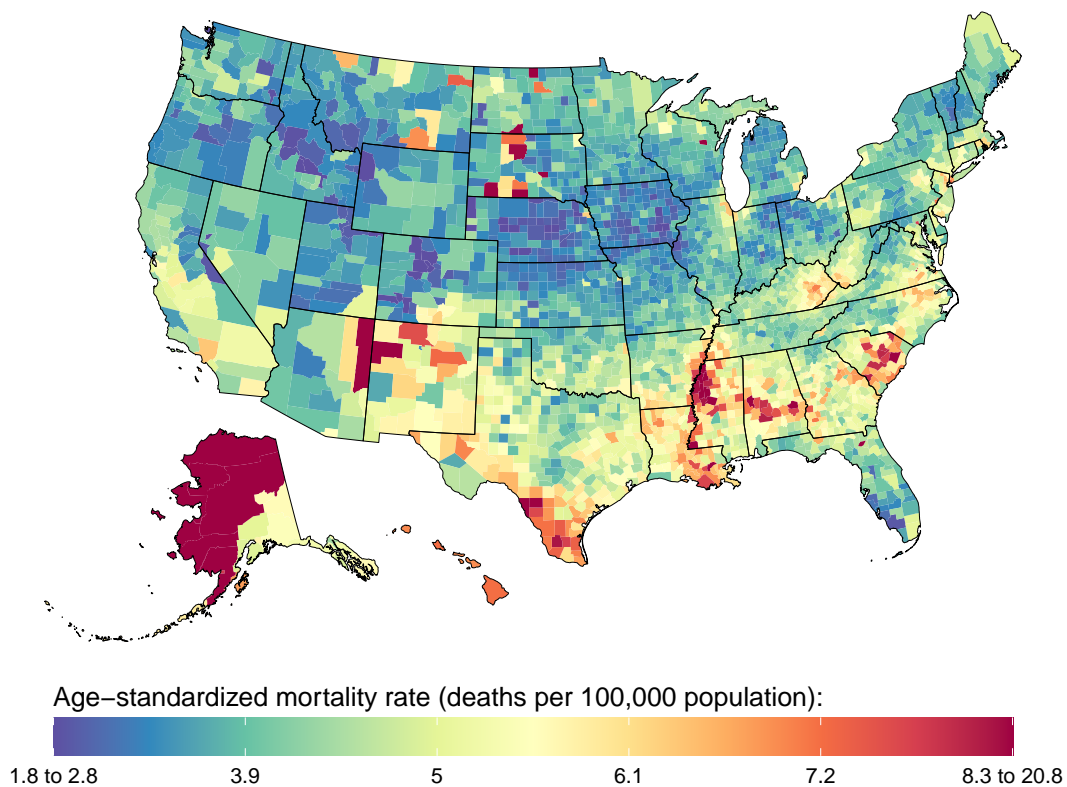

[B]

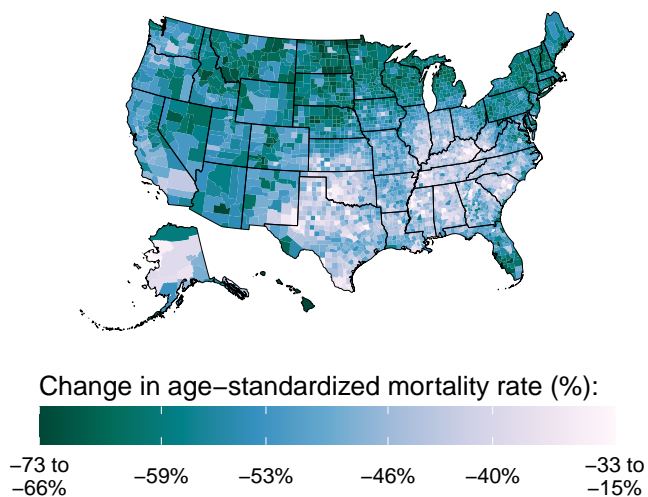

[C]

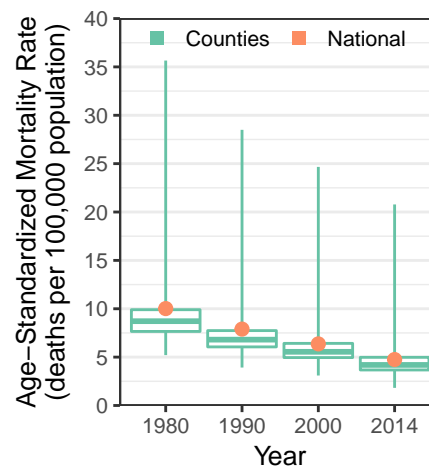

**eFigure 5: County-level mortality from stomach cancer.** [A] Age-standardized mortality rate for both sexes combined in 2014; [B] Relative change in the age-standardized mortality rate for both sexes combined between 1980 and 2014; [C] Age-standardized mortality rate in 1980, 1990, 2000, and 2014. In panels [A] and [B], the color scale is truncated at approximately the 1st and 99th percentile as indicated by the range given in the color scale. In panel [C], the boxes indicate the 25th, 50th, and 75th percentile across all counties while the lines indicate the full range across counties and the dots indicate the national-level rate.

[A]

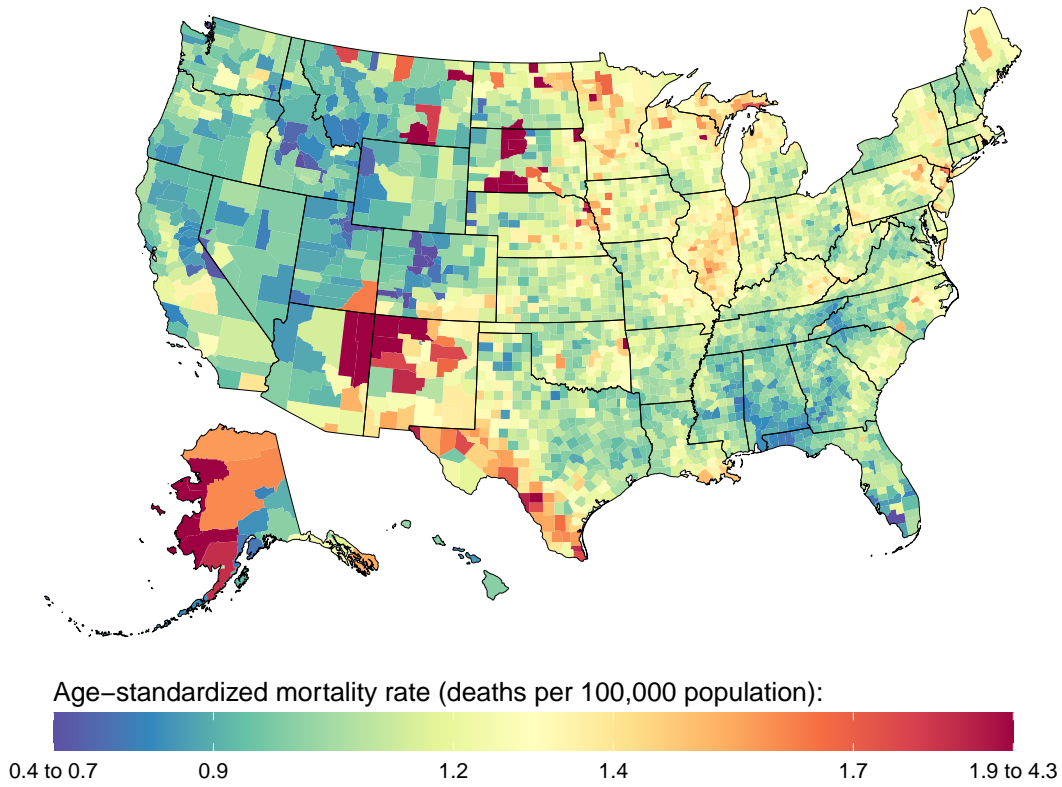

[B]

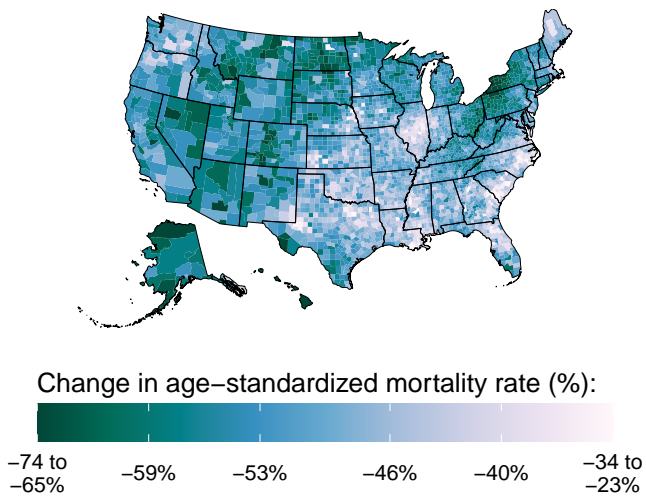

[C]

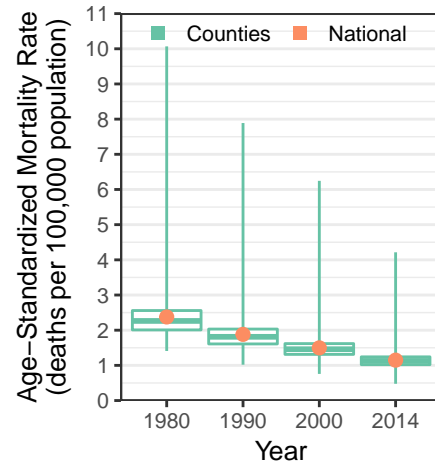

**eFigure 6: County-level mortality from gallbladder and biliary tract cancer.** [A] Age-standardized mortality rate for both sexes combined in 2014; [B] Relative change in the age-standardized mortality rate for both sexes combined between 1980 and 2014; [C] Age-standardized mortality rate in 1980, 1990, 2000, and 2014. In panels [A] and [B], the color scale is truncated at approximately the 1st and 99th percentile as indicated by the range given in the color scale. In panel [C], the boxes indicate the 25th, 50th, and 75th percentile across all counties while the lines indicate the full range across counties and the dots indicate the national-level rate.



[A]

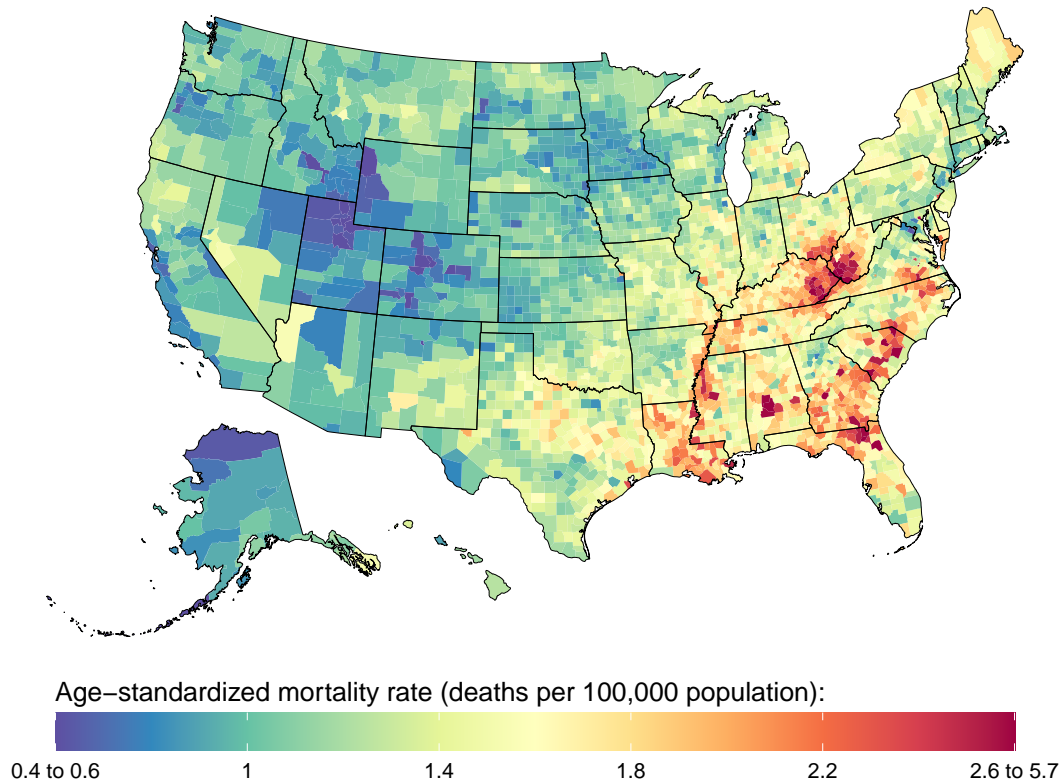

[B]

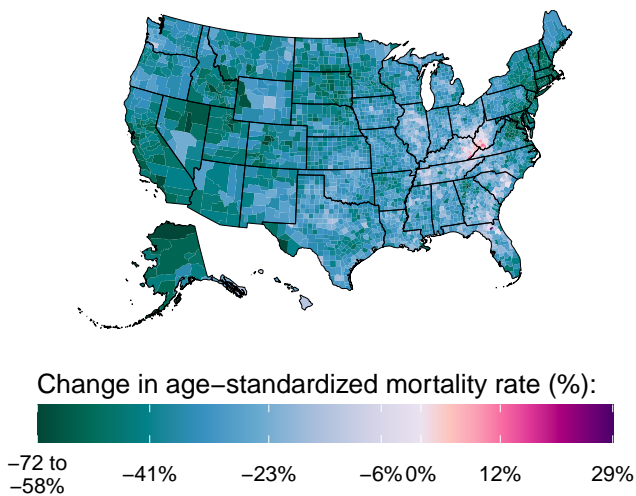

[C]

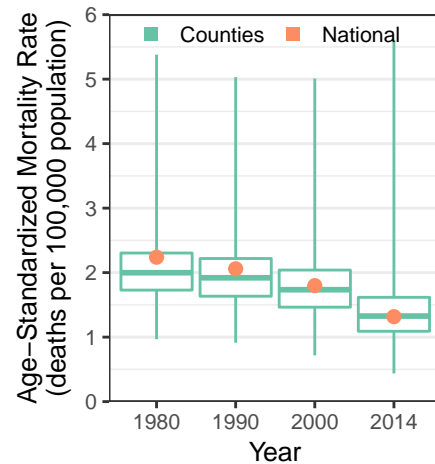

**eFigure 7: County-level mortality from larynx cancer.** [A] Age-standardized mortality rate for both sexes combined in 2014; [B] Relative change in the age-standardized mortality rate for both sexes combined between 1980 and 2014; [C] Age-standardized mortality rate in 1980, 1990, 2000, and 2014. In panel [A], the color scale is truncated at approximately the 1st and 99th percentile as indicated by the range given in the color scale. In panel [B], the color scale is similarly truncated at the 1st percentile, but not at the 99th percentile, to avoid combining counties with decreases in the mortality rate and counties with increases in the mortality rate into a single group. In panel [C], the boxes indicate the 25th, 50th, and 75th percentile across all counties while the lines indicate the full range across counties and the dots indicate the national-level rate.

[A]

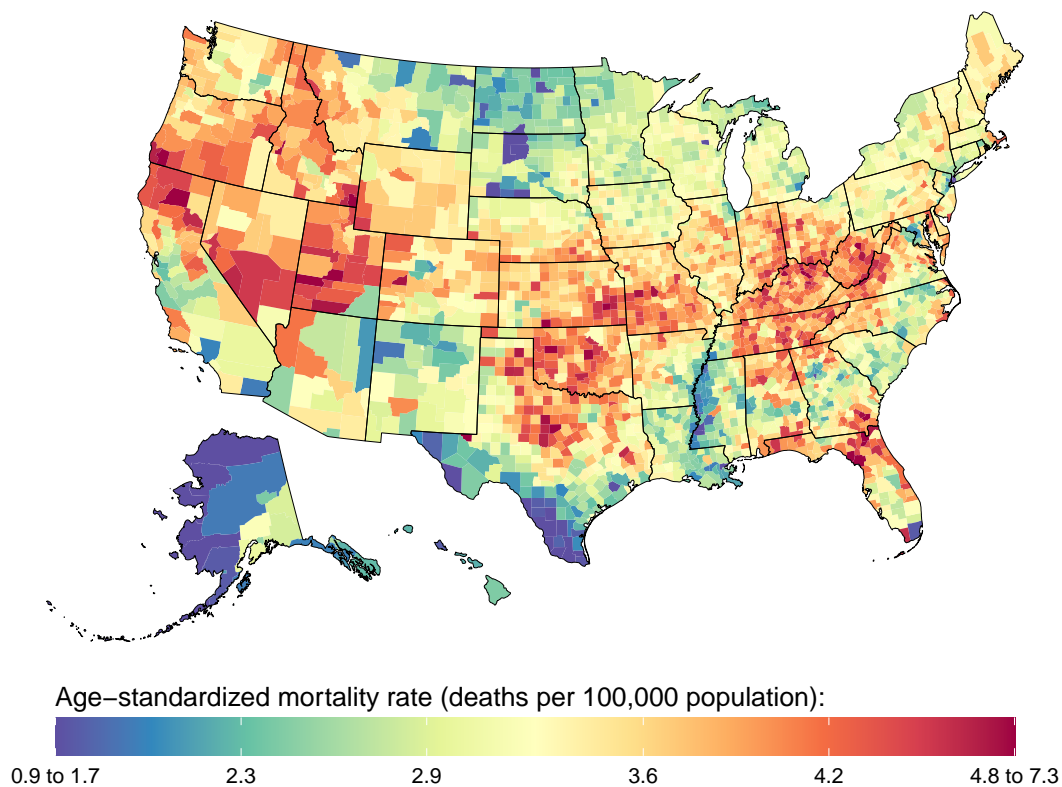

[B]

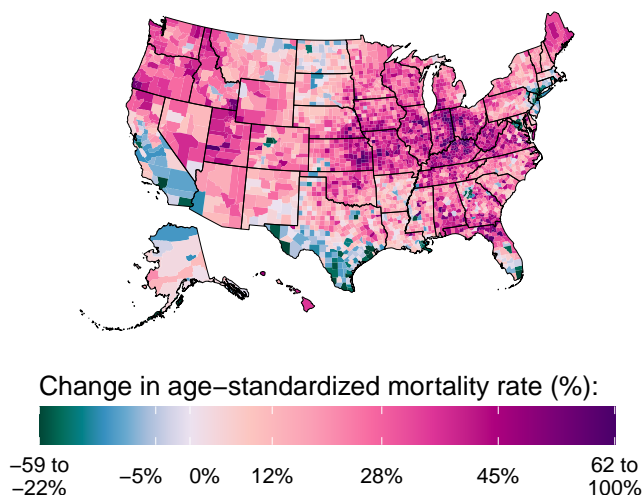

[C]

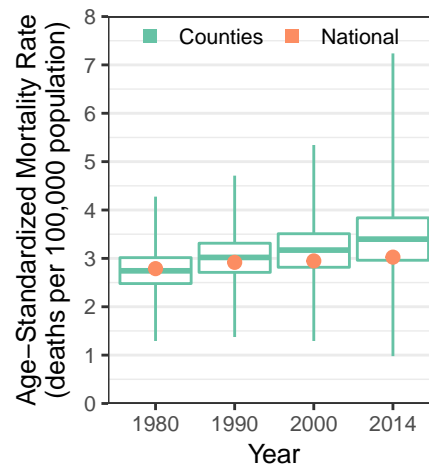

**eFigure 8: County-level mortality from malignant skin melanoma.** [A] Age-standardized mortality rate for both sexes combined in 2014; [B] Relative change in the age-standardized mortality rate for both sexes combined between 1980 and 2014; [C] Age-standardized mortality rate in 1980, 1990, 2000, and 2014. In panels [A] and [B], the color scale is truncated at approximately the 1st and 99th percentile as indicated by the range given in the color scale. In panel [C], the boxes indicate the 25th, 50th, and 75th percentile across all counties while the lines indicate the full range across counties and the dots indicate the national-level rate.

[A]

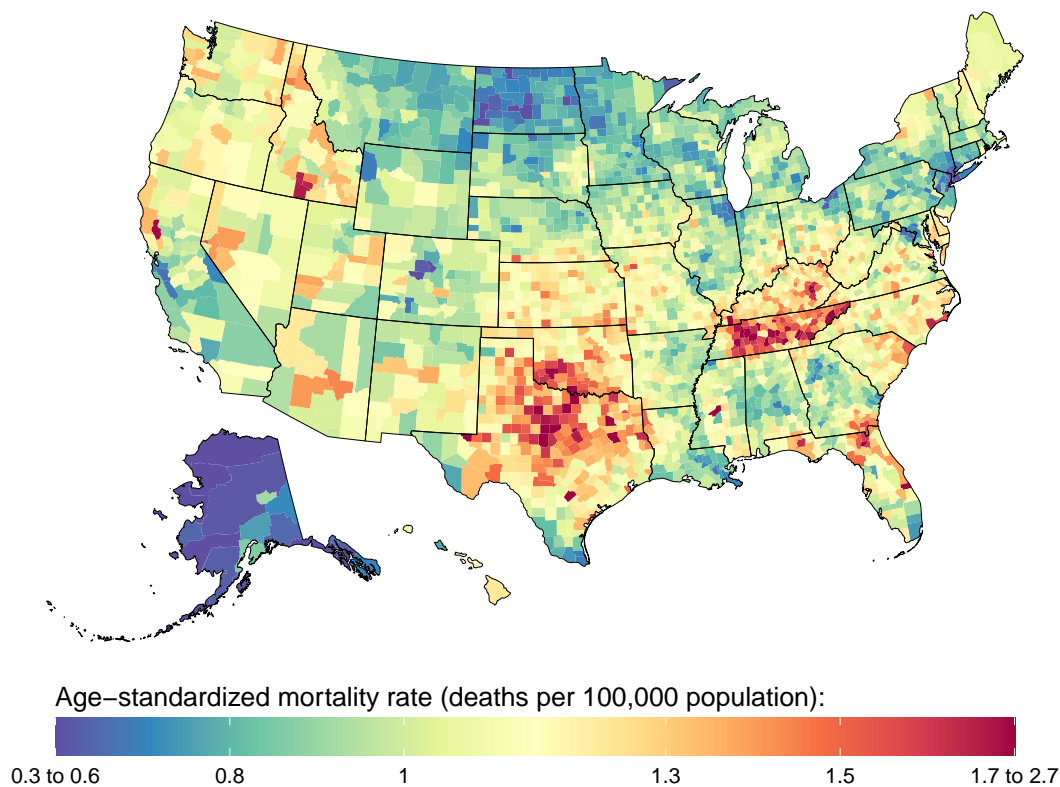

[B]

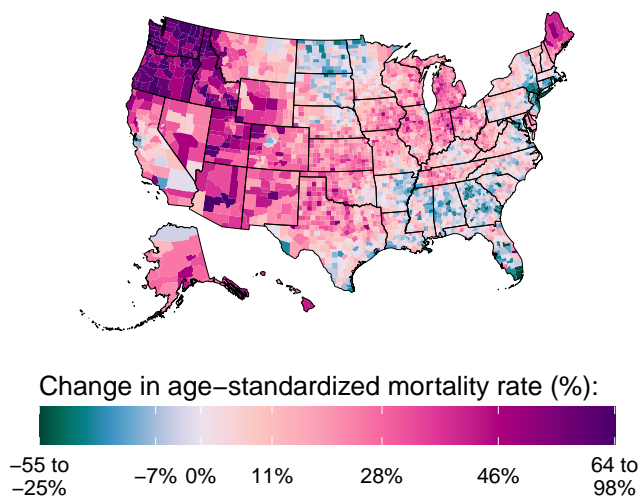

[C]

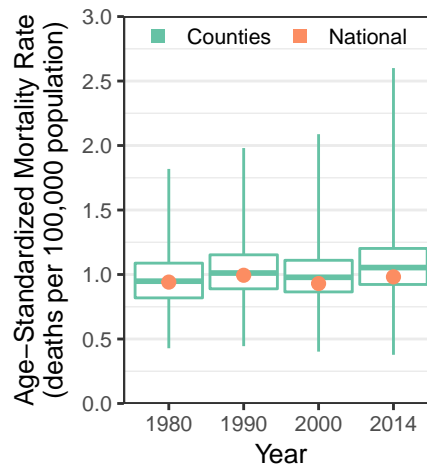

**eFigure 9: County-level mortality from non-melanoma skin cancer.** [A] Age-standardized mortality rate for both sexes combined in 2014; [B] Relative change in the age-standardized mortality rate for both sexes combined between 1980 and 2014; [C] Age-standardized mortality rate in 1980, 1990, 2000, and 2014. In panels [A] and [B], the color scale is truncated at approximately the 1st and 99th percentile as indicated by the range given in the color scale. In panel [C], the boxes indicate the 25th, 50th, and 75th percentile across all counties while the lines indicate the full range across counties and the dots indicate the national-level rate.

[A]

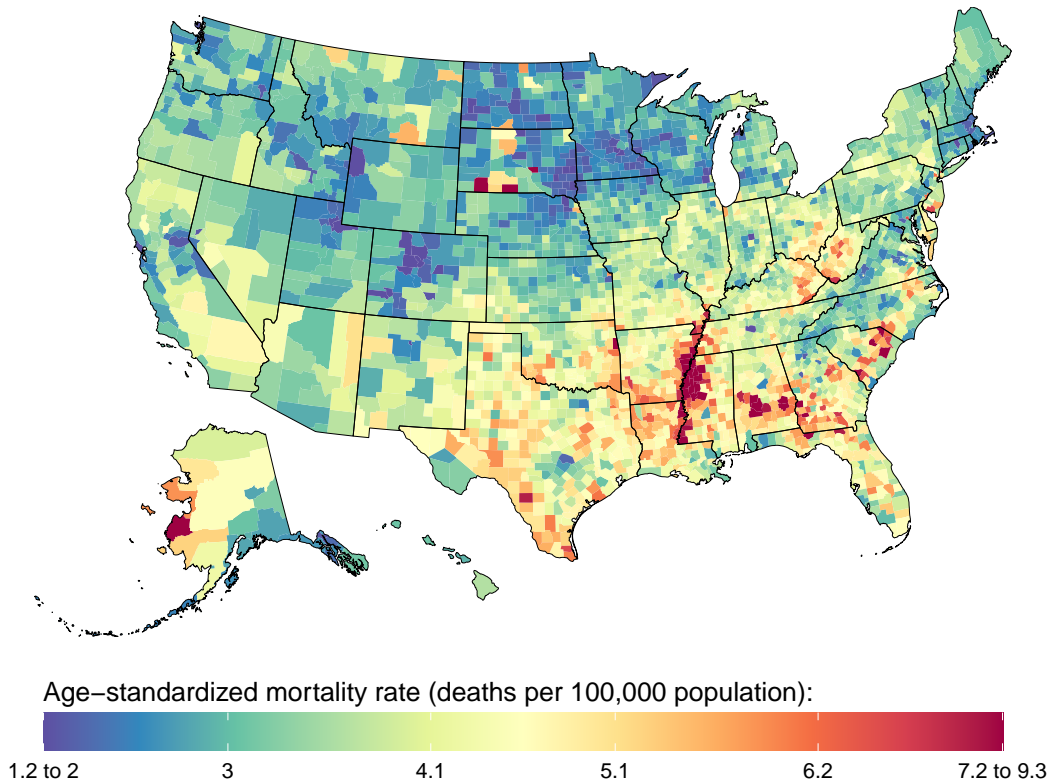

[B]

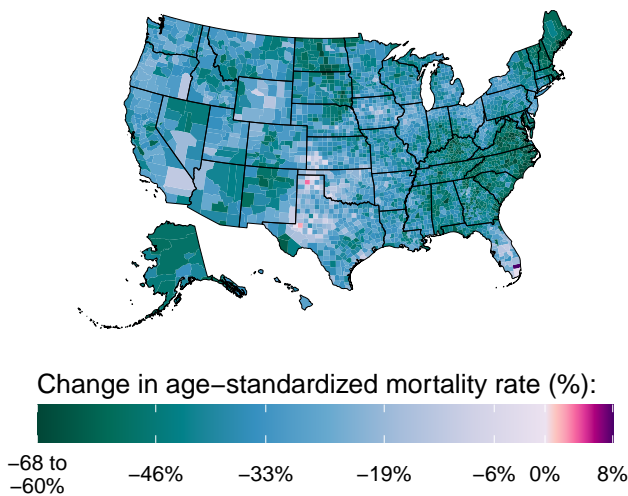

[C]

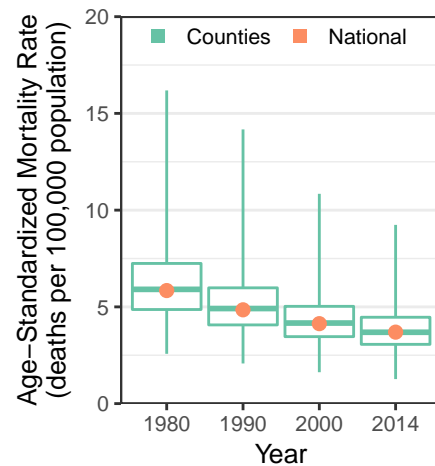

**eFigure 10: County-level mortality from cervical cancer (females only).** [A] Age-standardized mortality rate for females in 2014; [B] Relative change in the age-standardized mortality rate for females between 1980 and 2014; [C] Age-standardized mortality rate in 1980, 1990, 2000, and 2014. In panel [A], the color scale is truncated at approximately the 1st and 99th percentile as indicated by the range given in the color scale. In panel [B], the color scale is similarly truncated at the 1st percentile, but not at the 99th percentile, to avoid combining counties with decreases in the mortality rate and counties with increases in the mortality rate into a single group. In panel [C], the boxes indicate the 25th, 50th, and 75th percentile across all counties while the lines indicate the full range across counties and the dots indicate the national-level rate.

[A]

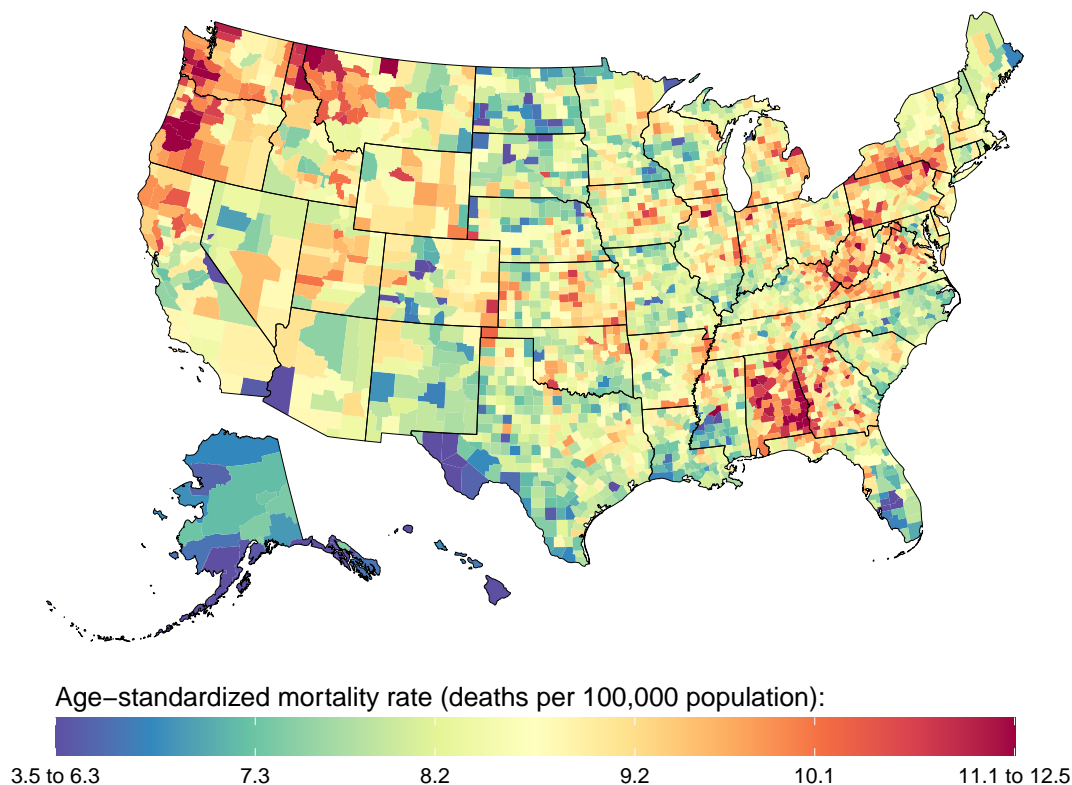

[B]

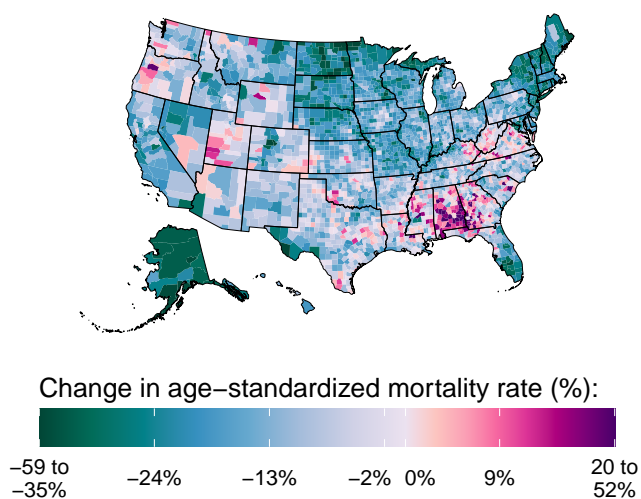

[C]

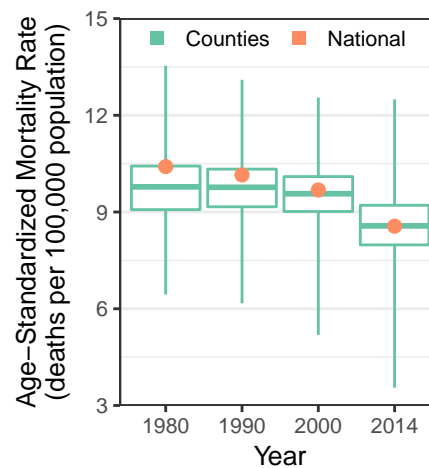

**eFigure 11: County-level mortality from ovarian cancer (females only).** [A] Age-standardized mortality rate for females in 2014; [B] Relative change in the age-standardized mortality rate for females between 1980 and 2014; [C] Age-standardized mortality rate in 1980, 1990, 2000, and 2014. In panels [A] and [B], the color scale is truncated at approximately the 1st and 99th percentile as indicated by the range given in the color scale. In panel [C], the boxes indicate the 25th, 50th, and 75th percentile across all counties while the lines indicate the full range across counties and the dots indicate the national-level rate.

[A]

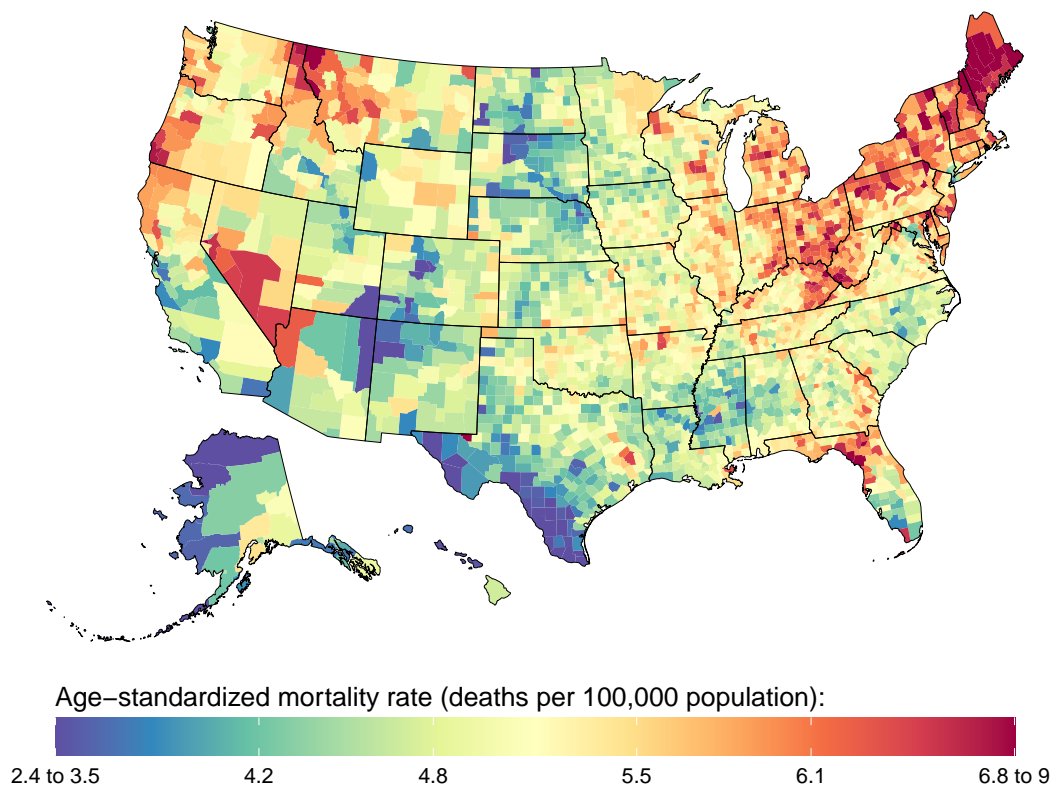

[B]

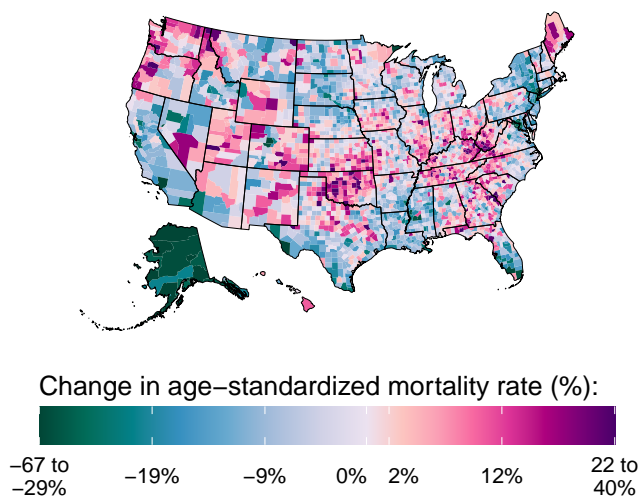

[C]

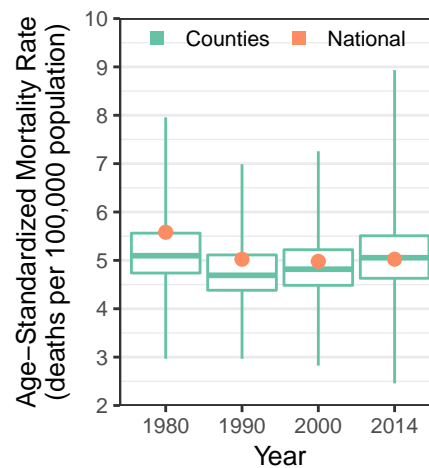

**eFigure 12: County-level mortality from bladder cancer.** [A] Age-standardized mortality rate for both sexes combined in 2014; [B] Relative change in the age-standardized mortality rate for both sexes combined between 1980 and 2014; [C] Age-standardized mortality rate in 1980, 1990, 2000, and 2014. In panels [A] and [B], the color scale is truncated at approximately the 1st and 99th percentile as indicated by the range given in the color scale. In panel [C], the boxes indicate the 25th, 50th, and 75th percentile across all counties while the lines indicate the full range across counties and the dots indicate the national-level rate.

[A]

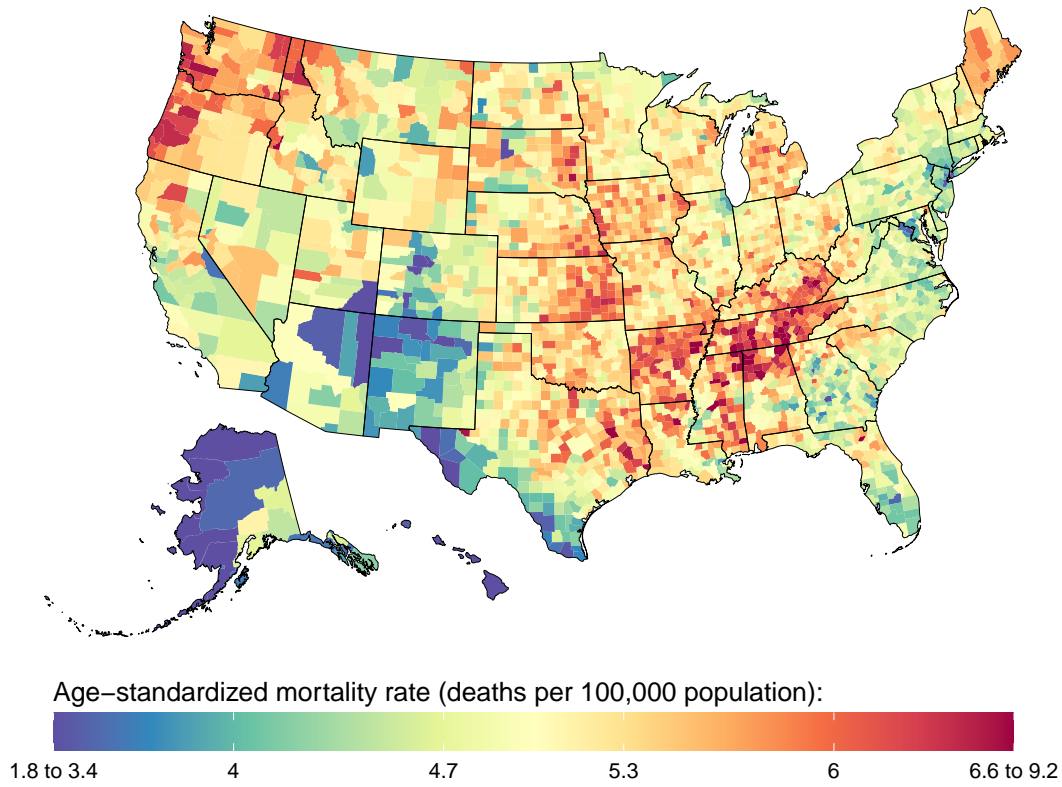

[B]

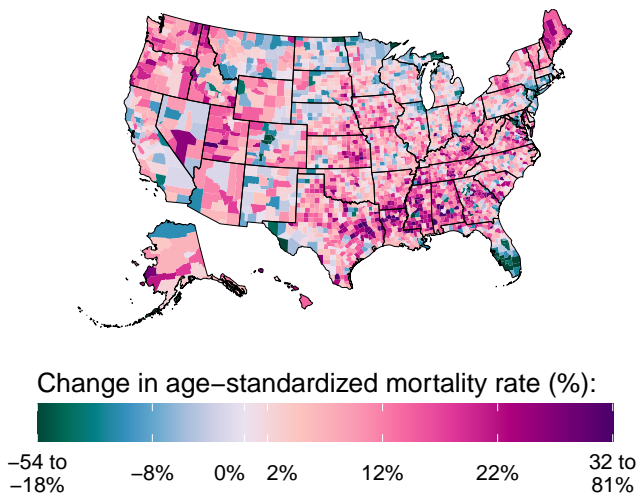

[C]

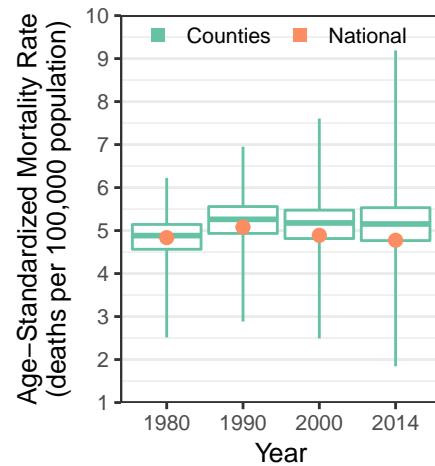

**eFigure 13: County-level mortality from brain and nervous system cancer.** [A] Age-standardized mortality rate for both sexes combined in 2014; [B] Relative change in the age-standardized mortality rate for both sexes combined between 1980 and 2014; [C] Age-standardized mortality rate in 1980, 1990, 2000, and 2014. In panels [A] and [B], the color scale is truncated at approximately the 1st and 99th percentile as indicated by the range given in the color scale. In panel [C], the boxes indicate the 25th, 50th, and 75th percentile across all counties while the lines indicate the full range across counties and the dots indicate the national-level rate.

[A]

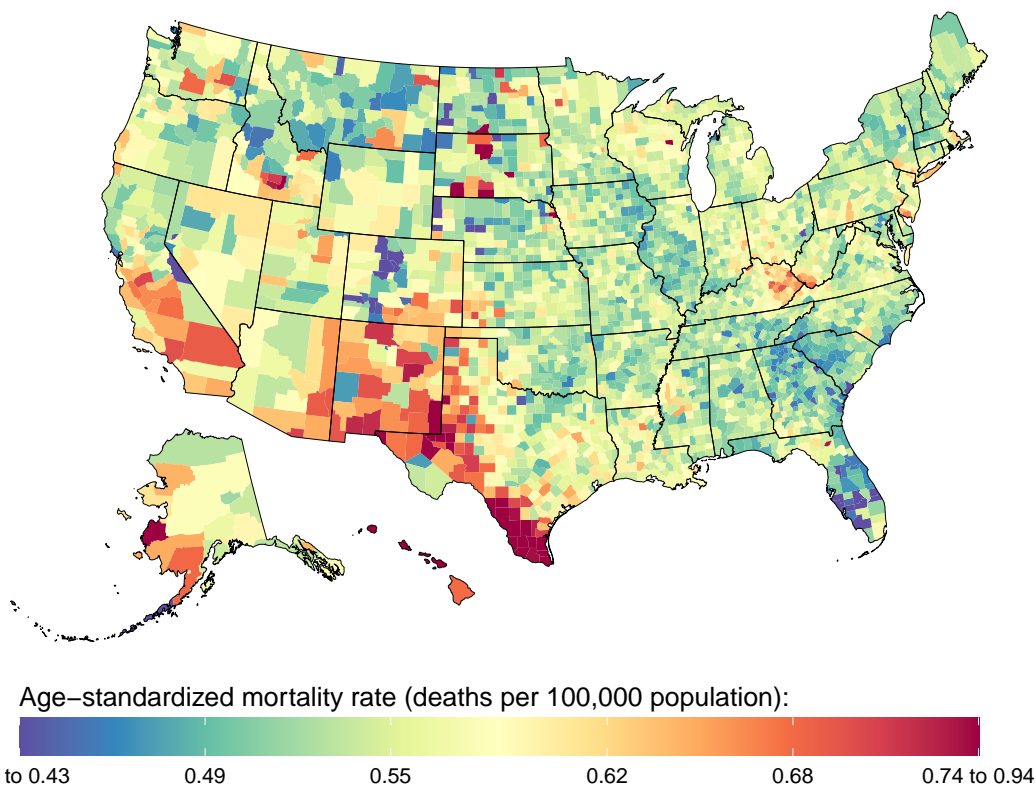

[B]

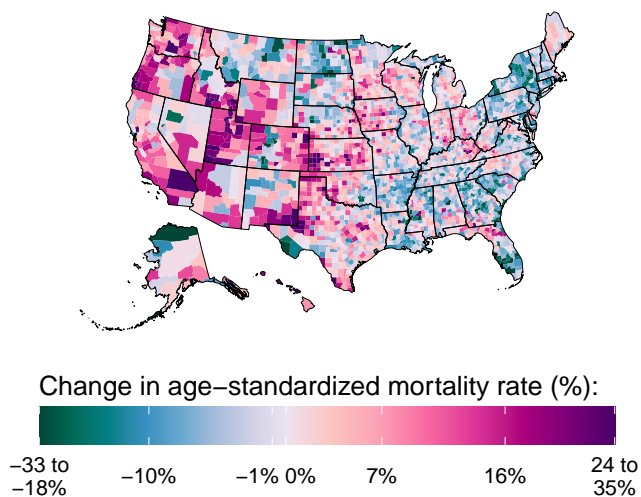

[C]

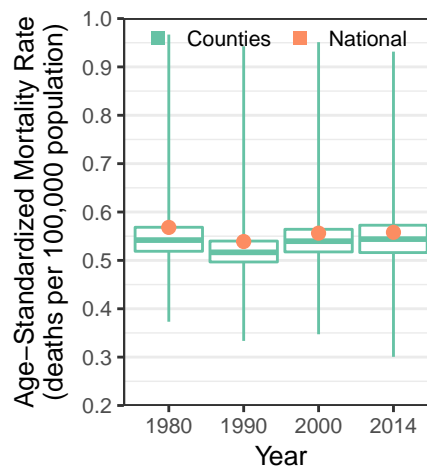

**eFigure 14: County-level mortality from thyroid cancer.** [A] Age-standardized mortality rate for both sexes combined in 2014; [B] Relative change in the age-standardized mortality rate for both sexes combined between 1980 and 2014; [C] Age-standardized mortality rate in 1980, 1990, 2000, and 2014. In panels [A] and [B], the color scale is truncated at approximately the 1st and 99th percentile as indicated by the range given in the color scale. In panel [C], the boxes indicate the 25th, 50th, and 75th percentile across all counties while the lines indicate the full range across counties and the dots indicate the national-level rate.



[A]

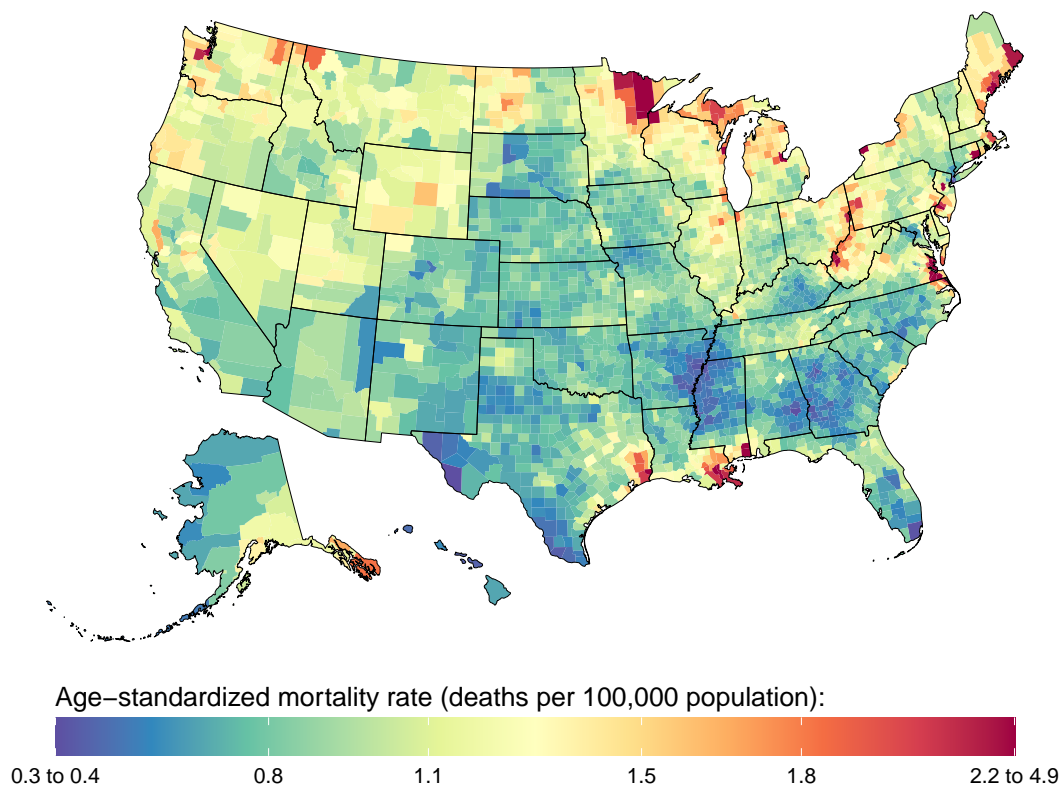

[B]

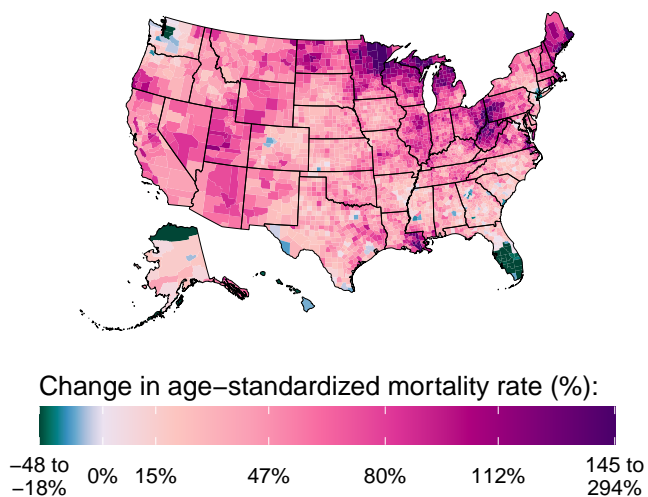

[C]

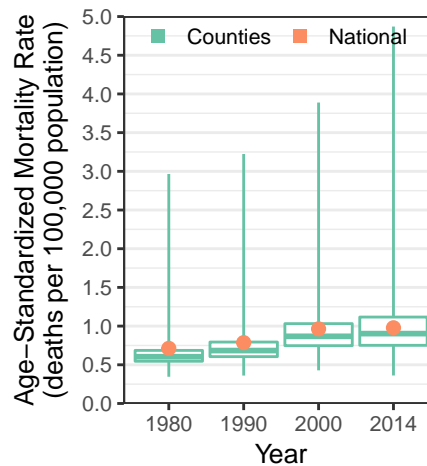

**eFigure 15: County-level mortality from mesothelioma.** [A] Age-standardized mortality rate for both sexes combined in 2014; [B] Relative change in the age-standardized mortality rate for both sexes combined between 1980 and 2014; [C] Age-standardized mortality rate in 1980, 1990, 2000, and 2014. In panels [A] and [B], the color scale is truncated at approximately the 1st and 99th percentile as indicated by the range given in the color scale. In panel [C], the boxes indicate the 25th, 50th, and 75th percentile across all counties while the lines indicate the full range across counties and the dots indicate the national-level rate.

[A]

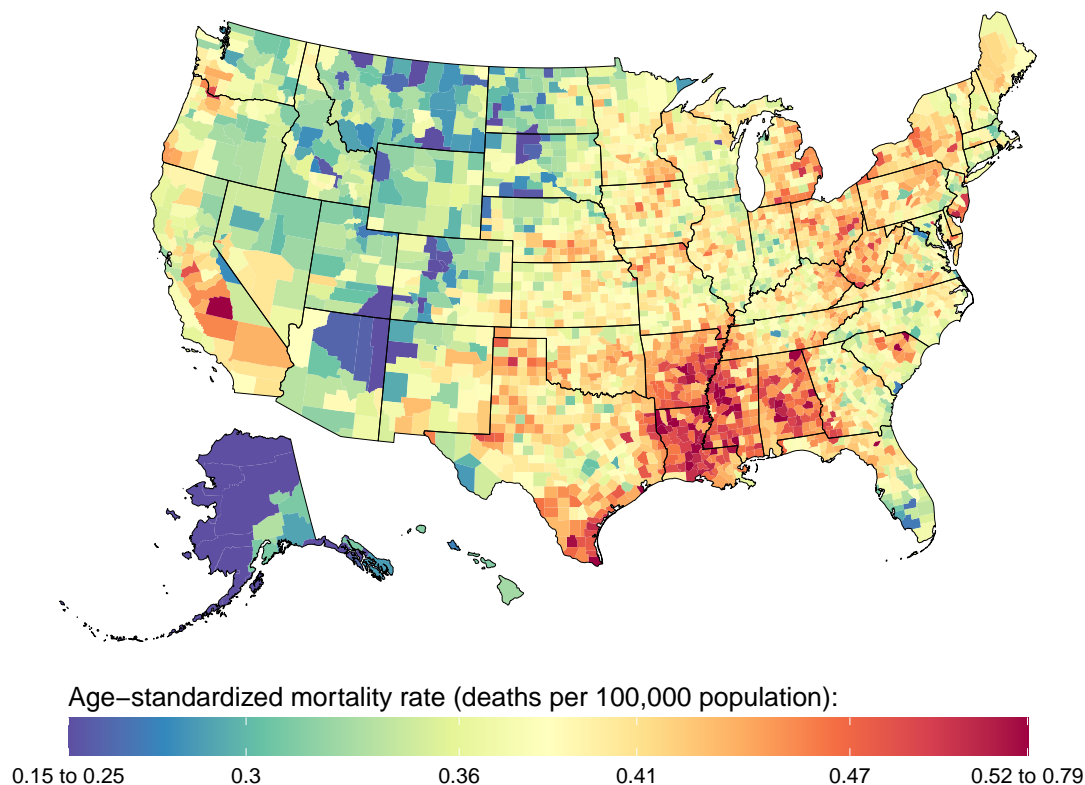

[B]

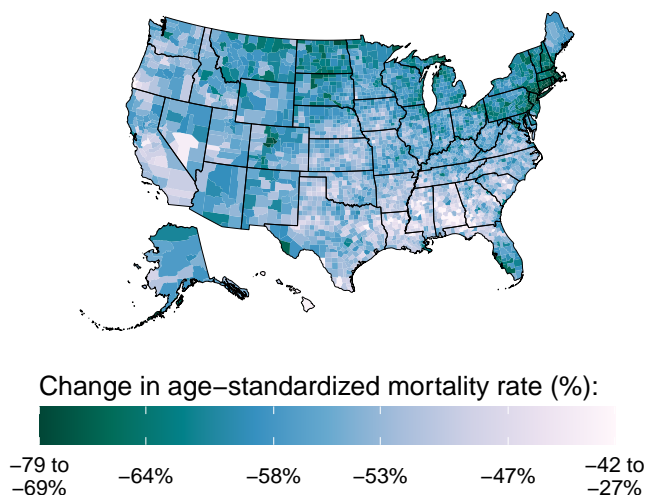

[C]

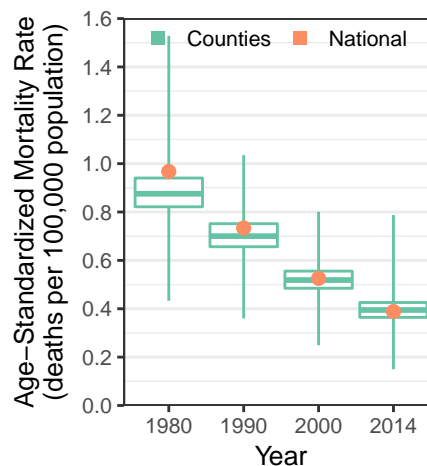

**eFigure 16: County-level mortality from Hodgkin lymphoma.** [A] Age-standardized mortality rate for both sexes combined in 2014; [B] Relative change in the age-standardized mortality rate for both sexes combined between 1980 and 2014; [C] Age-standardized mortality rate in 1980, 1990, 2000, and 2014. In panels [A] and [B], the color scale is truncated at approximately the 1st and 99th percentile as indicated by the range given in the color scale. In panel [C], the boxes indicate the 25th, 50th, and 75th percentile across all counties while the lines indicate the full range across counties and the dots indicate the national-level rate.

[A]

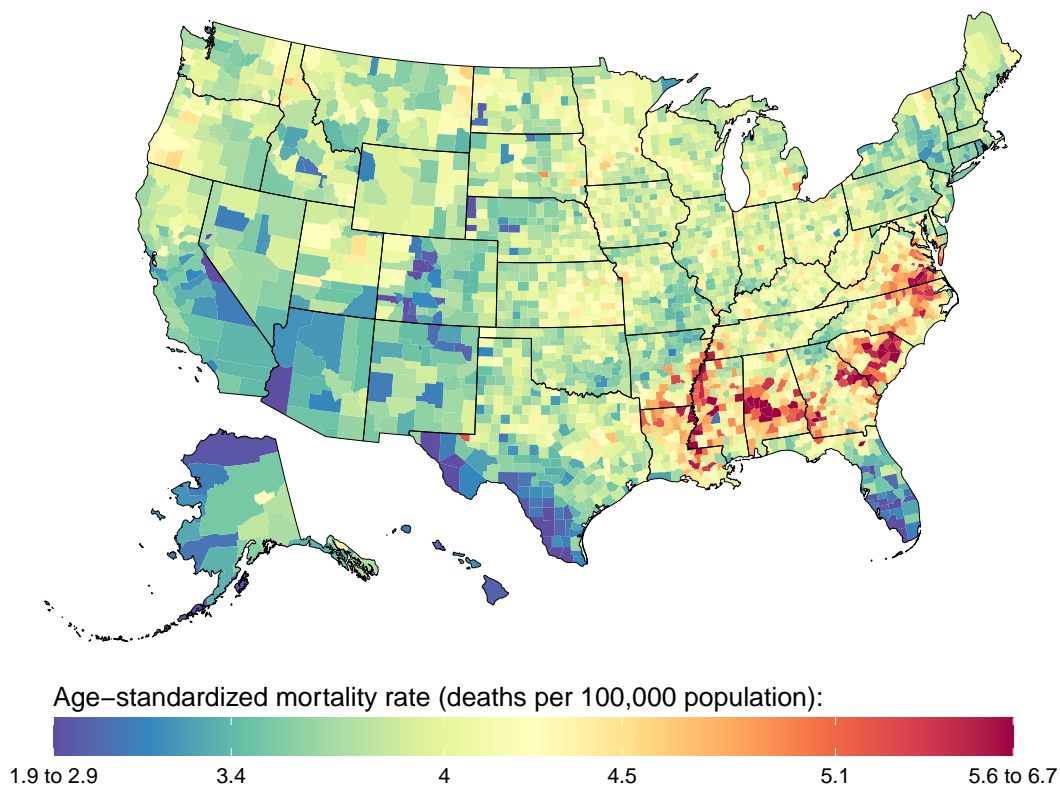

[B]

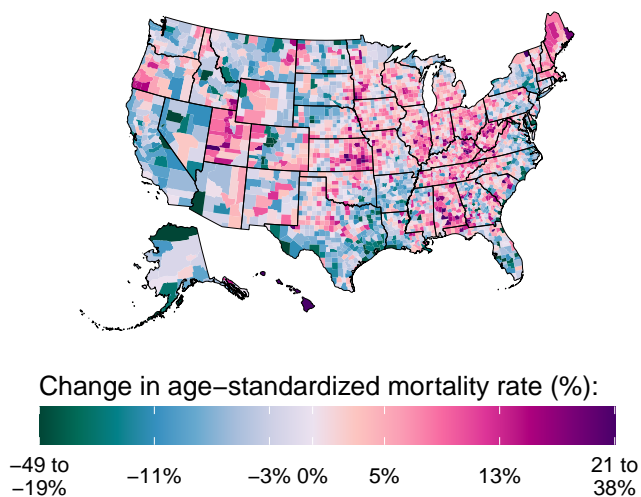

[C]

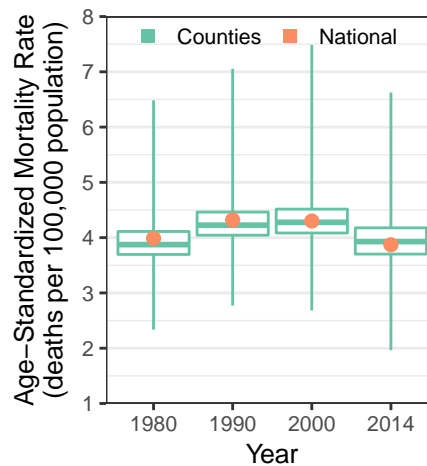

**eFigure 17: County-level mortality from multiple myeloma.** [A] Age-standardized mortality rate for both sexes combined in 2014; [B] Relative change in the age-standardized mortality rate for both sexes combined between 1980 and 2014; [C] Age-standardized mortality rate in 1980, 1990, 2000, and 2014. In panels [A] and [B], the color scale is truncated at approximately the 1st and 99th percentile as indicated by the range given in the color scale. In panel [C], the boxes indicate the 25th, 50th, and 75th percentile across all counties while the lines indicate the full range across counties and the dots indicate the national-level rate.

[A]

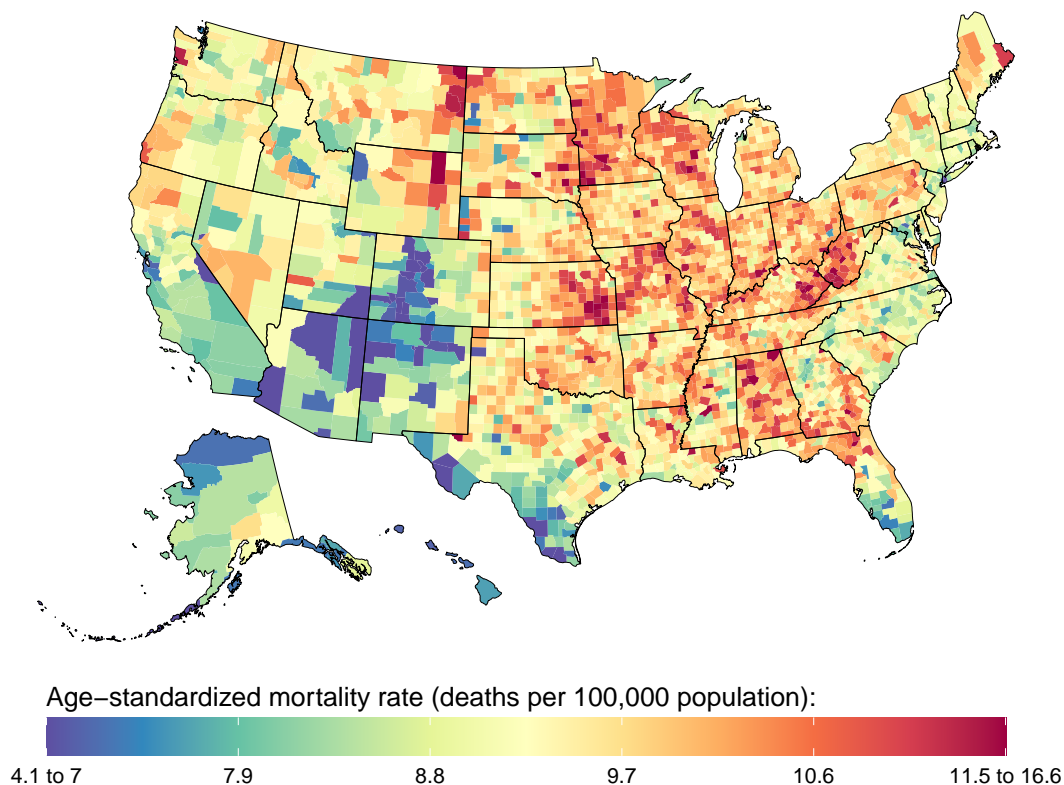

[B]

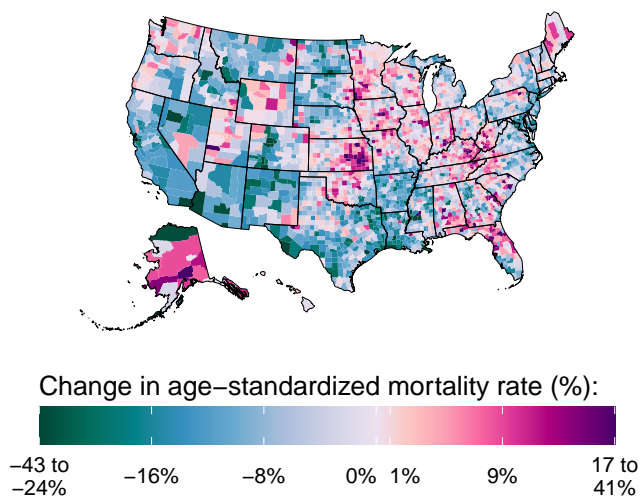

[C]

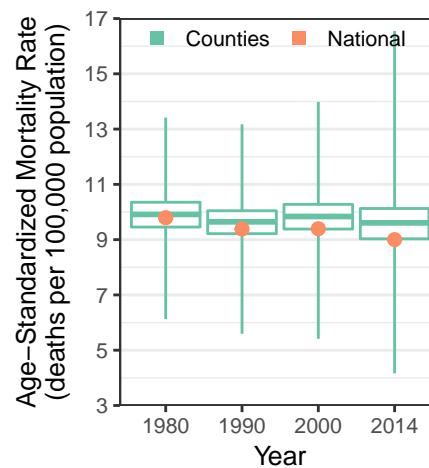

**eFigure 18: County-level mortality from leukemia.** [A] Age-standardized mortality rate for both sexes combined in 2014; [B] Relative change in the age-standardized mortality rate for both sexes combined between 1980 and 2014; [C] Age-standardized mortality rate in 1980, 1990, 2000, and 2014. In panels [A] and [B], the color scale is truncated at approximately the 1st and 99th percentile as indicated by the range given in the color scale. In panel [C], the boxes indicate the 25th, 50th, and 75th percentile across all counties while the lines indicate the full range across counties and the dots indicate the national-level rate.

[A]

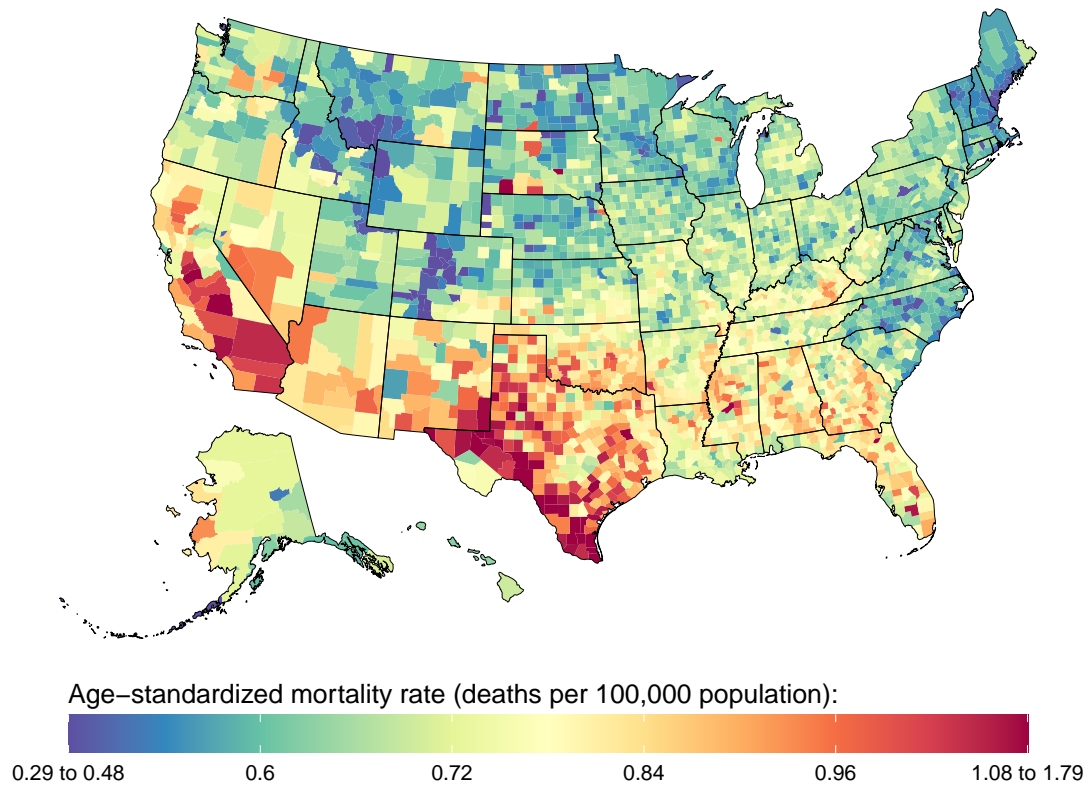

[B]

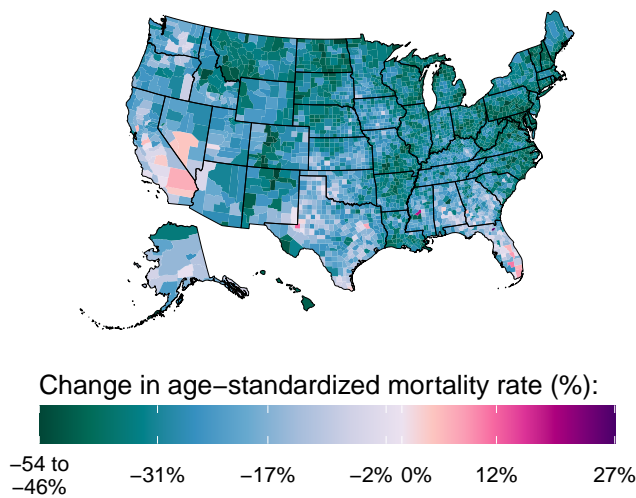

[C]

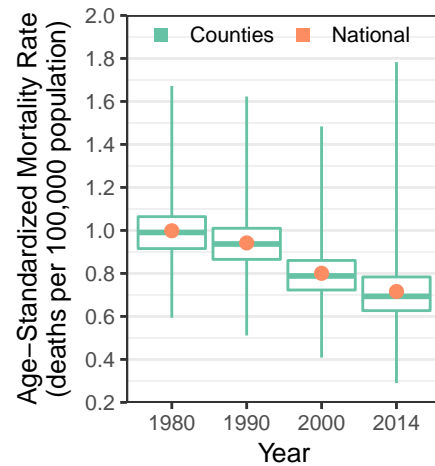

**eFigure 19: County-level mortality from acute lymphoid leukemia.** [A] Age-standardized mortality rate for both sexes combined in 2014; [B] Relative change in the age-standardized mortality rate for both sexes combined between 1980 and 2014; [C] Age-standardized mortality rate in 1980, 1990, 2000, and 2014. In panel [A], the color scale is truncated at approximately the 1st and 99th percentile as indicated by the range given in the color scale. In panel [B], the color scale is similarly truncated at the 1st percentile, but not at the 99th percentile, to avoid combining counties with decreases in the mortality rate and counties with increases in the mortality rate into a single group. In panel [C], the boxes indicate the 25th, 50th, and 75th percentile across all counties while the lines indicate the full range across counties and the dots indicate the national-level rate.

[A]

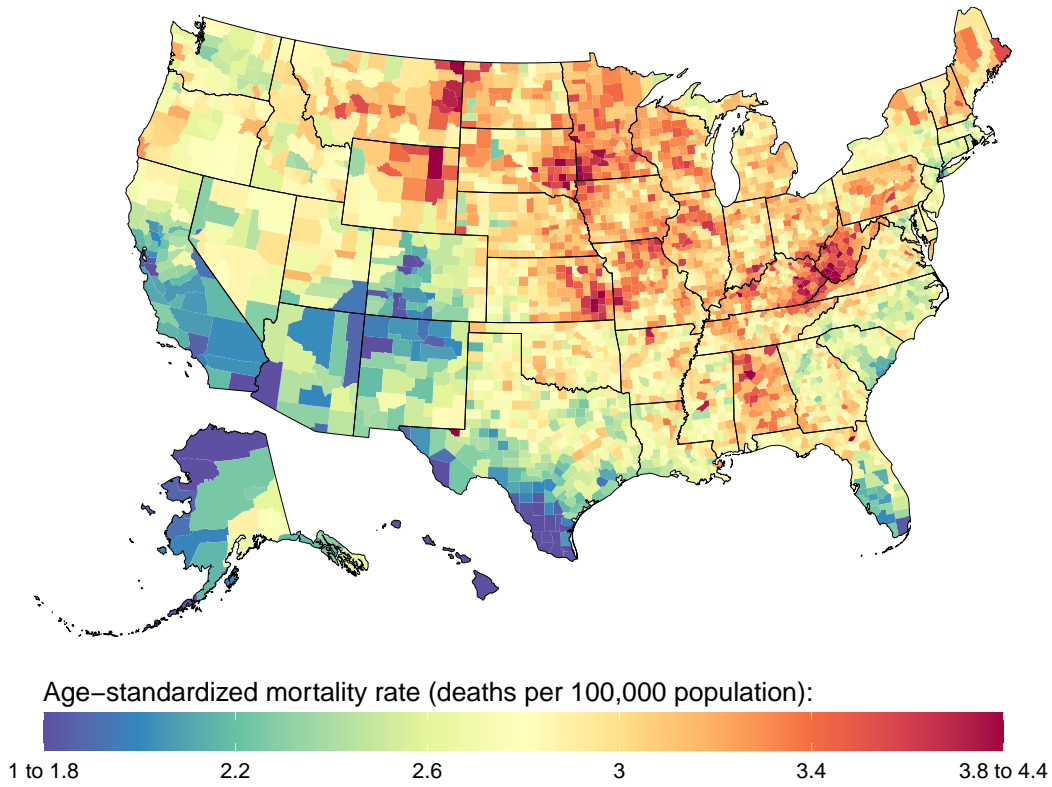

[B]

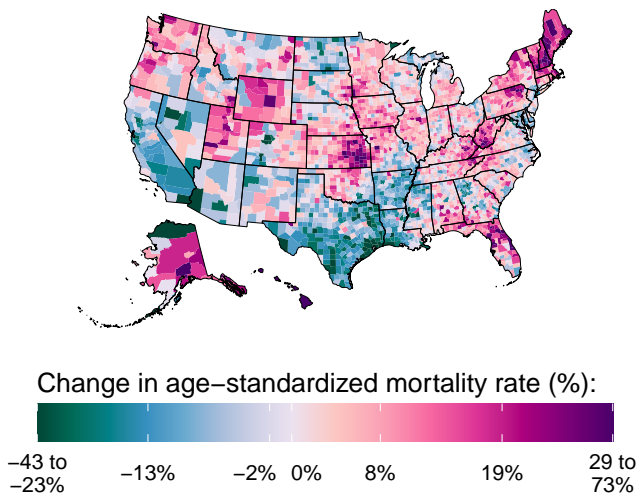

[C]

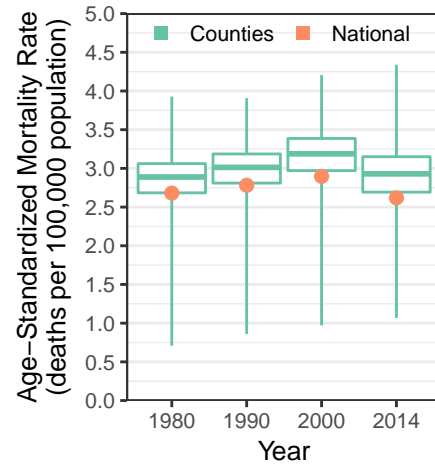

**eFigure 20: County-level mortality from chronic lymphoid leukemia.** [A] Age-standardized mortality rate for both sexes combined in 2014; [B] Relative change in the age-standardized mortality rate for both sexes combined between 1980 and 2014; [C] Age-standardized mortality rate in 1980, 1990, 2000, and 2014. In panels [A] and [B], the color scale is truncated at approximately the 1st and 99th percentile as indicated by the range given in the color scale. In panel [C], the boxes indicate the 25th, 50th, and 75th percentile across all counties while the lines indicate the full range across counties and the dots indicate the national-level rate.

[A]

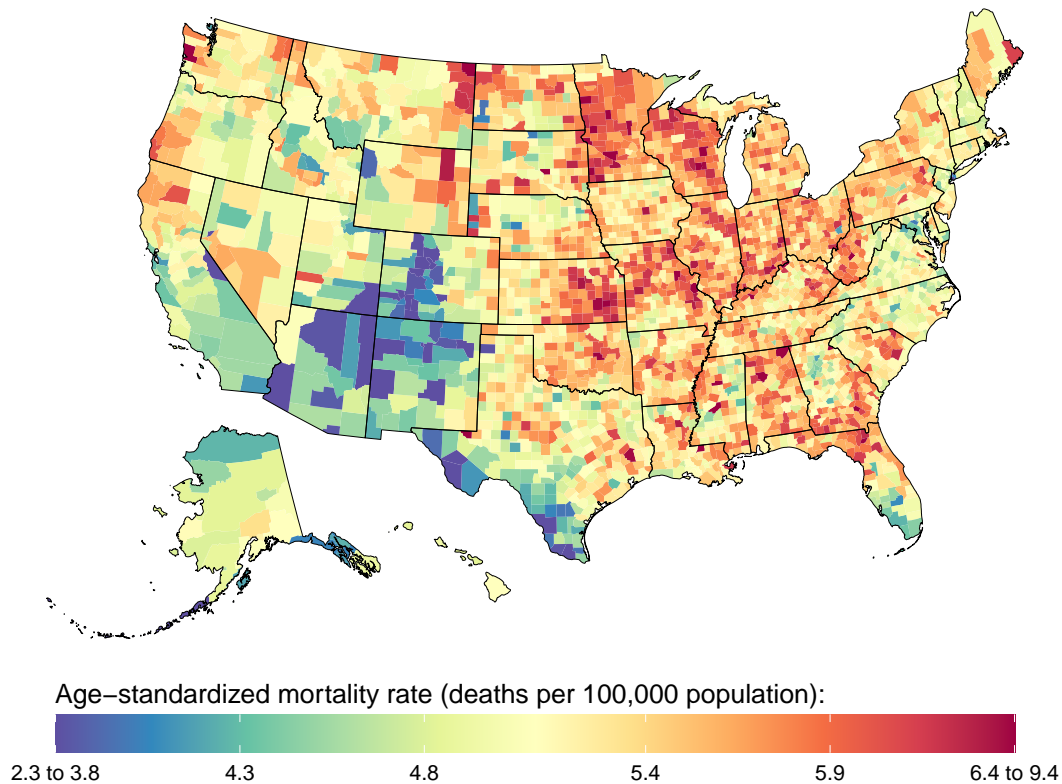

[B]

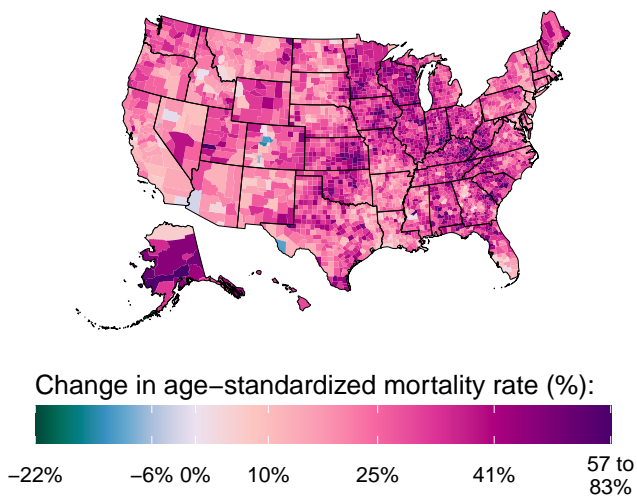

[C]

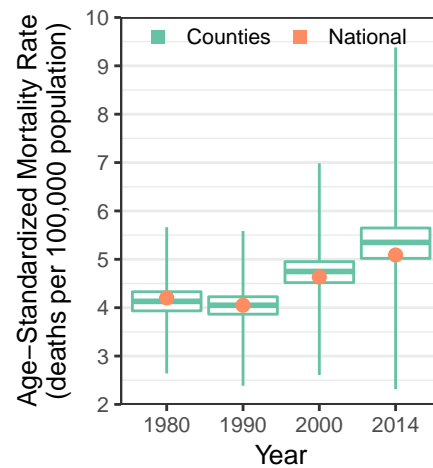

**eFigure 21: County-level mortality from acute myeloid leukemia.** [A] Age-standardized mortality rate for both sexes combined in 2014; [B] Relative change in the age-standardized mortality rate for both sexes combined between 1980 and 2014; [C] Age-standardized mortality rate in 1980, 1990, 2000, and 2014. In panel [A], the color scale is truncated at approximately the 1st and 99th percentile as indicated by the range given in the color scale. In panel [B], the color scale is similarly truncated at the 99th percentile, but not at the 1st percentile, to avoid combining counties with decreases in the mortality rate and counties with increases in the mortality rate into a single group. In panel [C], the boxes indicate the 25th, 50th, and 75th percentile across all counties while the lines indicate the full range across counties and the dots indicate the national-level rate.

[A]

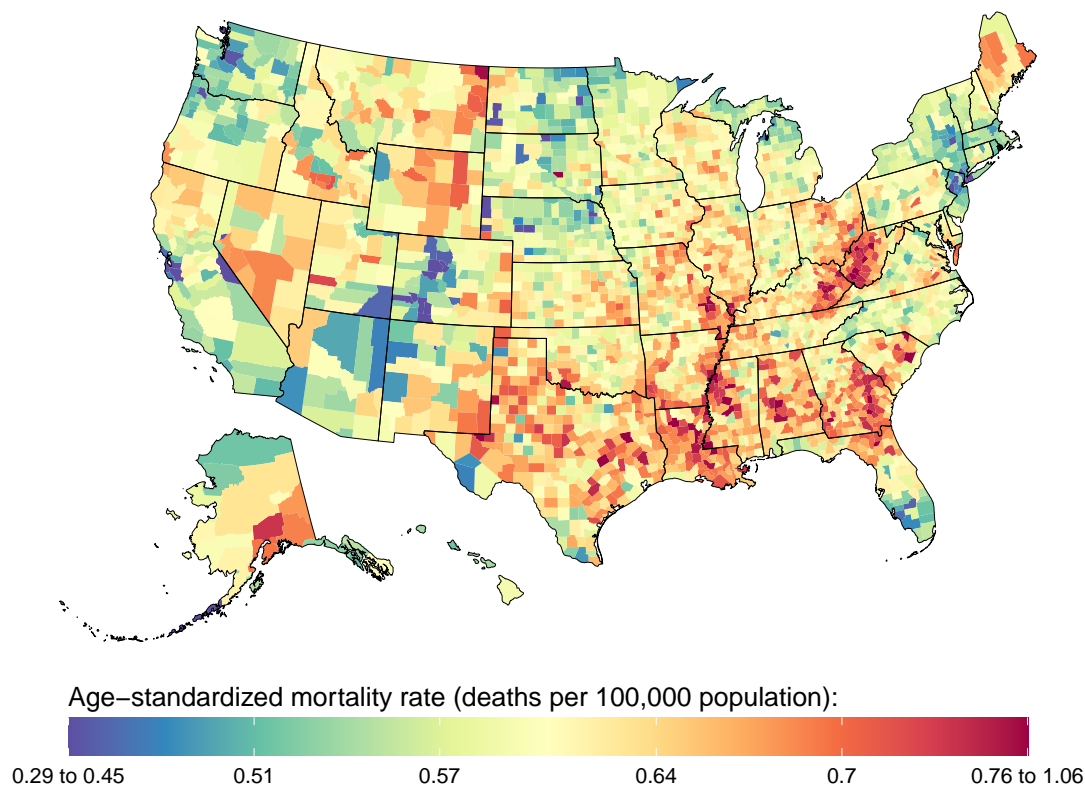

[B]

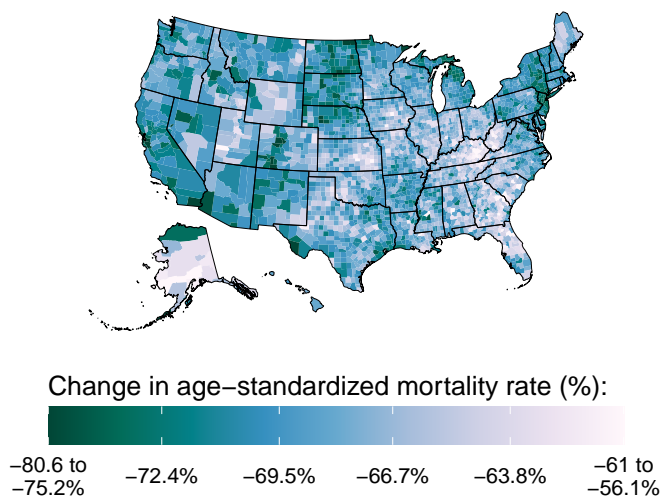

[C]

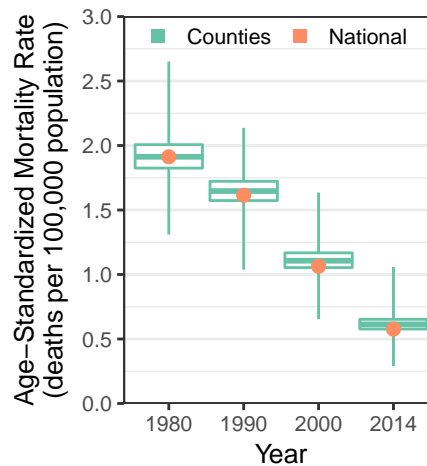

**eFigure 22: County-level mortality from chronic myeloid leukemia.** [A] Age-standardized mortality rate for both sexes combined in 2014; [B] Relative change in the age-standardized mortality rate for both sexes combined between 1980 and 2014; [C] Age-standardized mortality rate in 1980, 1990, 2000, and 2014. In panels [A] and [B], the color scale is truncated at approximately the 1st and 99th percentile as indicated by the range given in the color scale. In panel [C], the boxes indicate the 25th, 50th, and 75th percentile across all counties while the lines indicate the full range across counties and the dots indicate the national-level rate.



[A]

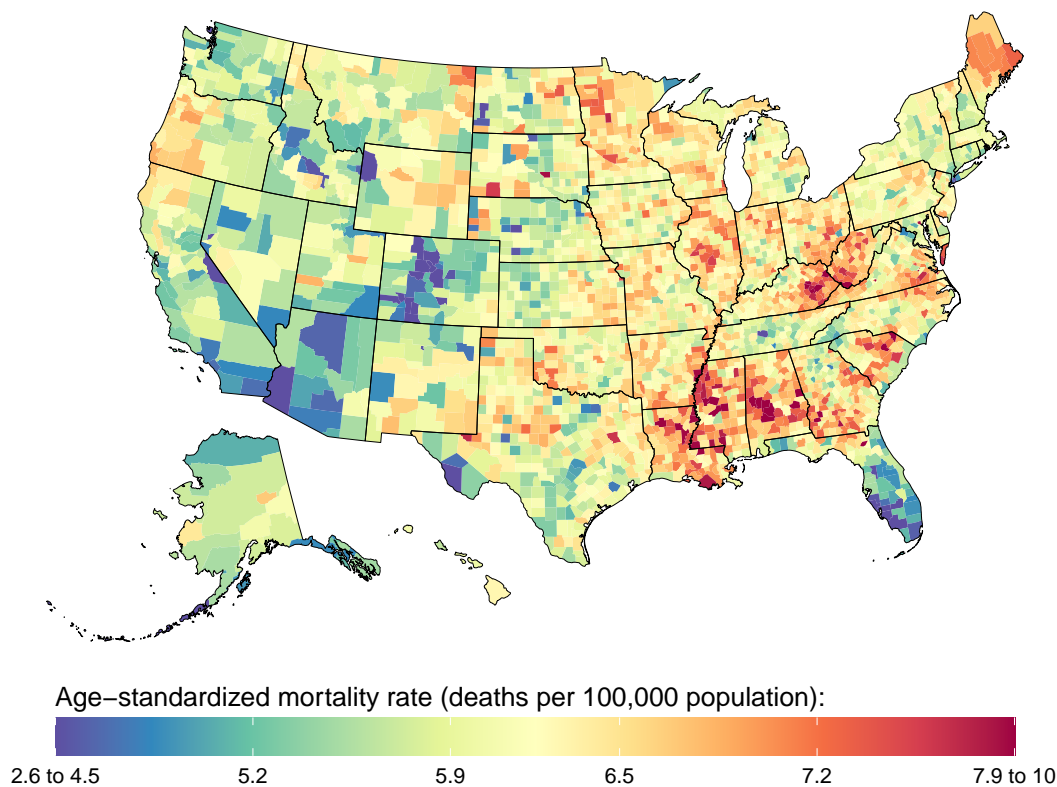

[B]

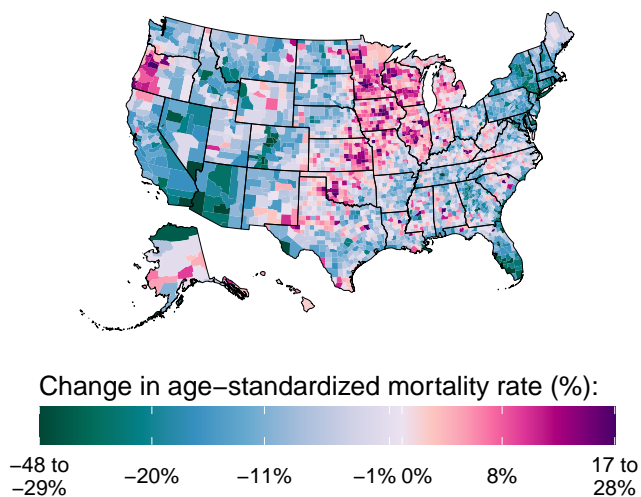

[C]

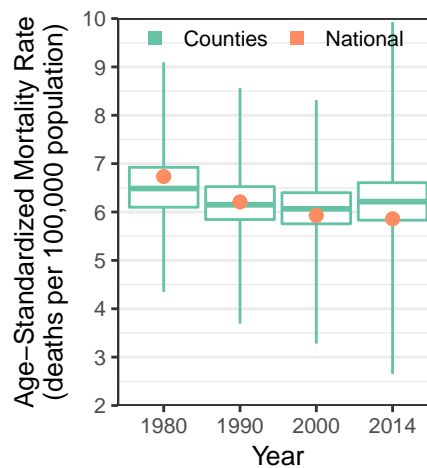

**eFigure 23: County-level mortality from other neoplasms.** [A] Age-standardized mortality rate for both sexes combined in 2014; [B] Relative change in the age-standardized mortality rate for both sexes combined between 1980 and 2014; [C] Age-standardized mortality rate in 1980, 1990, 2000, and 2014. In panels [A] and [B], the color scale is truncated at approximately the 1st and 99th percentile as indicated by the range given in the color scale. In panel [C], the boxes indicate the 25th, 50th, and 75th percentile across all counties while the lines indicate the full range across counties and the dots indicate the national-level rate.

## eTables

**eTable 1:** Data sources used for covariates.

**eTable 2:** GBD cause list and associated ICD9 and ICD10 codes.

**eTable 3:** Five-year relative survival, 1973-2013, by age group.

**eTable 4:** Counties with the lowest and highest age-standardized mortality rate in 2014, by cause of death.

**eTable 1: Data sources used for covariates.**

| Data Sources                                                                                                                                                                                     | Data Processing                                                                                                                                                                                                                                                                                                                                                   |
|--------------------------------------------------------------------------------------------------------------------------------------------------------------------------------------------------|-------------------------------------------------------------------------------------------------------------------------------------------------------------------------------------------------------------------------------------------------------------------------------------------------------------------------------------------------------------------|
| Percent of the population age 25 and older who have completed high school                                                                                                                        |                                                                                                                                                                                                                                                                                                                                                                   |
| 1980 census [1]; 1990 census [2]; 2000 census [3]; 2009-2014 ACS [4-9]                                                                                                                           | Linear interpolation was used fill in intermediate years between data sources. The rate of change calculated between 2007 and 2012 was applied to fill in estimates for 2013 and 2014.                                                                                                                                                                            |
| Percent of the population who are Hispanic                                                                                                                                                       |                                                                                                                                                                                                                                                                                                                                                                   |
| 1980 census [10]; 1990-2014 NCHS Bridged Race Files [11-13]                                                                                                                                      | Linear interpolation was used to fill in intermediate years between data sources.                                                                                                                                                                                                                                                                                 |
| Percent of the population who are Black and some other race                                                                                                                                      |                                                                                                                                                                                                                                                                                                                                                                   |
| 1980-1989 Census Bureau Intercensal County Estimates by Age, Sex, and Race [14]; 1990-2014 NCHS Bridged Race Files [11-13]                                                                       | Linear interpolation was used to fill in intermediate years between data sources.                                                                                                                                                                                                                                                                                 |
| Percent of land area in a Native American reservation                                                                                                                                            |                                                                                                                                                                                                                                                                                                                                                                   |
| 2013 Cartographic Boundary File, State-County for United States [15]; AIANNH Areas National Shapefile [16]                                                                                       | Geographic boundaries of AIANNH Areas were intersected with county boundaries using ArcGIS. The area of the intersection and the area of the county were calculated using an Albers Equal Area Conic projection. The proportion of the land area that is in a reservation was generated by dividing the area of the reservation by the total area in each county. |
| Household Median Income                                                                                                                                                                          |                                                                                                                                                                                                                                                                                                                                                                   |
| 1980 census [17]; 1989, 1993, 1995-2014 Small Area Income and Poverty Estimates [18]; 1980-2014 Bureau of Labor Statistics, Consumer Price Index [19]                                            | Data were adjusted for inflation using the consumer price index, and linear interpolation was used to generate values between observed data points. Income was then log-transformed.                                                                                                                                                                              |
| Population Density                                                                                                                                                                               |                                                                                                                                                                                                                                                                                                                                                                   |
| 1980-1989 Census Bureau Intercensal County Estimates by Age, Sex, and Race [14]; 1990-2014 NCHS Bridged Race Files [11-13]; 2013 Cartographic Boundary File, State-County for United States [15] | The area of each county was calculated using an Albers Equal Area Conic projection. The total population of each county was divided by the total area of the county, and was then log-transformed.                                                                                                                                                                |

- [1] Missouri Census Data Center. 1980 Census Summary Tape File 3, Table NT48A. MCDC Data Archive (Uexplore/Dexter). <http://mcdc2.missouri.edu/applications/uexplore.shtml>. Accessed April 22, 2013.
- [2] Minnesota Population Center. 1990 Census Summary Tape File 3, Table P057. National Historical Geographic Information System: Version 2.0. Minneapolis, MN: University of Minnesota 2011. <http://www.nhgis.org>. Accessed July 18, 2013.
- [3] U.S. Census Bureau. 2000 Census Summary Tape File 3, Table DP2; using American FactFinder; <http://factfinder2.census.gov>. Accessed April 18, 2013.
- [4] U.S. Census Bureau. American Community Survey, 2009 American Community Survey 5-Year Estimates, Table S1501; using American FactFinder; <http://factfinder2.census.gov>. Accessed April 17, 2013.
- [5] U.S. Census Bureau. American Community Survey, 2010 American Community Survey 5-Year Estimates, Table S1501; using American FactFinder; <http://factfinder2.census.gov>. Accessed April 17, 2013.
- [6] U.S. Census Bureau. American Community Survey, 2011 American Community Survey 5-Year Estimates, Table S1501; using American FactFinder; <http://factfinder2.census.gov>. Accessed April 17, 2013.
- [7] U.S. Census Bureau. American Community Survey, 2012 American Community Survey 5-Year Estimates, Table S1501; using American FactFinder; <http://factfinder2.census.gov>. Accessed December 18, 2013.
- [8] U.S. Census Bureau. American Community Survey, 2013 American Community Survey 5-Year Estimates, Table S1501; using American FactFinder; <http://factfinder2.census.gov>. Accessed December 23, 2014.
- [9] U.S. Census Bureau. American Community Survey, 2014 American Community Survey 5-Year Estimates, Table S1501; using American FactFinder; <http://factfinder2.census.gov>. Accessed December 8, 2015.
- [10] Minnesota Population Center. 1980 Census Summary Tape File 1, Table NT8. National Historical Geographic Information System: Version 2.0. Minneapolis, MN: University of Minnesota 2011. <http://www.nhgis.org>. Accessed January 13, 2016.
- [11] National Center for Health Statistics, Centers for Disease Control and Prevention, US Census Bureau. United States Bridged-Race Intercensal Population Estimates 1990-1999. Hyattsville, United States: National Center for Health Statistics, Centers for Disease Control and Prevention, 2004. Accessed November 21, 2011.
- [12] National Center for Health Statistics, Centers for Disease Control and Prevention, US Census Bureau. United States Bridged-Race Intercensal Population Estimates 2000-2009. Hyattsville, United States: National Center for Health Statistics, Centers for Disease Control and Prevention, 2012. Accessed October 30, 2012.
- [13] National Center for Health Statistics, Centers for Disease Control and Prevention, United States Census Bureau. United States Vintage 2014 Bridged-Race Postcensal Population Estimates 2010-2014. Hyattsville, United States: National Center for Health Statistics, Centers for Disease Control and Prevention, 2015. Accessed December 18, 2015.
- [14] U.S. Census Bureau. Intercensal County Estimates by Age, Sex, Race: 1980-1989. <http://www.census.gov/popest/data/counties/asrh/1980s/PE-02.html>. Accessed January 8, 2015.
- [15] U.S. Census Bureau. TIGER/Line Shapefile, 2013 Cartographic Boundary File, State-County for United States, 1:20,000,000. <https://catalog.data.gov/dataset/2013-cartographic-boundary-file-state-county-for-united-states-1-20000000>. Accessed February 2, 2015.
- [16] U.S. Census Bureau. TIGER/Line Shapefile, 2012, Series Information File for the Nation, Current Amer-

ican Indian/Alaska Native/Native Hawaiian Areas (AIANNH) National Shapefile. <http://catalog.data.gov/dataset/tiger-line-shapefile-2012-series-information-file-for-the-nation-current-american-indian-alaska>. Accessed February 10, 2015.

[17] Minnesota Population Center. Summary Tape File 3, Table NT69. National Historical Geographic Information System: Version 2.0. Minneapolis, MN: University of Minnesota 2011. <http://www.nhgis.org>. Accessed November 12, 2015.

[18] U.S. Census Bureau. Small Area Income and Poverty Estimates. <https://www.census.gov/did/www/saipe/data/statecounty/data/index.html>. Accessed December 28, 2015.

[19] U.S. Bureau of Labor Statistics. Consumer Price Index: All Urban Consumers History, All Items 1913-2015. <http://www.bls.gov/data/>. Accessed March 24, 2015.

eTable 2: GBD cause list and associated ICD9 and ICD10 codes.

| Cause                                                             | Level | ICD9                                                                                                                                                                                                                                                                                                                                                                                                                                                                                                                                                                                                                                                                                                                                                                                                                          | ICD10                                                                                                                                                                                                                                                                                                                                                                                                                                                                                                                                                                                                                                                                                                                                                                                                                                                                                                                                                                                                                                                                                                                                                                          |
|-------------------------------------------------------------------|-------|-------------------------------------------------------------------------------------------------------------------------------------------------------------------------------------------------------------------------------------------------------------------------------------------------------------------------------------------------------------------------------------------------------------------------------------------------------------------------------------------------------------------------------------------------------------------------------------------------------------------------------------------------------------------------------------------------------------------------------------------------------------------------------------------------------------------------------|--------------------------------------------------------------------------------------------------------------------------------------------------------------------------------------------------------------------------------------------------------------------------------------------------------------------------------------------------------------------------------------------------------------------------------------------------------------------------------------------------------------------------------------------------------------------------------------------------------------------------------------------------------------------------------------------------------------------------------------------------------------------------------------------------------------------------------------------------------------------------------------------------------------------------------------------------------------------------------------------------------------------------------------------------------------------------------------------------------------------------------------------------------------------------------|
| Communicable, maternal, neonatal, and nutritional diseases        | 1     | 001-001.9, 002.0-030.9, 032-034.9, 036-036.40, 036.5, 036.8-037.9, 039-039.4, 039.8-040, 040.1-041.09, 042-066.9, 070-070.21, 070.3-070.31, 070.4-070.43, 070.49-070.53, 070.59-074.1, 074.20, 074.3-075.9, 078.4-078.7, 079-079.7, 080-083.9, 084.0-084.5, 084.7-084.9, 085.0, 086-088.9, 090-101.6, 104-104.9, 120-124.9, 125.4-125.9, 127-127.1, 128-129.0, 136-136.29, 137-139.0, 244.2, 260-263.9, 265-269.9, 280.1-280.8, 281.0-281.9, 320.0-320.89, 321-323.9, 381-383.9, 390-390.9, 392, 392.9, 461-461.9, 464.0, 464.01, 464.11-464.2, 464.21, 464.31-464.4, 464.8-464.9, 466-469, 470.0, 475-475.9, 476.9, 480-482.89, 483.0-483.9, 484.0-484.7, 487-489, 613-614.9, 630-636.92, 638-638.92, 640-679.14, 716.0-716.09, 730.4-730.6, 760-760.64, 760.8-768, 768.2-770, 770.1-775, 775.4-779.34, 779.6-779.89, 787.91 | A00-A00.9, A01.0-A14, A15-A28.9, A30-A30.9, A32-A39.4, A39.8-A39.9, A48.1-A48.2, A48.4-A48.52, A49.1, A50-A58, A60-A60.9, A63-A63.8, A65-A65.0, A68-A70, A74, A74.8-A75.9, A77-A96.9, A98-A98.8, B00-B06.9, B10-B10.89, B15-B17.9, B19-B27.99, B29.4, B33-B33.1, B33.3-B33.8, B47-B48.8, B50-B53.8, B55.0, B56-B57.5, B60-B60.8, B63, B65-B67.99, B69-B72.0, B74.3-B75, B77-B77.9, B83-B83.8, B90-B92, B94.1-B94.2, B95-B95.5, D50.1-D50.8, D51-D52.0, D52.8-D53.9, D64.3, D86.81, E00-E02, E40-E46.9, E51-E61.9, E63-E64.0, E64.2-E64.9, F07.1, G00.0-G00.8, G03-G03.8, G04-G05.8, G14-G14.6, H70-H70.93, I00, I02, I02.9, I98.0-I98.1, J01-J01.91, J02.0, J03.0-J03.01, J04.0, J05-J05.0, J05.11, J09-J15.8, J16-J16.9, J20-J21.9, J36-J36.0, K67.0-K67.8, K74.7-K74.8, K93.0, M03.1, M12.1-M12.19, M49.0-M49.1, M73.0-M73.1, M89.6-M89.69, N70-N71.9, N73-N74.8, N96, N98-N98.9, O00-O07.9, O09-O16.9, O20-O26.93, O28-O36.93, O40-O48.1, O60-O77.9, O80-O92.79, O96-P04.2, P04.5-P05.9, P07-P15.9, P19-P22.9, P23.0-P23.4, P24-P29.9, P35-P37.2, P37.5-P39.9, P50-P61.9, P70, P70.3-P72.9, P74-P78.9, P80-P81.9, P83-P84, P90-P94.9, P96, P96.3-P96.4, P96.8-P96.89, R19.7 |
| HIV/AIDS and tuberculosis                                         | 2     | 010-019.9, 042-044.9, 137-137.9, 138.0-138.9, 730.4-730.6                                                                                                                                                                                                                                                                                                                                                                                                                                                                                                                                                                                                                                                                                                                                                                     | A10-A14, A15-A19.9, B20-B24.9, B90-B90.9, K67.3, K93.0, M49.0, P37.0                                                                                                                                                                                                                                                                                                                                                                                                                                                                                                                                                                                                                                                                                                                                                                                                                                                                                                                                                                                                                                                                                                           |
| Tuberculosis                                                      | 3-4   | 010-019.9, 137-137.9, 138.0-138.9, 730.4-730.6                                                                                                                                                                                                                                                                                                                                                                                                                                                                                                                                                                                                                                                                                                                                                                                | A10-A14, A15-A19.9, B90-B90.9, K67.3, K93.0, M49.0, P37.0                                                                                                                                                                                                                                                                                                                                                                                                                                                                                                                                                                                                                                                                                                                                                                                                                                                                                                                                                                                                                                                                                                                      |
| HIV/AIDS                                                          | 3     | 042-044.9                                                                                                                                                                                                                                                                                                                                                                                                                                                                                                                                                                                                                                                                                                                                                                                                                     | B20-B24.9                                                                                                                                                                                                                                                                                                                                                                                                                                                                                                                                                                                                                                                                                                                                                                                                                                                                                                                                                                                                                                                                                                                                                                      |
| HIV/AIDS - Tuberculosis                                           | 4     |                                                                                                                                                                                                                                                                                                                                                                                                                                                                                                                                                                                                                                                                                                                                                                                                                               | B20.0                                                                                                                                                                                                                                                                                                                                                                                                                                                                                                                                                                                                                                                                                                                                                                                                                                                                                                                                                                                                                                                                                                                                                                          |
| HIV/AIDS resulting in other diseases                              | 4     | 042.0-042.9, 043.0-043.9, 044.1-044.9                                                                                                                                                                                                                                                                                                                                                                                                                                                                                                                                                                                                                                                                                                                                                                                         | B20.1-B23.9, B24.0                                                                                                                                                                                                                                                                                                                                                                                                                                                                                                                                                                                                                                                                                                                                                                                                                                                                                                                                                                                                                                                                                                                                                             |
| Diarrhea, lower respiratory, and other common infectious diseases | 2     | 001-001.9, 002.0-009.9, 032-033.9, 036-036.40, 036.5, 036.8-037.9, 047-049.9, 052-053.9, 055-055.9, 062-064.9, 073.0-073.6, 139.0, 320.0-320.89, 321-323, 323.1, 323.4-323.9, 381-383.9, 461-461.9, 464.0, 464.01, 464.11-464.2, 464.21, 464.31-464.4, 464.8-464.9, 466-469, 470.0, 475-475.9, 476.9, 480-482.89, 483.0-483.9, 484.0-484.4, 484.6-484.7, 487-489, 771.3, 787.91                                                                                                                                                                                                                                                                                                                                                                                                                                               | A00-A00.9, A01.0-A09.9, A33-A37.91, A39-A39.4, A39.8-A39.9, A48.1, A70, A83-A87.9, B01-B02.9, B05-B05.9, B94.1, D86.81, F07.1, G00.0-G00.8, G03-G03.8, G04-G05.8, H70-H70.93, J01-J01.91, J04.0, J05-J05.0, J05.11, J09-J15.8, J16-J16.9, J20-J21.9, J36-J36.0, P23.0-P23.4, P35.8, R19.7                                                                                                                                                                                                                                                                                                                                                                                                                                                                                                                                                                                                                                                                                                                                                                                                                                                                                      |
| Diarrheal diseases                                                | 3-4   | 001-001.9, 003-006.9, 007.4-007.8, 008.01-008.02, 008.04, 008.2-009.9, 787.91                                                                                                                                                                                                                                                                                                                                                                                                                                                                                                                                                                                                                                                                                                                                                 | A00-A00.9, A02-A04.1, A04.3, A04.5-A07, A07.2-A07.4, A08-A09.9, R19.7                                                                                                                                                                                                                                                                                                                                                                                                                                                                                                                                                                                                                                                                                                                                                                                                                                                                                                                                                                                                                                                                                                          |
| Intestinal infectious diseases                                    | 3     | 002.0-002.9, 007-007.3, 007.9-008.00, 008.03, 008.09-008.1                                                                                                                                                                                                                                                                                                                                                                                                                                                                                                                                                                                                                                                                                                                                                                    | A01.0-A01.4, A04.2, A04.4, A07.0-A07.1, A07.8-A07.9                                                                                                                                                                                                                                                                                                                                                                                                                                                                                                                                                                                                                                                                                                                                                                                                                                                                                                                                                                                                                                                                                                                            |
| Typhoid fever                                                     | 4     | 2                                                                                                                                                                                                                                                                                                                                                                                                                                                                                                                                                                                                                                                                                                                                                                                                                             | A01.0-A01.09                                                                                                                                                                                                                                                                                                                                                                                                                                                                                                                                                                                                                                                                                                                                                                                                                                                                                                                                                                                                                                                                                                                                                                   |
| Paratyphoid fever                                                 | 4     | 002.1-002.9                                                                                                                                                                                                                                                                                                                                                                                                                                                                                                                                                                                                                                                                                                                                                                                                                   | A01.1-A01.4                                                                                                                                                                                                                                                                                                                                                                                                                                                                                                                                                                                                                                                                                                                                                                                                                                                                                                                                                                                                                                                                                                                                                                    |
| Other intestinal infectious diseases                              | 4     | 007-007.3, 007.9-008.00, 008.03, 008.09-008.1                                                                                                                                                                                                                                                                                                                                                                                                                                                                                                                                                                                                                                                                                                                                                                                 | A04.2, A04.4, A07.0-A07.1, A07.8-A07.9                                                                                                                                                                                                                                                                                                                                                                                                                                                                                                                                                                                                                                                                                                                                                                                                                                                                                                                                                                                                                                                                                                                                         |
| Lower respiratory infections                                      | 3-4   | 073.0-073.6, 466-469, 470.0, 480-482.89, 483.0-483.9, 484.1-484.2, 484.6-484.7, 487-489                                                                                                                                                                                                                                                                                                                                                                                                                                                                                                                                                                                                                                                                                                                                       | A48.1, A70, J09-J15.8, J16-J16.9, J20-J21.9, P23.0-P23.4                                                                                                                                                                                                                                                                                                                                                                                                                                                                                                                                                                                                                                                                                                                                                                                                                                                                                                                                                                                                                                                                                                                       |
| Upper respiratory infections                                      | 3-4   | 461-461.9, 464.0, 464.01, 464.11-464.2, 464.21, 464.31-464.4, 464.8-464.9, 475-475.9, 476.9                                                                                                                                                                                                                                                                                                                                                                                                                                                                                                                                                                                                                                                                                                                                   | J01-J01.91, J04.0, J05-J05.0, J05.11, J36-J36.0                                                                                                                                                                                                                                                                                                                                                                                                                                                                                                                                                                                                                                                                                                                                                                                                                                                                                                                                                                                                                                                                                                                                |
| Otitis media                                                      | 3-4   | 381-383.9                                                                                                                                                                                                                                                                                                                                                                                                                                                                                                                                                                                                                                                                                                                                                                                                                     | H70-H70.93                                                                                                                                                                                                                                                                                                                                                                                                                                                                                                                                                                                                                                                                                                                                                                                                                                                                                                                                                                                                                                                                                                                                                                     |
| Meningitis                                                        | 3     | 036-036.40, 036.5, 036.8-036.9, 047-049.9, 320.0-320.89, 321-322.9                                                                                                                                                                                                                                                                                                                                                                                                                                                                                                                                                                                                                                                                                                                                                            | A39-A39.4, A39.8-A39.9, A87-A87.9, D86.81, G00.0-G00.8, G03-G03.8                                                                                                                                                                                                                                                                                                                                                                                                                                                                                                                                                                                                                                                                                                                                                                                                                                                                                                                                                                                                                                                                                                              |

**eTable 2: GBD cause list and associated ICD9 and ICD10 codes (continued).**

| Cause                                                 | Level | ICD9                                                                                                                                                   | ICD10                                                                                                                                                                                                             |
|-------------------------------------------------------|-------|--------------------------------------------------------------------------------------------------------------------------------------------------------|-------------------------------------------------------------------------------------------------------------------------------------------------------------------------------------------------------------------|
| Pneumococcal meningitis                               | 4     | 320.1                                                                                                                                                  | G00.1                                                                                                                                                                                                             |
| H influenzae type B meningitis                        | 4     | 320                                                                                                                                                    | G00.0                                                                                                                                                                                                             |
| Meningococcal meningitis                              | 4     | 036-036.40, 036.5, 036.8-036.9                                                                                                                         | A39-A39.4, A39.8-A39.9                                                                                                                                                                                            |
| Other meningitis                                      | 4     | 047-049.9, 320.2-320.89, 321-322.9                                                                                                                     | A87-A87.9, D86.81, G00.2-G00.8, G03-G03.8                                                                                                                                                                         |
| Encephalitis                                          | 3-4   | 062-064.9, 139.0, 323, 323.4-323.9                                                                                                                     | A83-A86.4, B94.1, F07.1, G04-G05.8                                                                                                                                                                                |
| Diphtheria                                            | 3-4   | 032-032.9                                                                                                                                              | A36-A36.9                                                                                                                                                                                                         |
| Whooping cough                                        | 3-4   | 033-033.9, 484.3-484.4                                                                                                                                 | A37-A37.91                                                                                                                                                                                                        |
| Tetanus                                               | 3-4   | 037-037.9, 771.3                                                                                                                                       | A33-A35.0                                                                                                                                                                                                         |
| Measles                                               | 3-4   | 055-055.9, 323.1, 484.0                                                                                                                                | B05-B05.9                                                                                                                                                                                                         |
| Varicella and herpes zoster                           | 3-4   | 052-053.9                                                                                                                                              | B01-B02.9, P35.8                                                                                                                                                                                                  |
| Neglected tropical diseases and malaria               | 2     | 030-030.9, 060-061.8, 065-066.9, 071-071.9, 080, 080.2-083.9, 084.0-084.5, 084.7-084.9, 085.0, 086-088.9, 120-124.9, 125.4-125.9, 127-127.1, 128-129.0 | A30-A30.9, A68-A68.9, A69.2-A69.9, A75-A75.9, A77-A79.9, A82-A82.9, A90-A96.9, A98-A98.8, B33.0-B33.1, B50-B53.8, B55.0, B56-B57.5, B60-B60.8, B65-B67.99, B69-B72.0, B74.3-B75, B77-B77.9, B83-B83.8, B92, P37.1 |
| Malaria                                               | 3-4   | 084.0-084.5, 084.7-084.9                                                                                                                               | B50-B53.8                                                                                                                                                                                                         |
| Chagas disease                                        | 3-4   | 086-086.2, 086.9                                                                                                                                       | B57-B57.5                                                                                                                                                                                                         |
| Leishmaniasis                                         | 3     | 85                                                                                                                                                     | B55.0                                                                                                                                                                                                             |
| Visceral leishmaniasis                                | 4     | 85                                                                                                                                                     | B55.0                                                                                                                                                                                                             |
| African trypanosomiasis                               | 3-4   | 086.3-086.5                                                                                                                                            | B56-B56.9                                                                                                                                                                                                         |
| Schistosomiasis                                       | 3-4   | 120-120.9                                                                                                                                              | B65-B65.9                                                                                                                                                                                                         |
| Cysticercosis                                         | 3-4   | 123.1                                                                                                                                                  | B69-B69.9                                                                                                                                                                                                         |
| Cystic echinococcosis                                 | 3-4   | 122-122.4, 122.8-122.9                                                                                                                                 | B67-B67.4, B67.8-B67.99                                                                                                                                                                                           |
| Dengue                                                | 3-4   | 061-061.8                                                                                                                                              | A90-A91.9                                                                                                                                                                                                         |
| Yellow fever                                          | 3-4   | 060-060.9                                                                                                                                              | A95-A95.9                                                                                                                                                                                                         |
| Rabies                                                | 3-4   | 071-071.9                                                                                                                                              | A82-A82.9                                                                                                                                                                                                         |
| Intestinal nematode infections                        | 3     | 127                                                                                                                                                    | B77-B77.9                                                                                                                                                                                                         |
| Ascariasis                                            | 4     | 127                                                                                                                                                    | B77-B77.9                                                                                                                                                                                                         |
| Ebola                                                 | 3-4   |                                                                                                                                                        | A98.4                                                                                                                                                                                                             |
| Other neglected tropical diseases                     | 3-4   | 065-066.9, 080, 080.2-083.9, 087-088.9, 122.5-122.7, 123-123.0, 123.2-124.9, 125.4-125.9, 127, 127.1, 128-129.0                                        | A68-A68.9, A69.2-A69.9, A75-A75.9, A77-A79.9, A92-A94.0, A96-A96.9, A98-A98.3, A98.5-A98.8, B33.0-B33.1, B60-B60.8, B67.5-B67.7, B70-B72.0, B74.3-B75, B83-B83.8, P37.1                                           |
| Maternal disorders                                    | 2     | 630-636.92, 638-638.92, 640-679.14                                                                                                                     | N96, N98-N98.9, O00-O07.9, O09-O16.9, O20-O26.93, O28-O36.93, O40-O48.1, O60-O77.9, O80-O92.79, O96-O99.91                                                                                                        |
| Maternal hemorrhage                                   | 3-4   | 640-641.93, 661-661.93, 665, 666-666.9                                                                                                                 | O20-O20.9, O43.2-O43.239, O44-O46.93, O62-O62.9, O67-O67.9, O70, O72-O72.3                                                                                                                                        |
| Maternal sepsis and other maternal infections         | 3-4   | 659.3-659.33, 670-670.9                                                                                                                                | O23-O23.93, O85-O86.89, O91-O91.23                                                                                                                                                                                |
| Maternal hypertensive disorders                       | 3-4   | 642-642.94                                                                                                                                             | O10-O16.9                                                                                                                                                                                                         |
| Maternal obstructed labor and uterine rupture         | 3-4   | 652-653.93, 660-660.93, 665.0-665.34                                                                                                                   | O32-O33.9, O64-O66.9, O71-O71.9                                                                                                                                                                                   |
| Maternal abortion, miscarriage, and ectopic pregnancy | 3-4   | 630-636.92, 638-638.92, 646.3-646.33                                                                                                                   | N96, O00-O07.9                                                                                                                                                                                                    |
| Indirect maternal deaths                              | 3-4   | 646-646.24, 646.4-649.9, 674-674.94                                                                                                                    | O24-O25.3, O98-O99.91                                                                                                                                                                                             |
| Late maternal deaths                                  | 3-4   |                                                                                                                                                        | O96-O97.9                                                                                                                                                                                                         |
| Maternal deaths aggravated by HIV/AIDS                | 3-4   |                                                                                                                                                        |                                                                                                                                                                                                                   |
| Other maternal disorders                              | 3-4   | 643-645.23, 650-651.93, 654-659.23, 659.4-659.93, 662-664.94, 665.4-665.94, 667-669.94, 671-673.9, 675-679.14                                          | N98-N98.9, O09-O09.93, O21-O22.93, O26-O26.93, O28-O31.8, O34-O36.93, O40-O43.199, O43.8-O43.93, O47-O48.1, O60-O61.9, O63-O63.9, O68-O69.9, O70.0-O70.9, O73-O77.9, O80-O84.9, O87-O90.9, O92-O92.79             |
| Neonatal disorders                                    | 2     | 760-760.64, 760.8-768, 768.2-770, 770.1-771, 771.4-775, 775.4-779.34, 779.6-779.89                                                                     | P00-P04.2, P04.5-P05.9, P07-P15.9, P19-P22.9, P24-P29.9, P36-P36.9, P38-P39.9, P50-P61.9, P70, P70.3-P72.9, P74-P78.9, P80-P81.9, P83-P84, P90-P94.9, P96, P96.3-P96.4, P96.8-P96.89                              |
| Neonatal preterm birth complications                  | 3-4   | 761.0-761.1, 765-765.9, 769-769.9, 770.2-770.9, 776.6, 777.5-777.6                                                                                     | P01.0-P01.1, P07-P07.39, P22-P22.9, P25-P28.9, P61.2, P77-P77.9                                                                                                                                                   |

**eTable 2: GBD cause list and associated ICD9 and ICD10 codes (continued).**

| Cause                                                            | Level | ICD9                                                                                                                                                                                                                                                                                                                                                                           | ICD10                                                                                                                                                                                                                                                                                                                                                                                                                                                                                                          |
|------------------------------------------------------------------|-------|--------------------------------------------------------------------------------------------------------------------------------------------------------------------------------------------------------------------------------------------------------------------------------------------------------------------------------------------------------------------------------|----------------------------------------------------------------------------------------------------------------------------------------------------------------------------------------------------------------------------------------------------------------------------------------------------------------------------------------------------------------------------------------------------------------------------------------------------------------------------------------------------------------|
| Neonatal encephalopathy due to birth asphyxia and trauma         | 3-4   | 761.7-763.9, 767-768, 768.2-768.9, 770.1-770.18, 772.1-772.9, 779.0-779.2                                                                                                                                                                                                                                                                                                      | P01.7, P02-P03.9, P10-P15.9, P20-P21.9, P24-P24.9, P90-P91.9                                                                                                                                                                                                                                                                                                                                                                                                                                                   |
| Neonatal sepsis and other neonatal infections                    | 3-4   | 771.4-771.9                                                                                                                                                                                                                                                                                                                                                                    | P36-P36.9, P38-P39.9                                                                                                                                                                                                                                                                                                                                                                                                                                                                                           |
| Hemolytic disease and other neonatal jaundice                    | 3-4   | 773-774.9                                                                                                                                                                                                                                                                                                                                                                      | P55-P59.9                                                                                                                                                                                                                                                                                                                                                                                                                                                                                                      |
| Other neonatal disorders                                         | 3-4   | 760-760.64, 760.8-761, 761.2-761.6, 764-764.99, 766-766.9, 770, 771, 772-772.0, 775, 775.4-776.5, 776.7-777.4, 777.7-779, 779.3-779.34, 779.6-779.89                                                                                                                                                                                                                           | P00-P01, P01.2-P01.6, P01.8-P01.9, P04-P04.2, P04.5-P05.9, P08-P09, P19-P19.9, P29-P29.9, P50-P54.9, P60-P61.1, P61.3-P61.9, P70, P70.3-P72.9, P74-P76.9, P78-P78.9, P80-P81.9, P83-P84, P92-P94.9, P96, P96.3-P96.4, P96.8-P96.89                                                                                                                                                                                                                                                                             |
| Nutritional deficiencies                                         | 2     | 244.2, 260-263.9, 265-269.9, 280.1-280.8, 281.0-281.9, 716.0-716.09                                                                                                                                                                                                                                                                                                            | D50.1-D50.8, D51-D52.0, D52.8-D53.9, D64.3, E00-E02, E40-E46.9, E51-E61.9, E63-E64.0, E64.2-E64.9, M12.1-M12.19                                                                                                                                                                                                                                                                                                                                                                                                |
| Protein-energy malnutrition                                      | 3-4   | 260-263.9                                                                                                                                                                                                                                                                                                                                                                      | E40-E46.9, E64.0                                                                                                                                                                                                                                                                                                                                                                                                                                                                                               |
| Iodine deficiency                                                | 3-4   | 244.2                                                                                                                                                                                                                                                                                                                                                                          | E00-E02                                                                                                                                                                                                                                                                                                                                                                                                                                                                                                        |
| Iron-deficiency anemia                                           | 3-4   | 280.1-280.8                                                                                                                                                                                                                                                                                                                                                                    | D50.1-D50.8, D64.3                                                                                                                                                                                                                                                                                                                                                                                                                                                                                             |
| Other nutritional deficiencies                                   | 3-4   | 265-269.9, 281.0-281.9, 716.0-716.09                                                                                                                                                                                                                                                                                                                                           | D51-D52.0, D52.8-D53.9, E51-E61.9, E63-E64, E64.2-E64.3, M12.1-M12.19                                                                                                                                                                                                                                                                                                                                                                                                                                          |
| Other communicable, maternal, neonatal, and nutritional diseases | 2     | 020-029, 034-034.9, 039-039.4, 039.8-040, 040.1-041.09, 045-046.9, 050-051.9, 054-054.9, 056-059.9, 070-070.21, 070.3-070.31, 070.4-070.43, 070.49-070.53, 070.59-070.9, 072-073, 073.7-074.1, 074.20, 074.3-075.9, 078.4-078.7, 079-079.7, 080.0, 090-101.6, 104-104.9, 136-136.29, 138, 139, 323.0-323.02, 323.2-323.3, 390-390.9, 392, 392.9, 484.5, 613-614.9, 771.0-771.2 | A20-A28.9, A32-A32.9, A38-A38.9, A48.2, A48.4-A48.52, A49.1, A50-A58, A60-A60.9, A63-A63.8, A65-A65.0, A69-A69.1, A74, A74.8-A74.9, A80-A81.9, A88-A89.9, B00-B00.9, B03-B04, B06-B06.9, B10-B10.89, B15-B17.9, B19-B19.9, B25-B27.99, B29.4, B33, B33.3-B33.8, B47-B48.8, B63, B91, B94.2, B95-B95.5, G14-G14.6, I00, I02, I02.9, I98.0-I98.1, J02.0, J03.0-J03.01, K67.0-K67.2, K67.8, K74.7-K74.8, M03.1, M49.1, M73.0-M73.1, M89.6-M89.69, N70-N71.9, N73-N74.8, P35-P35.3, P35.9, P37, P37.2, P37.5-P37.9 |
| Sexually transmitted diseases excluding HIV                      | 3     | 054.1, 090-099.9, 613-614.9                                                                                                                                                                                                                                                                                                                                                    | A50-A58, A60-A60.9, A63-A63.8, B63, I98.0, K67.0-K67.2, M03.1, M73.0-M73.1, N70-N71.9, N73-N74.8                                                                                                                                                                                                                                                                                                                                                                                                               |
| Syphilis                                                         | 4     | 090-097.9                                                                                                                                                                                                                                                                                                                                                                      | A50-A53.9, I98.0, K67.2, M03.1, M73.1                                                                                                                                                                                                                                                                                                                                                                                                                                                                          |
| Chlamydial infection                                             | 4     | 099, 099.1-099.6                                                                                                                                                                                                                                                                                                                                                               | A55-A56.8, K67.0                                                                                                                                                                                                                                                                                                                                                                                                                                                                                               |
| Gonococcal infection                                             | 4     | 098-098.9                                                                                                                                                                                                                                                                                                                                                                      | A54-A54.9, K67.1, M73.0                                                                                                                                                                                                                                                                                                                                                                                                                                                                                        |
| Other sexually transmitted diseases                              | 4     | 099.0, 099.8-099.9                                                                                                                                                                                                                                                                                                                                                             | A57-A58, A63-A63.8                                                                                                                                                                                                                                                                                                                                                                                                                                                                                             |
| Hepatitis                                                        | 3-4   | 070-070.21, 070.3-070.31, 070.4-070.43, 070.49-070.53, 070.59-070.9                                                                                                                                                                                                                                                                                                            | B15-B17.9, B19-B19.9, B94.2, P35.3                                                                                                                                                                                                                                                                                                                                                                                                                                                                             |
| Other infectious diseases                                        | 3-4   | 020-029, 034-034.9, 039-039.4, 039.8-040, 040.1-041.09, 045-046.9, 050-051.9, 054-054.0, 054.10-054.9, 056-059.9, 072-073, 073.7-074.1, 074.20, 074.3-075.9, 078.4-078.7, 079-079.7, 080.0, 100-101.6, 104-104.9, 136-136.29, 138, 139, 323.0-323.02, 323.2-323.3, 390-390.9, 392, 392.9, 484.5, 771.0-771.2                                                                   | A20-A28.9, A32-A32.9, A38-A38.9, A48.2, A48.4-A48.52, A49.1, A65-A65.0, A69-A69.1, A74, A74.8-A74.9, A80-A81.9, A88-A89.9, B00-B00.9, B03-B04, B06-B06.9, B10-B10.89, B25-B27.99, B29.4, B33, B33.3-B33.8, B47-B48.8, B91, B95-B95.5, G14-G14.6, I00, I02, I02.9, I98.1, J02.0, J03.0-J03.01, K67.8, K74.7-K74.8, M49.1, M89.6-M89.69, P35-P35.2, P35.9, P37, P37.2, P37.5-P37.9                                                                                                                               |
| Non-communicable diseases                                        | 1     | 035-035.9, 036.41-036.43, 036.6, 070.22-070.23, 070.32-070.33, 070.44, 070.54, 074.2, 074.21-074.23, 102-103.9, 133-133.6, 135-135.9, 136.6, 140-148.9                                                                                                                                                                                                                         | A39.5-A39.53, A46-A46.0, A66-A67.9, B18-B18.9, B33.2-B33.24, B86, C0-C13.9, C15-C25.9, C3-C34.92, C37-C38.8, C4-C41.9, C43-C45.9                                                                                                                                                                                                                                                                                                                                                                               |



eTable 2: GBD cause list and associated ICD9 and ICD10 codes (continued).

| Cause                                    | Level | ICD9                                                                                                                                                                                                                                                                                                                                                                                                                                                                                                                                                                                                                                                                                                                                                                                                                                                                                                                                                                                                                                                                                                                                                                                                                                                                                                                                                                                                                                                                                                                                                                                                                                                                                                                                                                                                                                                                                                     | ICD10                                                                                                                                                                                                                                                                                                                                                                                                                                                                                                                                                                                                                                                                                                                                                                                                                                                                                                                                                                                                                                                                                                                                                                                                                                                                                                                                                                                                                                                                                                                                                                                                                                                                                                                                           |
|------------------------------------------|-------|----------------------------------------------------------------------------------------------------------------------------------------------------------------------------------------------------------------------------------------------------------------------------------------------------------------------------------------------------------------------------------------------------------------------------------------------------------------------------------------------------------------------------------------------------------------------------------------------------------------------------------------------------------------------------------------------------------------------------------------------------------------------------------------------------------------------------------------------------------------------------------------------------------------------------------------------------------------------------------------------------------------------------------------------------------------------------------------------------------------------------------------------------------------------------------------------------------------------------------------------------------------------------------------------------------------------------------------------------------------------------------------------------------------------------------------------------------------------------------------------------------------------------------------------------------------------------------------------------------------------------------------------------------------------------------------------------------------------------------------------------------------------------------------------------------------------------------------------------------------------------------------------------------|-------------------------------------------------------------------------------------------------------------------------------------------------------------------------------------------------------------------------------------------------------------------------------------------------------------------------------------------------------------------------------------------------------------------------------------------------------------------------------------------------------------------------------------------------------------------------------------------------------------------------------------------------------------------------------------------------------------------------------------------------------------------------------------------------------------------------------------------------------------------------------------------------------------------------------------------------------------------------------------------------------------------------------------------------------------------------------------------------------------------------------------------------------------------------------------------------------------------------------------------------------------------------------------------------------------------------------------------------------------------------------------------------------------------------------------------------------------------------------------------------------------------------------------------------------------------------------------------------------------------------------------------------------------------------------------------------------------------------------------------------|
| Non-communicable diseases<br>(continued) | 1     | 150-158.9, 160-164.9, 170-175.9, 180-183.8, 184.0-184.4, 184.8, 185-186.9, 187.1-187.8, 188-188.9, 189.0-189.8, 190-194.8, 200-208.92, 209.0-209.17, 209.21-209.27, 209.31-209.57, 209.61, 209.63-209.67, 210.0-210.9, 211.0-211.8, 212.0-212.8, 213-213.9, 217-220.9, 221.0-221.8, 222.0-222.8, 223.0-223.89, 224-228.9, 229.0, 229.8, 230.1-230.8, 231.0-231.2, 232-232.9, 233.0-233.2, 233.31-233.32, 233.4-233.5, 233.7, 234.0-234.8, 235.0, 235.4, 235.6-235.8, 236.0-236.2, 236.4-236.5, 236.7, 236.91-237.3, 237.5-237.9, 238.0-238.5, 239.2-239.4, 239.6, 240-243.9, 244.0-244.1, 244.3-244.8, 245-246.9, 250-259.9, 270-273.9, 275-276, 277-277.2, 277.4-277.9, 278.0-278.8, 282-284.9, 286-286.5, 286.7-289.7, 290-292.9, 294.1-295.95, 303-303.93, 304.0-304.83, 305-305.93, 307.1, 307.51, 307.54, 327.2-327.8, 330-331.2, 331.5-337.9, 340-341.9, 345-345.91, 349-349.8, 353.6-353.9, 356-356.9, 357.0-357.7, 358-359.9, 376.0-376.1, 391-391.9, 392.0, 393-398.99, 402-404.93, 410-414.9, 416.1, 417-417.9, 420-423, 423.1-425.9, 427-427.32, 427.6-427.89, 429.0-429.1, 430-435.9, 437.0-437.2, 437.4-437.8, 441-443.9, 446-457.9, 459, 459.1-459.39, 470, 470.9-474.9, 476-476.1, 477-479, 490-504.9, 506-506.9, 508-509, 515, 516-517.8, 518.6-518.7, 518.9, 519.0-519.4, 530-536.1, 536.4-536.49, 537-537.6, 537.8-537.84, 538-543.9, 550-553.6, 555-558.9, 560-560.39, 560.8-560.9, 562-562.13, 564-564.7, 565-566.9, 569.0-569.44, 569.5-569.71, 569.84-569.85, 571-571.9, 572.3-572.9, 573.0-573.4, 573.8-577.9, 579-583.9, 585-585.9, 588-590.9, 592-593.89, 594-599.69, 599.8-599.89, 601-602.9, 604-604.99, 608.2-608.24, 610-610.9, 617-618.9, 620-620.9, 621.4-621.9, 622.3-622.7, 629-629.81, 680-689, 694-695.59, 707-707.9, 710-711.99, 714-714.33, 714.8-714.9, 728.86, 728.88, 730.1-730.19, 732-732.9, 733.0-733.19, 740-749.04, 749.2-758.9, 759.0-759.89, 760.7-760.79 | C47-C54.9, C56-C57.8, C58-C58.0, C60-C63.8, C64-C67.9, C68.0-C68.8, C69-C75.8, C81-C86.6, C88-C96.9, D00.00-D00.2, D01.0-D01.3, D02.0-D02.3, D03-D06.9, D07.0-D07.2, D07.4-D07.5, D09.0, D09.2-D09.3, D09.8, D10.0-D10.7, D11-D12.9, D13.0-D13.7, D14.0-D14.32, D15-D16.9, D22-D27.9, D28.0-D28.7, D29.0-D29.8, D30.0-D30.8, D31-D36, D36.1-D36.7, D37.01-D37.5, D38.0-D38.5, D39.1-D39.2, D39.8, D40.0-D40.8, D41.0-D41.8, D42-D43.9, D44.0-D44.8, D45-D45.9, D47-D47.0, D47.2-D47.9, D48.0-D48.62, D49.2-D49.4, D49.6, D49.81, D52.1, D55-D58.9, D59.0-D59.3, D59.5-D59.6, D60-D61.9, D63.1, D64.0, D64.4, D66-D67, D68.0-D69.8, D70-D75.89, D76-D78.89, D86-D86.8, D86.82-D86.9, D89-D89.3, E03-E07.1, E09-E14.9, E15.0, E16.0-E16.9, E20-E34.8, E36-E36.8, E65-E68, E70-E85.29, E87.71, E88-E89.9, F00-F03.91, F06.2, F10-F16.99, F18-F29.9, F50.0-F50.5, G10-G13.8, G20-G26.0, G30-G31.9, G35-G37.9, G40-G41.9, G45-G46.8, G47.3-G47.39, G61-G61.9, G70-G73.7, G90-G90.9, G93.7, G95-G95.9, G97-G97.9, H05.0-H05.119, I01-I01.9, I02.0, I05-I09.9, I11-I13.9, I20-I25.9, I27.1, I28-I28.8, I30-I31.1, I31.8-I43.9, I47-I48.92, I51.0-I51.5, I60-I61.9, I62.0-I62.03, I63-I63.9, I65-I66.9, I67.0-I67.3, I67.5-I67.7, I68.0-I68.2, I69.0-I69.398, I70.2-I70.799, I71-I73.9, I77-I89.9, I91.9, I95.2-I95.3, I97-I98, I98.2, I98.9, J30-J35.9, J37-J47.9, J60-J63.8, J65-J68.9, J70-J70.9, J82, J84-J84.9, J91-J92.9, J95-J95.9, K20-K29.91, K31-K31.89, K35-K38.9, K40-K46.9, K50-K52.9, K55-K62.9, K63.5, K64-K64.9, K66.8, K67, K68-K68.9, K70-K70.9, K71.3-K71.51, K71.7, K72.1-K74.69, K74.9, K75.2-K77.8, K80-K83.9, K85-K86.9, K90-K91.9, K92.8-K92.89, K94-K95.89, L00-L05.92, L08-L08.9, L10-L14.0, L51-L51.9, L88-L89.95, L93-L93.2 |
| Non-communicable diseases<br>(continued) | 1     | 775.0-775.3, 779.4-779.5, 780.57, 780.59, 780.62-780.63, 786.03, 787.1, 788.0, 790.2-790.22, 790.3, 798-798.0, E850-E850.29, E850.9-E854.39, E860-E860.19                                                                                                                                                                                                                                                                                                                                                                                                                                                                                                                                                                                                                                                                                                                                                                                                                                                                                                                                                                                                                                                                                                                                                                                                                                                                                                                                                                                                                                                                                                                                                                                                                                                                                                                                                | L97-L98.499, M00-M03.0, M03.2-M03.6, M05-M09.8, M30-M36.8, M40-M43.19, M65-M65.08, M71.0-M71.19, M80-M82.8, M86.3-M86.49, M87-M87.19, M88-M89.09, M89.5-M89.59, M89.7-M89.9, N00-N08.8, N10-N12.9, N14-N16.8, N18-N18.9, N20-N23.0, N25-N32.0, N32.3-N32.4, N34-N34.3, N36-N36.9, N39-N39.2, N41-N41.9, N44-N44.04, N45-N45.9, N49-N49.9, N60-N60.99, N65-N65.1, N72-N72.0, N75-N77.8, N80-N81.9, N83-N83.9, N84.0-N84.1, N87-N87.9, N99-N99.9, P04.3-P04.49, P70.0-P70.2, P96.0-P96.2, P96.5, Q00-Q07.9, Q10.4-Q18.9, Q20-Q28.9, Q30-Q36, Q37-Q45.9, Q50-Q87.89, Q89-Q89.8, Q90-Q93.9, Q95-Q99.8, R50.2, R50.82-R50.83, R73-R73.9, R78.0-R78.5, R95, X45-X45.9                                                                                                                                                                                                                                                                                                                                                                                                                                                                                                                                                                                                                                                                                                                                                                                                                                                                                                                                                                                                                                                                                 |

**eTable 2: GBD cause list and associated ICD9 and ICD10 codes (continued).**

| Cause                                              | Level | ICD9                                                                                                                                                                                                                                                                                                                                                                                                                                                                                                                                                                                                                                          | ICD10                                                                                                                                                                                                                                                                                                                                                                                                                                                                                                                                                                                                                                                                                   |
|----------------------------------------------------|-------|-----------------------------------------------------------------------------------------------------------------------------------------------------------------------------------------------------------------------------------------------------------------------------------------------------------------------------------------------------------------------------------------------------------------------------------------------------------------------------------------------------------------------------------------------------------------------------------------------------------------------------------------------|-----------------------------------------------------------------------------------------------------------------------------------------------------------------------------------------------------------------------------------------------------------------------------------------------------------------------------------------------------------------------------------------------------------------------------------------------------------------------------------------------------------------------------------------------------------------------------------------------------------------------------------------------------------------------------------------|
| Neoplasms                                          | 2     | 140-148.9, 150-158.9, 160-164.9, 170-175.9, 180-183.8, 184.0-184.4, 184.8, 185-186.9, 187.1-187.8, 188-188.9, 189.0-189.8, 190-194.8, 200-208.92, 209.0-209.17, 209.21-209.27, 209.31-209.57, 209.61, 209.63-209.67, 210.0-210.9, 211.0-211.8, 212.0-212.8, 213-213.9, 217-217.8, 219.0, 220-220.9, 221.0-221.8, 222.0-222.8, 223.0-223.89, 224-228.9, 229.0, 229.8, 230.1-230.8, 231.0-231.2, 232-232.9, 233.0-233.2, 233.31-233.32, 233.4-233.5, 233.7, 234.0-234.8, 235.0, 235.4, 235.6-235.8, 236.1-236.2, 236.4-236.5, 236.7, 236.91-237.3, 237.5-237.9, 238.0-238.5, 239.2-239.4, 239.6, 569.0, 569.43-569.44, 569.84-569.85, 610-610.9 | C0-C13.9, C15-C25.9, C3-C34.92, C37-C38.8, C4-C41.9, C43-C45.9, C47-C54.9, C56-C57.8, C58-C58.0, C60-C63.8, C64-C67.9, C68.0-C68.8, C69-C75.8, C81-C86.6, C88-C96.9, D00.00-D00.2, D01.0-D01.3, D02.0-D02.3, D03-D06.9, D07.0-D07.2, D07.4-D07.5, D09.0, D09.2-D09.3, D09.8, D10.0-D10.7, D11-D12.9, D13.0-D13.7, D14.0-D14.32, D15-D16.9, D22-D24.9, D26.0, D27-D27.9, D28.0-D28.1, D28.7, D29.0-D29.8, D30.0-D30.8, D31-D36, D36.1-D36.7, D37.01-D37.5, D38.0-D38.5, D39.1-D39.2, D39.8, D40.0-D40.8, D41.0-D41.8, D42-D43.9, D44.0-D44.8, D45-D45.9, D47-D47.0, D47.2-D47.9, D48.0-D48.62, D49.2-D49.4, D49.6, D49.81, K31.7, K62.0-K62.1, K63.5, N60-N60.99, N84.0-N84.1, N87-N87.9 |
| Lip and oral cavity cancer                         | 3-4   | 140-145.9, 210.0-210.6, 235.0                                                                                                                                                                                                                                                                                                                                                                                                                                                                                                                                                                                                                 | C0-C08.9, D00.00-D00.07, D10.0-D10.5, D11-D11.9, D37.01-D37.04, D37.09                                                                                                                                                                                                                                                                                                                                                                                                                                                                                                                                                                                                                  |
| Nasopharynx cancer                                 | 3-4   | 147-147.9, 210.7-210.9                                                                                                                                                                                                                                                                                                                                                                                                                                                                                                                                                                                                                        | C11-C11.9, D00.08, D10.6, D37.05                                                                                                                                                                                                                                                                                                                                                                                                                                                                                                                                                                                                                                                        |
| Other pharynx cancer                               | 3-4   | 146-146.9, 148-148.9                                                                                                                                                                                                                                                                                                                                                                                                                                                                                                                                                                                                                          | C09-C10.9, C12-C13.9, D10.7                                                                                                                                                                                                                                                                                                                                                                                                                                                                                                                                                                                                                                                             |
| Esophageal cancer                                  | 3-4   | 150-150.9, 211.0, 230.1                                                                                                                                                                                                                                                                                                                                                                                                                                                                                                                                                                                                                       | C15-C15.9, D00.1, D13.0                                                                                                                                                                                                                                                                                                                                                                                                                                                                                                                                                                                                                                                                 |
| Stomach cancer                                     | 3-4   | 151-151.9, 209.23, 209.63, 211.1, 230.2                                                                                                                                                                                                                                                                                                                                                                                                                                                                                                                                                                                                       | C16-C16.9, D00.2, D13.1, D37.1                                                                                                                                                                                                                                                                                                                                                                                                                                                                                                                                                                                                                                                          |
| Colon and rectum cancer                            | 3-4   | 153-154.9, 209.1-209.17, 209.5-209.57, 211.3-211.4, 230.3-230.6                                                                                                                                                                                                                                                                                                                                                                                                                                                                                                                                                                               | C18-C21.9, D01.0-D01.3, D12-D12.9, D37.3-D37.5                                                                                                                                                                                                                                                                                                                                                                                                                                                                                                                                                                                                                                          |
| Liver cancer                                       | 3-4   | 155-155.9, 211.5                                                                                                                                                                                                                                                                                                                                                                                                                                                                                                                                                                                                                              | C22-C22.9, D13.4                                                                                                                                                                                                                                                                                                                                                                                                                                                                                                                                                                                                                                                                        |
| Gallbladder and biliary tract cancer               | 3-4   | 156-156.9, 209.25-209.27, 209.65-209.67                                                                                                                                                                                                                                                                                                                                                                                                                                                                                                                                                                                                       | C23-C24.9, D13.5                                                                                                                                                                                                                                                                                                                                                                                                                                                                                                                                                                                                                                                                        |
| Pancreatic cancer                                  | 3-4   | 157-157.9, 211.6-211.7                                                                                                                                                                                                                                                                                                                                                                                                                                                                                                                                                                                                                        | C25-C25.9, D13.6-D13.7                                                                                                                                                                                                                                                                                                                                                                                                                                                                                                                                                                                                                                                                  |
| Larynx cancer                                      | 3-4   | 161-161.9, 212.1, 231.0, 235.6                                                                                                                                                                                                                                                                                                                                                                                                                                                                                                                                                                                                                | C32-C32.9, D02.0, D14.1, D38.0                                                                                                                                                                                                                                                                                                                                                                                                                                                                                                                                                                                                                                                          |
| Tracheal, bronchus, and lung cancer                | 3-4   | 162-162.9, 209.21, 209.61, 212.2-212.3, 231.1-231.2, 235.7                                                                                                                                                                                                                                                                                                                                                                                                                                                                                                                                                                                    | C33-C34.92, D02.1-D02.3, D14.2-D14.32, D38.1                                                                                                                                                                                                                                                                                                                                                                                                                                                                                                                                                                                                                                            |
| Malignant skin melanoma                            | 3-4   | 172-172.9                                                                                                                                                                                                                                                                                                                                                                                                                                                                                                                                                                                                                                     | C43-C43.9, D03-D03.9, D22-D23.9, D48.5                                                                                                                                                                                                                                                                                                                                                                                                                                                                                                                                                                                                                                                  |
| Non-melanoma skin cancer                           | 3     | 173-173.99, 222.4, 232-232.9, 238.2                                                                                                                                                                                                                                                                                                                                                                                                                                                                                                                                                                                                           | C44-C44.99, D04-D04.9, D49.2                                                                                                                                                                                                                                                                                                                                                                                                                                                                                                                                                                                                                                                            |
| Non-melanoma skin cancer (squamous-cell carcinoma) | 4     | 173-173.99, 222.4, 232-232.9, 238.2                                                                                                                                                                                                                                                                                                                                                                                                                                                                                                                                                                                                           | C44-C44.99, D04-D04.9, D49.2                                                                                                                                                                                                                                                                                                                                                                                                                                                                                                                                                                                                                                                            |
| Breast cancer                                      | 3-4   | 174-175.9, 217-217.8, 233.0, 238.3, 239.3, 610-610.9                                                                                                                                                                                                                                                                                                                                                                                                                                                                                                                                                                                          | C50-C50.929, D05-D05.92, D24-D24.9, D48.6-D48.62, D49.3, N60-N60.99                                                                                                                                                                                                                                                                                                                                                                                                                                                                                                                                                                                                                     |
| Cervical cancer                                    | 3-4   | 180-180.9, 219.0, 233.1                                                                                                                                                                                                                                                                                                                                                                                                                                                                                                                                                                                                                       | C53-C53.9, D06-D06.9, D26.0                                                                                                                                                                                                                                                                                                                                                                                                                                                                                                                                                                                                                                                             |
| Uterine cancer                                     | 3-4   | 182-182.8, 233.2                                                                                                                                                                                                                                                                                                                                                                                                                                                                                                                                                                                                                              | C54-C54.9, D07.0-D07.2, N87-N87.9                                                                                                                                                                                                                                                                                                                                                                                                                                                                                                                                                                                                                                                       |
| Ovarian cancer                                     | 3-4   | 183-183.0, 220-220.9, 236.2                                                                                                                                                                                                                                                                                                                                                                                                                                                                                                                                                                                                                   | C56-C56.9, D27-D27.9, D39.1-D39.12                                                                                                                                                                                                                                                                                                                                                                                                                                                                                                                                                                                                                                                      |
| Prostate cancer                                    | 3-4   | 185-185.9, 222.2, 236.5                                                                                                                                                                                                                                                                                                                                                                                                                                                                                                                                                                                                                       | C61-C61.9, D07.5, D29.1, D40.0                                                                                                                                                                                                                                                                                                                                                                                                                                                                                                                                                                                                                                                          |
| Testicular cancer                                  | 3-4   | 186-186.9, 222.0, 222.3, 236.4                                                                                                                                                                                                                                                                                                                                                                                                                                                                                                                                                                                                                | C62-C62.92, D29.2-D29.8, D40.1-D40.8                                                                                                                                                                                                                                                                                                                                                                                                                                                                                                                                                                                                                                                    |
| Kidney cancer                                      | 3-4   | 189.0-189.1, 209.24, 209.64, 223.0-223.1, 236.91                                                                                                                                                                                                                                                                                                                                                                                                                                                                                                                                                                                              | C64-C65.9, D30.0-D30.12, D41.0-D41.12                                                                                                                                                                                                                                                                                                                                                                                                                                                                                                                                                                                                                                                   |
| Bladder cancer                                     | 3-4   | 188-188.9, 223.3, 233.7, 236.7, 239.4                                                                                                                                                                                                                                                                                                                                                                                                                                                                                                                                                                                                         | C67-C67.9, D09.0, D30.3, D41.4-D41.8, D49.4                                                                                                                                                                                                                                                                                                                                                                                                                                                                                                                                                                                                                                             |
| Brain and nervous system cancer                    | 3-4   | 191-192.9                                                                                                                                                                                                                                                                                                                                                                                                                                                                                                                                                                                                                                     | C70-C72.9                                                                                                                                                                                                                                                                                                                                                                                                                                                                                                                                                                                                                                                                               |
| Thyroid cancer                                     | 3-4   | 193-193.9, 226-226.9                                                                                                                                                                                                                                                                                                                                                                                                                                                                                                                                                                                                                          | C73-C73.9, D09.3, D09.8, D34-D34.9, D44.0                                                                                                                                                                                                                                                                                                                                                                                                                                                                                                                                                                                                                                               |
| Mesothelioma                                       | 3-4   | 158.9, 163-163.9, 212.4                                                                                                                                                                                                                                                                                                                                                                                                                                                                                                                                                                                                                       | C45-C45.9                                                                                                                                                                                                                                                                                                                                                                                                                                                                                                                                                                                                                                                                               |
| Hodgkin lymphoma                                   | 3-4   | 201-201.98                                                                                                                                                                                                                                                                                                                                                                                                                                                                                                                                                                                                                                    | C81-C81.99                                                                                                                                                                                                                                                                                                                                                                                                                                                                                                                                                                                                                                                                              |
| Non-Hodgkin lymphoma                               | 3-4   | 200-200.9, 202-202.98                                                                                                                                                                                                                                                                                                                                                                                                                                                                                                                                                                                                                         | C82-C86.6, C96-C96.9                                                                                                                                                                                                                                                                                                                                                                                                                                                                                                                                                                                                                                                                    |
| Multiple myeloma                                   | 3-4   | 203-203.9                                                                                                                                                                                                                                                                                                                                                                                                                                                                                                                                                                                                                                     | C88-C90.9                                                                                                                                                                                                                                                                                                                                                                                                                                                                                                                                                                                                                                                                               |
| Leukemia                                           | 3     | 204-208.92                                                                                                                                                                                                                                                                                                                                                                                                                                                                                                                                                                                                                                    | C91-C95.92                                                                                                                                                                                                                                                                                                                                                                                                                                                                                                                                                                                                                                                                              |
| Acute lymphoid leukemia                            | 4     | 204.0-204.02                                                                                                                                                                                                                                                                                                                                                                                                                                                                                                                                                                                                                                  | C91.0-C91.02                                                                                                                                                                                                                                                                                                                                                                                                                                                                                                                                                                                                                                                                            |
| Chronic lymphoid leukemia                          | 4     | 204.1-204.12                                                                                                                                                                                                                                                                                                                                                                                                                                                                                                                                                                                                                                  | C91.1-C91.12                                                                                                                                                                                                                                                                                                                                                                                                                                                                                                                                                                                                                                                                            |
| Acute myeloid leukemia                             | 4     | 205.0-205.02, 205.3-205.32, 206.0-206.02, 207.0                                                                                                                                                                                                                                                                                                                                                                                                                                                                                                                                                                                               | C92.0-C92.02, C92.3-C92.62, C93.0-C93.02, C94.0-C94.02, C94.2-C94.22, C94.4-C94.5                                                                                                                                                                                                                                                                                                                                                                                                                                                                                                                                                                                                       |
| Chronic myeloid leukemia                           | 4     | 205.1-205.12, 206.1-206.12, 207.1                                                                                                                                                                                                                                                                                                                                                                                                                                                                                                                                                                                                             | C92.1-C92.12                                                                                                                                                                                                                                                                                                                                                                                                                                                                                                                                                                                                                                                                            |

eTable 2: GBD cause list and associated ICD9 and ICD10 codes (continued).

| Cause                                               | Level | ICD9                                                                                                                                                                                                                                                                                                                                                                                                                                                                                                              | ICD10                                                                                                                                                                                                                                                                                                                                                                                                                                                                        |
|-----------------------------------------------------|-------|-------------------------------------------------------------------------------------------------------------------------------------------------------------------------------------------------------------------------------------------------------------------------------------------------------------------------------------------------------------------------------------------------------------------------------------------------------------------------------------------------------------------|------------------------------------------------------------------------------------------------------------------------------------------------------------------------------------------------------------------------------------------------------------------------------------------------------------------------------------------------------------------------------------------------------------------------------------------------------------------------------|
| Other neoplasms                                     | 3-4   | 152-152.9, 158-158.8, 160-160.9, 164-164.9, 170-171.9, 181-181.9, 182.9, 183.2-183.8, 184.0-184.4, 184.8, 187.1-187.8, 189.2-189.8, 190-190.9, 194-194.8, 209.0-209.03, 209.22, 209.31-209.43, 211.2, 211.8, 212.0, 212.5-212.8, 213-213.9, 221.0-221.8, 222.1, 222.8, 223.2, 223.8-223.89, 224-225.9, 227-228.9, 229.0, 229.8, 230.7-230.8, 233.31-233.32, 233.4-233.5, 234.0-234.8, 235.4, 235.8, 236.1, 236.99-237.3, 237.5-237.9, 238.0-238.1, 238.4-238.5, 239.2, 239.6, 569.0, 569.43-569.44, 569.84-569.85 | C17-C17.9, C3-C31.9, C37-C38.8, C4-C41.9, C47-C5, C51-C52.9, C57-C57.8, C58-C58.0, C60-C60.9, C63-C63.8, C66-C66.9, C68.0-C68.8, C69-C7, C74-C75.8, D07.4, D09.2-D09.22, D13.2-D13.39, D14.0, D15-D16.9, D28.0-D28.1, D28.7, D29.0, D30.2-D30.22, D30.4-D30.8, D31-D33.9, D35-D36, D36.1-D36.7, D37.2, D38.2-D38.5, D39.2, D39.8, D41.2-D41.3, D42-D43.9, D44.1-D44.8, D45-D45.9, D47-D47.0, D47.2-D47.9, D48.0-D48.4, D49.6, D49.81, K31.7, K62.0-K62.1, K63.5, N84.0-N84.1 |
| Cardiovascular diseases                             | 2     | 036.41-036.43, 036.6, 074.2, 074.21-074.23, 391-391.9, 392.0, 393-398.99, 402-402.91, 410-414.9, 417-417.9, 420-423, 423.1-425.9, 427-427.32, 427.6-427.89, 429.0-429.1, 430-435.9, 437.0-437.2, 437.5-437.8, 441-443.9, 447-454.9, 456, 456.3-457.9, 459, 459.1-459.39                                                                                                                                                                                                                                           | A39.5-A39.53, B33.2-B33.24, D86.85, G45-G46.8, I01-I01.9, I02.0, I05-I09.9, I11-I11.9, I20-I25.9, I28-I28.8, I30-I31.1, I31.8-I43.9, I47-I48.92, I51.0-I51.5, I60-I61.9, I62.0-I62.03, I63-I63.9, I65-I66.9, I67.0-I67.3, I67.5-I67.6, I68.0-I68.2, I69.0-I69.398, I70.2-I70.799, I71-I73.9, I77-I83.93, I86-I89.9, I91.9, I98                                                                                                                                               |
| Rheumatic heart disease                             | 3-4   | 391-391.9, 392.0, 393-398.99                                                                                                                                                                                                                                                                                                                                                                                                                                                                                      | I01-I01.9, I02.0, I05-I09.9                                                                                                                                                                                                                                                                                                                                                                                                                                                  |
| Ischemic heart disease                              | 3-4   | 410-414.9                                                                                                                                                                                                                                                                                                                                                                                                                                                                                                         | I20-I25.9                                                                                                                                                                                                                                                                                                                                                                                                                                                                    |
| Cerebrovascular disease                             | 3     | 430-435.9, 437.0-437.2, 437.5-437.8                                                                                                                                                                                                                                                                                                                                                                                                                                                                               | G45-G46.8, I60-I61.9, I62.0-I62.03, I63-I63.9, I65-I66.9, I67.0-I67.3, I67.5-I67.6, I68.1-I68.2, I69.0-I69.398                                                                                                                                                                                                                                                                                                                                                               |
| Ischemic stroke                                     | 4     | 433-435.9, 437.0-437.1, 437.5-437.8                                                                                                                                                                                                                                                                                                                                                                                                                                                                               | G45-G46.8, I63-I63.9, I65-I66.9, I67.2-I67.3, I67.5-I67.6, I69.3-I69.398                                                                                                                                                                                                                                                                                                                                                                                                     |
| Hemorrhagic stroke                                  | 4     | 430-432.9, 437.2                                                                                                                                                                                                                                                                                                                                                                                                                                                                                                  | I60-I61.9, I62.0-I62.03, I67.0-I67.1, I68.1-I68.2, I69.0-I69.298                                                                                                                                                                                                                                                                                                                                                                                                             |
| Hypertensive heart disease                          | 3-4   | 402-402.91                                                                                                                                                                                                                                                                                                                                                                                                                                                                                                        | I11-I11.9                                                                                                                                                                                                                                                                                                                                                                                                                                                                    |
| Cardiomyopathy and myocarditis                      | 3-4   | 036.43, 036.6, 074.23, 422-422.99, 425-425.9, 429.0-429.1                                                                                                                                                                                                                                                                                                                                                                                                                                                         | A39.52, B33.2-B33.24, D86.85, I40-I43.9, I51.4-I51.5                                                                                                                                                                                                                                                                                                                                                                                                                         |
| Atrial fibrillation and flutter                     | 3-4   | 427.3-427.32                                                                                                                                                                                                                                                                                                                                                                                                                                                                                                      | I48-I48.92                                                                                                                                                                                                                                                                                                                                                                                                                                                                   |
| Aortic aneurysm                                     | 3-4   | 441-441.9                                                                                                                                                                                                                                                                                                                                                                                                                                                                                                         | I71-I71.9                                                                                                                                                                                                                                                                                                                                                                                                                                                                    |
| Peripheral vascular disease                         | 3-4   | 443.0-443.9                                                                                                                                                                                                                                                                                                                                                                                                                                                                                                       | I70.2-I70.799, I73-I73.9                                                                                                                                                                                                                                                                                                                                                                                                                                                     |
| Endocarditis                                        | 3-4   | 036.42, 074.22, 421-421.9, 424.9-424.91                                                                                                                                                                                                                                                                                                                                                                                                                                                                           | A39.51, I33-I33.9, I38-I39.9                                                                                                                                                                                                                                                                                                                                                                                                                                                 |
| Other cardiovascular and circulatory diseases       | 3-4   | 036.41, 074.2, 074.21, 417-417.9, 420-420.99, 423, 423.1-424.8, 424.99, 427-427.2, 427.6-427.89, 442-443, 447-454.9, 456, 456.3-457.9, 459, 459.1-459.39                                                                                                                                                                                                                                                                                                                                                          | A39.5-A39.50, A39.53, I28-I28.8, I30-I31.1, I31.8-I32.8, I34-I37.9, I47-I47.9, I51.0-I51.3, I68.0, I72-I72.9, I77-I83.93, I86-I89.9, I91.9, I98                                                                                                                                                                                                                                                                                                                              |
| Chronic respiratory diseases                        | 2     | 135-135.9, 136.6, 327.2-327.8, 470, 470.9-474.9, 476-476.1, 477-479, 490-504.9, 506-506.9, 508-509, 515, 516-517.8, 518.6, 518.9, 519.1-519.4, 780.57, 786.03                                                                                                                                                                                                                                                                                                                                                     | D86-D86.2, D86.89-D86.9, G47.3-G47.39, J30-J35.9, J37-J47.9, J60-J63.8, J65-J68.9, J70-J70.1, J70.8-J70.9, J82, J84-J84.9, J91-J92.9                                                                                                                                                                                                                                                                                                                                         |
| Chronic obstructive pulmonary disease               | 3-4   | 490-492.9, 494-494.9, 496-499                                                                                                                                                                                                                                                                                                                                                                                                                                                                                     | J40-J44.9, J47-J47.9                                                                                                                                                                                                                                                                                                                                                                                                                                                         |
| Pneumoconiosis                                      | 3     | 500-504.9                                                                                                                                                                                                                                                                                                                                                                                                                                                                                                         | J60-J63.8, J65-J65.0, J92.0                                                                                                                                                                                                                                                                                                                                                                                                                                                  |
| Silicosis                                           | 4     | 502-502.9, 503.0, 503.9                                                                                                                                                                                                                                                                                                                                                                                                                                                                                           | J62-J62.9                                                                                                                                                                                                                                                                                                                                                                                                                                                                    |
| Asbestosis                                          | 4     | 501                                                                                                                                                                                                                                                                                                                                                                                                                                                                                                               | J61-J61.0, J92.0                                                                                                                                                                                                                                                                                                                                                                                                                                                             |
| Coal workers pneumoconiosis                         | 4     | 500-500.9, 501.0-501.9                                                                                                                                                                                                                                                                                                                                                                                                                                                                                            | J60-J60.0                                                                                                                                                                                                                                                                                                                                                                                                                                                                    |
| Other pneumoconiosis                                | 4     | 503, 503.1, 504-504.9                                                                                                                                                                                                                                                                                                                                                                                                                                                                                             | J63-J63.8, J65-J65.0                                                                                                                                                                                                                                                                                                                                                                                                                                                         |
| Asthma                                              | 3-4   | 493-493.92                                                                                                                                                                                                                                                                                                                                                                                                                                                                                                        | J45-J46.9                                                                                                                                                                                                                                                                                                                                                                                                                                                                    |
| Interstitial lung disease and pulmonary sarcoidosis | 3-4   | 135-135.9, 136.6, 515, 516-516.9                                                                                                                                                                                                                                                                                                                                                                                                                                                                                  | D86-D86.2, D86.89-D86.9, J84-J84.9                                                                                                                                                                                                                                                                                                                                                                                                                                           |
| Other chronic respiratory diseases                  | 3-4   | 327.2-327.8, 470, 470.9-474.9, 476-476.1, 477-479, 495-495.9, 506-506.9, 508-509, 517-517.8, 518.6, 518.9, 519.1-519.4, 780.57, 786.03                                                                                                                                                                                                                                                                                                                                                                            | G47.3-G47.39, J30-J35.9, J37-J39.9, J66-J68.9, J70-J70.1, J70.8-J70.9, J82, J91-J92, J92.9                                                                                                                                                                                                                                                                                                                                                                                   |
| Cirrhosis and other chronic liver diseases          | 2-4   | 070.22-070.23, 070.32-070.33, 070.44, 070.54, 456.0-456.21, 571-571.9, 572.3-572.9, 573.0-573.3, 573.8-573.9                                                                                                                                                                                                                                                                                                                                                                                                      | B18-B18.9, I85-I85.9, I98.2, K70-K70.9, K71.3-K71.51, K71.7, K72.1-K74.69, K74.9, K75.8-K76.0, K76.6-K76.7, K76.9                                                                                                                                                                                                                                                                                                                                                            |

**eTable 2: GBD cause list and associated ICD9 and ICD10 codes (continued).**

| Cause                                      | Level | ICD9                                                                                                                                                                                                                                                                      | ICD10                                                                                                                                                                                                                                                                    |
|--------------------------------------------|-------|---------------------------------------------------------------------------------------------------------------------------------------------------------------------------------------------------------------------------------------------------------------------------|--------------------------------------------------------------------------------------------------------------------------------------------------------------------------------------------------------------------------------------------------------------------------|
| Digestive diseases                         | 2     | 455-455.9, 530-536.1, 537-537.6, 537.8-537.84, 538, 540-543.9, 550-551.1, 551.3-552.1, 552.3-553.6, 555-558.9, 560-560.39, 560.8-560.9, 562-562.13, 564-564.1, 564.5-564.7, 565-566.9, 569.1-569.42, 569.5, 569.7-569.71, 573.4, 574-577.9, 579-579.2, 579.4-579.9, 787.1 | I84-I84.9, K20-K29.91, K31-K31.6, K31.8-K31.89, K35-K38.9, K40-K42.9, K44-K46.9, K50-K52.9, K55-K62, K62.2-K62.6, K62.8-K62.9, K64-K64.9, K66.8, K67, K68-K68.9, K75.2-K75.4, K76.1-K76.5, K76.8-K76.89, K77-K77.8, K80-K83.9, K85-K86.9, K90-K90.9, K92.8-K92.89, M09.1 |
| Peptic ulcer disease                       | 3-4   | 531-534.91                                                                                                                                                                                                                                                                | K25-K28.9, K31, K31.1-K31.6, K31.8, K31.82-K31.89                                                                                                                                                                                                                        |
| Gastritis and duodenitis                   | 3-4   | 535-535.9                                                                                                                                                                                                                                                                 | K29-K29.91                                                                                                                                                                                                                                                               |
| Appendicitis                               | 3-4   | 540-542.9                                                                                                                                                                                                                                                                 | K35-K37.9, K38.3-K38.9                                                                                                                                                                                                                                                   |
| Paralytic ileus and intestinal obstruction | 3-4   | 560-560.39, 560.8-560.9                                                                                                                                                                                                                                                   | K56-K56.9                                                                                                                                                                                                                                                                |
| Inguinal, femoral, and abdominal hernia    | 3-4   | 550-551.1, 551.3-552.1, 552.3-553.03, 553.6                                                                                                                                                                                                                               | K40-K42.9, K44-K46.9                                                                                                                                                                                                                                                     |
| Inflammatory bowel disease                 | 3-4   | 555-556.9, 558-558.9, 569.5                                                                                                                                                                                                                                               | K50-K52.9, M09.1                                                                                                                                                                                                                                                         |
| Vascular intestinal disorders              | 3-4   | 557-557.9                                                                                                                                                                                                                                                                 | K55-K55.9                                                                                                                                                                                                                                                                |
| Gallbladder and biliary diseases           | 3-4   | 574-576.9                                                                                                                                                                                                                                                                 | K80-K83.9                                                                                                                                                                                                                                                                |
| Pancreatitis                               | 3-4   | 577-577.9, 579.4                                                                                                                                                                                                                                                          | K85-K86.9                                                                                                                                                                                                                                                                |
| Other digestive diseases                   | 3-4   | 455-455.9, 530-530.9, 536-536.1, 537-537.6, 537.8-537.84, 538, 543-543.9, 553.1-553.3, 562-562.13, 564-564.1, 564.5-564.7, 565-566.9, 569.1-569.42, 569.7-569.71, 573.4, 579-579.2, 579.8-579.9, 787.1                                                                    | I84-I84.9, K20-K24, K31.0, K31.81-K31.819, K38-K38.2, K57-K62, K62.2-K62.6, K62.8-K62.9, K64-K64.9, K66.8, K67, K68-K68.9, K75.2-K75.4, K76.1-K76.5, K76.8-K76.89, K77-K77.8, K90-K90.9, K92.8-K92.89                                                                    |
| Neurological disorders                     | 2     | 290-290.9, 294.1-294.9, 330-331.2, 331.5-337.9, 340-341.9, 345-345.91, 349, 349.2-349.8, 353.6-353.9, 356-356.9, 357.0-357.1, 357.3-357.4, 357.7, 358-359.9, 728.86, 728.88, 775.2                                                                                        | F00-F03.91, G10-G13.8, G20-G21.0, G21.2-G24, G24.1-G25.0, G25.2-G25.3, G25.5, G25.8-G26.0, G30-G31.1, G31.8-G31.9, G35-G37.9, G40-G41.9, G61-G61.9, G70-G72, G72.2-G73.7, G90-G90.9, G95-G95.9, M33-M33.99                                                               |
| Alzheimer disease and other dementias      | 3-4   | 290-290.9, 294.1-294.9, 331-331.2                                                                                                                                                                                                                                         | F00-F03.91, G30-G31.1, G31.8-G31.9                                                                                                                                                                                                                                       |
| Parkinson disease                          | 3-4   | 332-332.9                                                                                                                                                                                                                                                                 | G20-G21.0, G21.2-G22.0                                                                                                                                                                                                                                                   |
| Epilepsy                                   | 3-4   | 345-345.91                                                                                                                                                                                                                                                                | G40-G41.9                                                                                                                                                                                                                                                                |
| Multiple sclerosis                         | 3-4   | 340-340.9                                                                                                                                                                                                                                                                 | G35-G35.9                                                                                                                                                                                                                                                                |
| Motor neuron disease                       | 3-4   | 335-335.29, 335.8-335.9                                                                                                                                                                                                                                                   | G12.2-G12.9                                                                                                                                                                                                                                                              |
| Other neurological disorders               | 3-4   | 330-330.9, 331.5-331.9, 333-334.9, 335.3, 336-337.9, 341-341.9, 349, 349.2-349.8, 353.6-353.9, 356-356.9, 357.0-357.1, 357.3-357.4, 357.7, 358-359.9, 728.86, 728.88, 775.2                                                                                               | G10-G12.1, G13-G13.8, G23-G24, G24.1-G25.0, G25.2-G25.3, G25.5, G25.8-G26.0, G36-G37.9, G61-G61.9, G70-G72, G72.2-G73.7, G90-G90.9, G95-G95.9, M33-M33.99                                                                                                                |
| Mental and substance use disorders         | 2     | 291-292.9, 295-295.95, 303-303.93, 304.0-304.83, 305-305.93, 307.1, 307.51, 307.54, 357.5, 760.7-760.79, 780.59, 790.3, E850-E850.29, E850.9-E854.39, E860-E860.19                                                                                                        | F06.2, F10-F16.99, F18-F29.9, F50.0-F50.5, G31.2, G72.1, P04.3-P04.49, P96.1, Q86.0, R78.0-R78.5, X45-X45.9                                                                                                                                                              |
| Schizophrenia                              | 3-4   | 295-295.95                                                                                                                                                                                                                                                                | F06.2, F20-F23.9, F25-F29.9                                                                                                                                                                                                                                              |
| Alcohol use disorders                      | 3-4   | 291-291.9, 303-303.93, 305.0-305.03, 357.5, 790.3, E860-E860.19                                                                                                                                                                                                           | F10-F10.99, G31.2, G72.1, P04.3, Q86.0, R78.0, X45-X45.9                                                                                                                                                                                                                 |
| Drug use disorders                         | 3     | 292-292.9, 304.0-304.83, 305, 305.1-305.93, 760.7-760.79, E850-E850.29, E850.9-E854.39                                                                                                                                                                                    | F11-F16.99, F18-F19.99, P04.4-P04.49, P96.1, R78.1-R78.5                                                                                                                                                                                                                 |
| Opioid use disorders                       | 4     | 304.0-304.03, 305.5-305.53, E850.0-E850.29                                                                                                                                                                                                                                | F11-F11.99, P96.1, R78.1                                                                                                                                                                                                                                                 |
| Cocaine use disorders                      | 4     | 304.2-304.23, 305.6-305.63                                                                                                                                                                                                                                                | F14-F14.99, R78.2                                                                                                                                                                                                                                                        |
| Amphetamine use disorders                  | 4     | 304.4-304.43, 305.7-305.73                                                                                                                                                                                                                                                | F15-F15.99                                                                                                                                                                                                                                                               |
| Other drug use disorders                   | 4     | 292-292.9, 304.1-304.13, 304.5-304.83, 305, 305.1-305.13, 305.3-305.43, 305.8-305.93                                                                                                                                                                                      | F13-F13.99, F16-F16.99, F18-F19.99, R78.3-R78.5                                                                                                                                                                                                                          |
| Eating disorders                           | 3     | 307.1, 307.51, 307.54                                                                                                                                                                                                                                                     | F50.0-F50.5                                                                                                                                                                                                                                                              |
| Anorexia nervosa                           | 4     | 307.1, 307.54                                                                                                                                                                                                                                                             | F50.0-F50.1                                                                                                                                                                                                                                                              |
| Bulimia nervosa                            | 4     | 307.51                                                                                                                                                                                                                                                                    | F50.2-F50.5                                                                                                                                                                                                                                                              |

**eTable 2: GBD cause list and associated ICD9 and ICD10 codes (continued).**

| Cause                                               | Level | ICD9                                                                                                                                                                                                                                                                                                                                                                                                                                                                                                                                                                               | ICD10                                                                                                                                                                                                                                                                                                                                                                                                                                                                                                                                                                                                                                                                                                                                                                                                              |
|-----------------------------------------------------|-------|------------------------------------------------------------------------------------------------------------------------------------------------------------------------------------------------------------------------------------------------------------------------------------------------------------------------------------------------------------------------------------------------------------------------------------------------------------------------------------------------------------------------------------------------------------------------------------|--------------------------------------------------------------------------------------------------------------------------------------------------------------------------------------------------------------------------------------------------------------------------------------------------------------------------------------------------------------------------------------------------------------------------------------------------------------------------------------------------------------------------------------------------------------------------------------------------------------------------------------------------------------------------------------------------------------------------------------------------------------------------------------------------------------------|
| Diabetes, urogenital, blood, and endocrine diseases | 2     | 218-219, 219.1-219.9, 236.0, 240-243.9, 244.0-244.1, 244.3-244.8, 245-246.9, 250-259.9, 270-273.9, 275-276, 277-277.2, 277.4-277.9, 278.0-278.8, 282-284.9, 286-286.5, 286.7-289.7, 349.0-349.1, 357.2, 357.6, 403-404.93, 518.7, 519.0-519.09, 536.4-536.49, 539-539.9, 551.2-551.29, 552.2-552.29, 564.2-564.4, 569.6-569.69, 579.3, 580-583.9, 585-585.9, 588-590.9, 592-593.89, 594-599.69, 599.8-599.89, 601-602.9, 604-604.99, 608.2-608.24, 617-618.9, 620-620.9, 621.4-621.9, 622.3-622.7, 629-629.81, 775.0-775.1, 775.3, 779.4-779.5, 780.62-780.63, 788.0, 790.2-790.22 | D25-D26, D26.1-D26.9, D28.2, D52.1, D55-D58.9, D59.0-D59.3, D59.5-D59.6, D60-D61.9, D63.1, D64.0, D64.4, D66-D67, D68.0-D69.8, D70-D75.89, D76-D78.89, D86.8, D86.82-D86.84, D86.86-D86.87, D89-D89.3, E03-E07.1, E09-E14.9, E15.0, E16.0-E16.9, E20-E34.8, E36-E36.8, E65-E68, E70-E85.29, E87.71, E88-E89.9, G21.1-G21.19, G24.0-G24.09, G25.1, G25.4, G25.6-G25.79, G72.0, G93.7, G97-G97.9, I12-I13.9, I95.2-I95.3, I97-I97.9, I98.9, J70.2-J70.5, J95-J95.9, K43-K43.9, K62.7, K91-K91.9, K94-K95.89, M87.1-M87.19, N00-N08.8, N10-N12.9, N14-N16.8, N18-N18.9, N20-N23.0, N25-N32.0, N32.3-N32.4, N34-N34.3, N36-N36.9, N39-N39.2, N41-N41.9, N44-N44.04, N45-N45.9, N49-N49.9, N65-N65.1, N72-N72.0, N75-N77.8, N80-N81.9, N83-N83.9, N99-N99.9, P70.0-P70.2, P96.2, P96.5, R50.2, R50.82-R50.83, R73-R73.9 |
| Diabetes mellitus                                   | 3-4   | 250-250.39, 250.5-250.99, 357.2, 775.0-775.1, 790.2-790.22                                                                                                                                                                                                                                                                                                                                                                                                                                                                                                                         | E10-E10.11, E10.3-E11.1, E11.3-E12.1, E12.3-E13.11, E13.3-E14.1, E14.3-E14.9, P70.0-P70.2, R73-R73.9                                                                                                                                                                                                                                                                                                                                                                                                                                                                                                                                                                                                                                                                                                               |
| Acute glomerulonephritis                            | 3-4   | 580-580.9                                                                                                                                                                                                                                                                                                                                                                                                                                                                                                                                                                          | N00-N01.9                                                                                                                                                                                                                                                                                                                                                                                                                                                                                                                                                                                                                                                                                                                                                                                                          |
| Chronic kidney disease                              | 3     | 250.4-250.49, 403-404.93, 581-583.9, 585-585.9, 589-589.9                                                                                                                                                                                                                                                                                                                                                                                                                                                                                                                          | D63.1, E10.2-E10.29, E11.2-E11.29, E12.2, E13.2-E13.29, E14.2, I12-I13.9, N02-N08.8, N15.0, N18-N18.9                                                                                                                                                                                                                                                                                                                                                                                                                                                                                                                                                                                                                                                                                                              |
| Chronic kidney disease due to diabetes mellitus     | 4     | 250.4-250.49                                                                                                                                                                                                                                                                                                                                                                                                                                                                                                                                                                       | E10.2-E10.29, E11.2-E11.29, E12.2, E13.2-E13.29, E14.2                                                                                                                                                                                                                                                                                                                                                                                                                                                                                                                                                                                                                                                                                                                                                             |
| Chronic kidney disease due to hypertension          | 4     | 403-404.93                                                                                                                                                                                                                                                                                                                                                                                                                                                                                                                                                                         | I12-I13.9                                                                                                                                                                                                                                                                                                                                                                                                                                                                                                                                                                                                                                                                                                                                                                                                          |
| Chronic kidney disease due to glomerulonephritis    | 4     | 581-583.9                                                                                                                                                                                                                                                                                                                                                                                                                                                                                                                                                                          | N03-N06.9                                                                                                                                                                                                                                                                                                                                                                                                                                                                                                                                                                                                                                                                                                                                                                                                          |
| Chronic kidney disease due to other causes          | 4     | 589-589.9                                                                                                                                                                                                                                                                                                                                                                                                                                                                                                                                                                          | N02-N02.9, N07-N08.8, N15.0                                                                                                                                                                                                                                                                                                                                                                                                                                                                                                                                                                                                                                                                                                                                                                                        |
| Urinary diseases and male infertility               | 3     | 588-588.9, 590-590.9, 592-593.89, 594-596.81, 596.89-598.1, 598.8-599.69, 599.8-599.89, 601-602.9, 604-604.99, 608.2-608.24, 788.0                                                                                                                                                                                                                                                                                                                                                                                                                                                 | N10-N12.9, N15, N15.1-N16.8, N20-N23.0, N25-N32.0, N32.3-N32.4, N34-N34.3, N36-N36.9, N39-N39.2, N41-N41.9, N44-N44.04, N45-N45.9, N49-N49.9                                                                                                                                                                                                                                                                                                                                                                                                                                                                                                                                                                                                                                                                       |
| Interstitial nephritis and urinary tract infections | 4     | 590-590.9, 595-595.9, 597-597.9, 599.0                                                                                                                                                                                                                                                                                                                                                                                                                                                                                                                                             | N10-N12.9, N15, N15.1-N16.8, N30-N30.91, N34-N34.3, N39.0-N39.2                                                                                                                                                                                                                                                                                                                                                                                                                                                                                                                                                                                                                                                                                                                                                    |
| Urolithiasis                                        | 4     | 592-592.9, 594-594.9, 788.0                                                                                                                                                                                                                                                                                                                                                                                                                                                                                                                                                        | N20-N23.0                                                                                                                                                                                                                                                                                                                                                                                                                                                                                                                                                                                                                                                                                                                                                                                                          |
| Other urinary diseases                              | 4     | 588-588.9, 593-593.89, 596-596.81, 596.89-596.9, 598-598.1, 598.8-599, 599.1-599.69, 599.8-599.89, 601-602.9, 604-604.99, 608.2-608.24                                                                                                                                                                                                                                                                                                                                                                                                                                             | N25-N29.8, N31-N32.0, N32.3-N32.4, N36-N36.9, N39, N41-N41.9, N44-N44.04, N45-N45.9, N49-N49.9                                                                                                                                                                                                                                                                                                                                                                                                                                                                                                                                                                                                                                                                                                                     |
| Gynecological diseases                              | 3     | 218-219, 219.1-219.9, 236.0, 256.4, 617-618.9, 620-620.9, 621.4-621.9, 622.3-622.7, 629-629.81                                                                                                                                                                                                                                                                                                                                                                                                                                                                                     | D25-D26, D26.1-D26.9, D28.2, E28.2, N72-N72.0, N75-N77.8, N80-N81.9, N83-N83.9                                                                                                                                                                                                                                                                                                                                                                                                                                                                                                                                                                                                                                                                                                                                     |
| Uterine fibroids                                    | 4     | 218-219, 219.1-219.9, 236.0                                                                                                                                                                                                                                                                                                                                                                                                                                                                                                                                                        | D25-D26, D26.1-D26.9, D28.2                                                                                                                                                                                                                                                                                                                                                                                                                                                                                                                                                                                                                                                                                                                                                                                        |
| Polycystic ovarian syndrome                         | 4     | 256.4                                                                                                                                                                                                                                                                                                                                                                                                                                                                                                                                                                              | E28.2                                                                                                                                                                                                                                                                                                                                                                                                                                                                                                                                                                                                                                                                                                                                                                                                              |
| Endometriosis                                       | 4     | 617-617.9                                                                                                                                                                                                                                                                                                                                                                                                                                                                                                                                                                          | N80-N80.9                                                                                                                                                                                                                                                                                                                                                                                                                                                                                                                                                                                                                                                                                                                                                                                                          |
| Genital prolapse                                    | 4     | 618-618.9                                                                                                                                                                                                                                                                                                                                                                                                                                                                                                                                                                          | N81-N81.9                                                                                                                                                                                                                                                                                                                                                                                                                                                                                                                                                                                                                                                                                                                                                                                                          |
| Other gynecological diseases                        | 4     | 620-620.9, 621.4-621.9, 622.3-622.7, 629-629.81                                                                                                                                                                                                                                                                                                                                                                                                                                                                                                                                    | N72-N72.0, N75-N77.8, N83-N83.9                                                                                                                                                                                                                                                                                                                                                                                                                                                                                                                                                                                                                                                                                                                                                                                    |
| Hemoglobinopathies and hemolytic anemias            | 3     | 282-284.9                                                                                                                                                                                                                                                                                                                                                                                                                                                                                                                                                                          | D55-D58.9, D59.1, D59.3, D59.5, D60-D61.9, D64.0, D64.4                                                                                                                                                                                                                                                                                                                                                                                                                                                                                                                                                                                                                                                                                                                                                            |
| Thalassemias                                        | 4     | 282.4-282.49                                                                                                                                                                                                                                                                                                                                                                                                                                                                                                                                                                       | D56-D56.9                                                                                                                                                                                                                                                                                                                                                                                                                                                                                                                                                                                                                                                                                                                                                                                                          |
| Sickle cell disorders                               | 4     | 282.6-282.68                                                                                                                                                                                                                                                                                                                                                                                                                                                                                                                                                                       | D57-D57.219, D57.4-D57.819                                                                                                                                                                                                                                                                                                                                                                                                                                                                                                                                                                                                                                                                                                                                                                                         |
| G6PD deficiency                                     | 4     | 282.2-282.3                                                                                                                                                                                                                                                                                                                                                                                                                                                                                                                                                                        | D55-D55.2                                                                                                                                                                                                                                                                                                                                                                                                                                                                                                                                                                                                                                                                                                                                                                                                          |
| Other hemoglobinopathies and hemolytic anemias      | 4     | 282-282.1, 282.69-284.9                                                                                                                                                                                                                                                                                                                                                                                                                                                                                                                                                            | D55.3-D55.9, D58-D58.9, D59.1, D59.3, D59.5, D60-D61.9, D64.0, D64.4                                                                                                                                                                                                                                                                                                                                                                                                                                                                                                                                                                                                                                                                                                                                               |

eTable 2: GBD cause list and associated ICD9 and ICD10 codes (continued).

| Cause                                             | Level | ICD9                                                                                                                                                                                                                                                                                                                                              | ICD10                                                                                                                                                                                                                                                                                                                                                                                                                                                                                                             |
|---------------------------------------------------|-------|---------------------------------------------------------------------------------------------------------------------------------------------------------------------------------------------------------------------------------------------------------------------------------------------------------------------------------------------------|-------------------------------------------------------------------------------------------------------------------------------------------------------------------------------------------------------------------------------------------------------------------------------------------------------------------------------------------------------------------------------------------------------------------------------------------------------------------------------------------------------------------|
| Endocrine, metabolic, blood, and immune disorders | 3-4   | 240-243.9, 244.0-244.1, 244.3-244.8, 245-246.9, 251-256.39, 256.8-259.9, 270-273.9, 275-276, 277-277.2, 277.4-277.9, 278.0-278.8, 286-286.5, 286.7-289.7, 349.0-349.1, 357.6, 518.7, 519.0-519.09, 536.4-536.49, 539-539.9, 551.2-551.29, 552.2-552.29, 564.2-564.4, 569.6-569.69, 579.3, 596.82-596.83, 598.2, 775.3, 779.4-779.5, 780.62-780.63 | D52.1, D59.0, D59.2, D59.6, D66-D67, D68.0-D69.8, D70-D75.89, D76-D78.89, D86.8, D86.82-D86.84, D86.86-D86.87, D89-D89.3, E03-E07.1, E09-E09.9, E15.0, E16.0-E16.9, E20-E28.1, E28.3-E34.8, E36-E36.8, E65-E68, E70-E85.29, E87.71, E88-E89.9, G21.1-G21.19, G24.0-G24.09, G25.1, G25.4, G25.6-G25.79, G72.0, G93.7, G97-G97.9, I95.2-I95.3, I97-I97.9, I98.9, J70.2-J70.5, J95-J95.9, K43-K43.9, K62.7, K91-K91.9, K94-K95.89, M87.1-M87.19, N14-N14.4, N65-N65.1, N99-N99.9, P96.2, P96.5, R50.2, R50.82-R50.83 |
| Musculoskeletal disorders                         | 2     | 416.1, 437.4, 446-446.9, 695.4-695.59, 710-711.99, 714-714.33, 714.8-714.9, 730.1-730.19, 732-732.9, 733.0-733.19                                                                                                                                                                                                                                 | I27.1, I67.7, L93-L93.2, M00-M03.0, M03.2-M03.6, M05-M09.0, M09.2-M09.8, M30-M32.9, M34-M36.8, M40-M43.19, M65-M65.08, M71.0-M71.19, M80-M82.8, M86.3-M86.49, M87-M87.09, M88-M89.09, M89.5-M89.59, M89.7-M89.9                                                                                                                                                                                                                                                                                                   |
| Rheumatoid arthritis                              | 3-4   | 714-714.33, 714.8-714.9                                                                                                                                                                                                                                                                                                                           | M05-M06.9, M08.0-M08.89                                                                                                                                                                                                                                                                                                                                                                                                                                                                                           |
| Other musculoskeletal disorders                   | 3-4   | 416.1, 437.4, 446-446.9, 695.4-695.59, 710-711.99, 730.1-730.19, 732-732.9, 733.0-733.19                                                                                                                                                                                                                                                          | I27.1, I67.7, L93-L93.2, M00-M03.0, M03.2-M03.6, M07-M08, M08.9-M09.0, M09.2-M09.8, M30-M32.9, M34-M36.8, M40-M43.19, M65-M65.08, M71.0-M71.19, M80-M82.8, M86.3-M86.49, M87-M87.09, M88-M89.09, M89.5-M89.59, M89.7-M89.9                                                                                                                                                                                                                                                                                        |
| Other non-communicable diseases                   | 2     | 035-035.9, 102-103.9, 133-133.6, 376.0-376.1, 680-689, 694-695.3, 707-707.9, 740-749.04, 749.2-758.9, 759.0-759.89, 798-798.0                                                                                                                                                                                                                     | A46-A46.0, A66-A67.9, B86, D86.3, H05.0-H05.119, L00-L05.92, L08-L08.9, L10-L14.0, L51-L51.9, L88-L89.95, L97-L98.499, P96.0, Q00-Q07.9, Q10.4-Q18.9, Q20-Q28.9, Q30-Q36, Q37-Q45.9, Q50-Q86, Q86.1-Q87.89, Q89-Q89.8, Q90-Q93.9, Q95-Q99.8, R95                                                                                                                                                                                                                                                                  |
| Congenital anomalies                              | 3     | 740-749.04, 749.2-758.9, 759.0-759.89                                                                                                                                                                                                                                                                                                             | P96.0, Q00-Q07.9, Q10.4-Q18.9, Q20-Q28.9, Q30-Q36, Q37-Q45.9, Q50-Q86, Q86.1-Q87.89, Q89-Q89.8, Q90-Q93.9, Q95-Q99.8                                                                                                                                                                                                                                                                                                                                                                                              |
| Neural tube defects                               | 4     | 740-741.93, 742.0                                                                                                                                                                                                                                                                                                                                 | Q00-Q01.9, Q05-Q05.9                                                                                                                                                                                                                                                                                                                                                                                                                                                                                              |
| Congenital heart anomalies                        | 4     | 745-747.9                                                                                                                                                                                                                                                                                                                                         | Q20-Q28.9                                                                                                                                                                                                                                                                                                                                                                                                                                                                                                         |
| Cleft lip and cleft palate                        | 4     | 749-749.04, 749.2-749.25                                                                                                                                                                                                                                                                                                                          | Q35-Q36, Q37-Q37.9                                                                                                                                                                                                                                                                                                                                                                                                                                                                                                |
| Down syndrome                                     | 4     | 758                                                                                                                                                                                                                                                                                                                                               | Q90-Q90.9                                                                                                                                                                                                                                                                                                                                                                                                                                                                                                         |
| Other chromosomal abnormalities                   | 4     | 758, 758.1-758.6, 758.8-758.9                                                                                                                                                                                                                                                                                                                     | Q91-Q93.9, Q95-Q95.9, Q97-Q97.9, Q99-Q99.8                                                                                                                                                                                                                                                                                                                                                                                                                                                                        |
| Other congenital anomalies                        | 4     | 742, 742.1-744.9, 748-748.9, 749.6-757.9, 759.0-759.89                                                                                                                                                                                                                                                                                            | P96.0, Q02-Q04.9, Q06-Q07.9, Q10.4-Q18.9, Q30-Q34.9, Q38-Q45.9, Q50-Q86, Q86.1-Q87.89, Q89-Q89.8                                                                                                                                                                                                                                                                                                                                                                                                                  |
| Skin and subcutaneous diseases                    | 3     | 035-035.9, 102-103.9, 133-133.6, 680-689, 694-695.3, 707-707.9                                                                                                                                                                                                                                                                                    | A46-A46.0, A66-A67.9, B86, D86.3, L00-L05.92, L08-L08.9, L10-L14.0, L51-L51.9, L88-L89.95, L97-L98.499                                                                                                                                                                                                                                                                                                                                                                                                            |
| Cellulitis                                        | 4     | 681-682.9                                                                                                                                                                                                                                                                                                                                         | L03-L03.91                                                                                                                                                                                                                                                                                                                                                                                                                                                                                                        |
| Pyoderma                                          | 4     | 035-035.9, 102-103.9, 680-680.9, 683-689                                                                                                                                                                                                                                                                                                          | A46-A46.0, A66-A67.9, L00-L02.93, L04-L05.92, L08-L08.9, L88, L97-L98.499                                                                                                                                                                                                                                                                                                                                                                                                                                         |
| Decubitus ulcer                                   | 4     | 707-707.9                                                                                                                                                                                                                                                                                                                                         | L89-L89.95                                                                                                                                                                                                                                                                                                                                                                                                                                                                                                        |
| Other skin and subcutaneous diseases              | 4     | 694-695.3                                                                                                                                                                                                                                                                                                                                         | D86.3, L10-L14.0, L51-L51.9                                                                                                                                                                                                                                                                                                                                                                                                                                                                                       |
| Sudden infant death syndrome                      | 3-4   | 798-798.0                                                                                                                                                                                                                                                                                                                                         | R95                                                                                                                                                                                                                                                                                                                                                                                                                                                                                                               |

eTable 2: GBD cause list and associated ICD9 and ICD10 codes (continued).

| Cause                       | Level | ICD9                                                                                                                                                                                                                                                                                                                                                                                                                                                                                                                                                                                              | ICD10                                                                                                                                                                                                                                                            |
|-----------------------------|-------|---------------------------------------------------------------------------------------------------------------------------------------------------------------------------------------------------------------------------------------------------------------------------------------------------------------------------------------------------------------------------------------------------------------------------------------------------------------------------------------------------------------------------------------------------------------------------------------------------|------------------------------------------------------------------------------------------------------------------------------------------------------------------------------------------------------------------------------------------------------------------|
| Injuries                    | 1     | E800-E800.3, E801-E801.3, E802-E802.3, E803-E803.3, E804-E804.3, E805-E805.3, E806-E806.3, E807-E807.3, E810.0-E810.7, E811.0-E811.7, E812.0-E812.7, E813.0-E813.7, E814.0-E814.7, E815.0-E815.7, E816.0-E816.7, E817.0-E817.7, E818.0-E818.7, E819.0-E819.7, E820.0-E820.7, E821.0-E821.7, E822.0-E822.7, E823.0-E823.7, E824.0-E824.7, E825.0-E825.7, E826.0-E826.4, E827.0-E827.4, E828.0-E828.4, E829.0-E829.4, E830-E838.9, E840-E849.9, E850.3-E850.89, E854.8, E856-E857.09, E860.2-E869.99, E870-E876.9, E878-E879.9, E880-E886.99, E888-E928.89, E929.1-E929.5, E930-E979.9, E990-E999.1 | V00-V86.99, V87.2-V87.3, V88.2-V88.3, V90-V98.8, W00-W46.2, W49-W62.9, W64-W70.9, W73-W75.9, W77-W81.9, W83-W94.9, W97.9, W99-X06.9, X08-X39.9, X46-X47, X47.1-X47.8, X48-X48.9, X50-X54.9, X57-X58.9, X60-Y08.9, Y35-Y84.9, Y87.0-Y87.1, Y88-Y88.3, Y89.0-Y89.1 |
| Transport injuries          | 2     | E800-E800.3, E801-E801.3, E802-E802.3, E803-E803.3, E804-E804.3, E805-E805.3, E806-E806.3, E807-E807.3, E810.0-E810.7, E811.0-E811.7, E812.0-E812.7, E813.0-E813.7, E814.0-E814.7, E815.0-E815.7, E816.0-E816.7, E817.0-E817.7, E818.0-E818.7, E819.0-E819.7, E820.0-E820.7, E821.0-E821.7, E822.0-E822.7, E823.0-E823.7, E824.0-E824.7, E825.0-E825.7, E826.0-E826.4, E827.0-E827.4, E828.0-E828.4, E829.0-E829.4, E830-E838.9, E840-E849.9, E929.1                                                                                                                                              | V00-V86.99, V87.2-V87.3, V88.2-V88.3, V90-V98.8                                                                                                                                                                                                                  |
| Road injuries               | 3     | E800.3, E801.3, E802.3, E803.3, E804.3, E805.3, E806.3, E807.3, E810.0-E810.6, E811.0-E811.7, E812.0-E812.7, E813.0-E813.7, E814.0-E814.7, E815.0-E815.7, E816.0-E816.7, E817.0-E817.7, E818.0-E818.7, E819.0-E819.7, E820.0-E820.6, E821.0-E821.6, E822.0-E822.7, E823.0-E823.7, E824.0-E824.7, E825.0-E825.7, E826.0-E826.1, E826.3-E826.4, E827.0, E827.3-E827.4, E828.0, E828.4, E829.0-E829.4                                                                                                                                                                                                | V01-V04.99, V06-V80.929, V82-V82.9, V87.2-V87.3                                                                                                                                                                                                                  |
| Pedestrian road injuries    | 4     | E811.7, E812.7, E813.7, E814.7, E815.7, E816.7, E817.7, E818.7, E819.7, E822.7, E823.7, E824.7, E825.7, E826.0, E827.0, E828.0, E829.0                                                                                                                                                                                                                                                                                                                                                                                                                                                            | V01-V04.99, V06-V09.9                                                                                                                                                                                                                                            |
| Cyclist road injuries       | 4     | E800.3, E801.3, E802.3, E803.3, E804.3, E805.3, E806.3, E807.3, E810.6, E811.6, E812.6, E813.6, E814.6, E815.6, E816.6, E817.6, E818.6, E819.6, E820.6, E821.6, E822.6, E823.6, E824.6, E825.6, E826.1                                                                                                                                                                                                                                                                                                                                                                                            | V10-V19.9                                                                                                                                                                                                                                                        |
| Motorcyclist road injuries  | 4     | E810.2-E810.3, E811.2-E811.3, E812.2-E812.3, E813.2-E813.3, E814.2-E814.3, E815.2-E815.3, E816.2-E816.3, E817.2-E817.3, E818.2-E818.3, E819.2-E819.3, E820.2-E820.3, E821.2-E821.3, E822.2-E822.3, E823.2-E823.3, E824.2-E824.3, E825.2-E825.3                                                                                                                                                                                                                                                                                                                                                    | V20-V29.9                                                                                                                                                                                                                                                        |
| Motor vehicle road injuries | 4     | E810.0-E810.1, E811.0-E811.1, E812.0-E812.1, E813.0-E813.1, E814.0-E814.1, E815.0-E815.1, E816.0-E816.1, E817.0-E817.1, E818.0-E818.1, E819.0-E819.1, E820.0-E820.1, E821.0-E821.1, E822.0-E822.1, E823.0-E823.1, E824.0-E824.1, E825.0-E825.1                                                                                                                                                                                                                                                                                                                                                    | V30-V79.9, V87.2-V87.3                                                                                                                                                                                                                                           |

**eTable 2: GBD cause list and associated ICD9 and ICD10 codes (continued).**

| Cause                                           | Level | ICD9                                                                                                                                                                                                                                                                                         | ICD10                                                                                                                                                                                   |
|-------------------------------------------------|-------|----------------------------------------------------------------------------------------------------------------------------------------------------------------------------------------------------------------------------------------------------------------------------------------------|-----------------------------------------------------------------------------------------------------------------------------------------------------------------------------------------|
| Other road injuries                             | 4     | E810.4-E810.5, E811.4-E811.5, E812.4-E812.5, E813.4-E813.5, E814.4-E814.5, E815.4-E815.5, E816.4-E816.5, E817.4-E817.5, E818.4-E818.5, E819.4-E819.5, E820.4-E820.5, E821.4-E821.5, E822.4-E822.5, E823.4-E823.5, E824.4-E824.5, E825.4-E825.5, E826.3-E826.4, E827.3-E827.4, E828.4, E829.4 | V80-V80.929, V82-V82.9                                                                                                                                                                  |
| Other transport injuries                        | 3-4   | E800-E800.2, E801-E801.2, E802-E802.2, E803-E803.2, E804-E804.2, E805-E805.2, E806-E806.2, E807-E807.2, E810.7, E820.7, E821.7, E826.2, E827.2, E828.2, E830-E838.9, E840-E849.9, E929.1                                                                                                     | V00-V00.898, V05-V05.99, V81-V81.9, V83-V86.99, V88.2-V88.3, V90-V98.8                                                                                                                  |
| Unintentional injuries                          | 2     | E850.3-E850.89, E854.8, E856-E857.09, E860.2-E869.99, E870-E876.9, E878-E879.9, E880-E886.99, E888-E906.99, E910-E928.89, E929.2-E929.5, E930-E949.9                                                                                                                                         | W00-W46.2, W49-W62.9, W64-W70.9, W73-W75.9, W77-W81.9, W83-W94.9, W97.9, W99-X06.9, X08-X32.9, X39-X39.9, X46-X47, X47.1-X47.8, X48-X48.9, X50-X54.9, X57-X58.9, Y38.9-Y84.9, Y88-Y88.3 |
| Falls                                           | 3-4   | E880-E886.99, E888-E888.9, E929.3                                                                                                                                                                                                                                                            | W00-W19.9                                                                                                                                                                               |
| Drowning                                        | 3-4   | E910-E910.99                                                                                                                                                                                                                                                                                 | W65-W70.9, W73-W74.9                                                                                                                                                                    |
| Fire, heat, and hot substances                  | 3-4   | E890-E899.09, E924-E924.99, E929.4                                                                                                                                                                                                                                                           | X00-X06.9, X08-X19.9                                                                                                                                                                    |
| Poisonings                                      | 3-4   | E850.3-E850.89, E854.8, E856-E857.09, E860.2-E869.99, E929.2                                                                                                                                                                                                                                 | X46-X47, X47.1-X47.8, X48-X48.9                                                                                                                                                         |
| Exposure to mechanical forces                   | 3     | E913-E913.19, E916-E922.99, E928.1-E928.7                                                                                                                                                                                                                                                    | W20-W38.9, W40-W43.9, W45.0-W45.2, W46-W46.2, W49-W52, W75-W75.9                                                                                                                        |
| Unintentional firearm injuries                  | 4     | E922-E922.99, E928.7                                                                                                                                                                                                                                                                         | W32-W34.9                                                                                                                                                                               |
| Unintentional suffocation                       | 4     | E913-E913.19                                                                                                                                                                                                                                                                                 | W75-W75.9                                                                                                                                                                               |
| Other exposure to mechanical forces             | 4     | E916-E921.99, E928.1-E928.6                                                                                                                                                                                                                                                                  | W20-W31.9, W35-W38.9, W40-W43.9, W45.0-W45.2, W46-W46.2, W49-W52                                                                                                                        |
| Adverse effects of medical treatment            | 3-4   | E870-E876.9, E878-E879.9, E930-E949.9                                                                                                                                                                                                                                                        | Y38.9-Y84.9, Y88-Y88.3                                                                                                                                                                  |
| Animal contact                                  | 3     | E905-E906.99                                                                                                                                                                                                                                                                                 | W52.0-W62.9, W64-W64.9, X20-X29.9                                                                                                                                                       |
| Venomous animal contact                         | 4     | E905-E905.99                                                                                                                                                                                                                                                                                 | X20-X29.9                                                                                                                                                                               |
| Non-venomous animal contact                     | 4     | E906-E906.99                                                                                                                                                                                                                                                                                 | W52.0-W62.9, W64-W64.9                                                                                                                                                                  |
| Foreign body                                    | 3     | E911-E912.09, E913.8-E915.09                                                                                                                                                                                                                                                                 | W44-W45, W45.3-W45.9, W78-W80.9, W83-W84.9                                                                                                                                              |
| Pulmonary aspiration and foreign body in airway | 4     | E911-E912.09, E913.8-E913.99                                                                                                                                                                                                                                                                 | W78-W80.9, W83-W84.9                                                                                                                                                                    |
| Foreign body in other body part                 | 4     | E914-E915.09                                                                                                                                                                                                                                                                                 | W44-W45, W45.3-W45.9                                                                                                                                                                    |
| Environmental heat and cold exposure            | 3-4   | E900-E902.99, E926-E926.99, E929.5                                                                                                                                                                                                                                                           | W88-W94.9, W97.9, W99-W99.9, X30-X32.9, X39-X39.9                                                                                                                                       |
| Other unintentional injuries                    | 3-4   | E903-E904.99, E913.2-E913.39, E923-E923.99, E925-E925.99, E927-E928.09, E928.8-E928.89                                                                                                                                                                                                       | W39-W39.9, W77-W77.9, W81-W81.9, W85-W87.9, X50-X54.9, X57-X58.9                                                                                                                        |
| Self-harm and interpersonal violence            | 2     | E950-E969                                                                                                                                                                                                                                                                                    | X60-Y08.9, Y87.0-Y87.1                                                                                                                                                                  |
| Self-harm                                       | 3-4   | E950-E959                                                                                                                                                                                                                                                                                    | X60-X84.9, Y87.0                                                                                                                                                                        |
| Interpersonal violence                          | 3     | E960-E969                                                                                                                                                                                                                                                                                    | X85-Y08.9, Y87.1                                                                                                                                                                        |
| Assault by firearm                              | 4     | E965-E965.4                                                                                                                                                                                                                                                                                  | X93-X94.0, X94.3-X94.7, X94.9-X95.9, X96.5                                                                                                                                              |
| Assault by sharp object                         | 4     | E966                                                                                                                                                                                                                                                                                         | X99-X99.9                                                                                                                                                                               |
| Assault by other means                          | 4     | E960-E964, E965.5-E965.9, E967-E969                                                                                                                                                                                                                                                          | X85-X92.9, X94.1-X94.2, X94.8, X96-X96.4, X96.6-X98.9, Y00-Y08.9, Y87.1                                                                                                                 |
| Forces of nature, war, and legal intervention   | 2     | E907-E909.9, E970-E979.9, E990-E999.1                                                                                                                                                                                                                                                        | X33-X38.9, Y35-Y38.893, Y89.0-Y89.1                                                                                                                                                     |
| Exposure to forces of nature                    | 3-4   | E907-E909.9                                                                                                                                                                                                                                                                                  | X33-X38.9                                                                                                                                                                               |
| Collective violence and legal intervention      | 3-4   | E970-E979.9, E990-E999.1                                                                                                                                                                                                                                                                     | Y35-Y38.893, Y89.0-Y89.1                                                                                                                                                                |



eTable 2: GBD cause list and associated ICD9 and ICD10 codes (continued).

| Cause        | Level | ICD9                                                                                                                                                                                                                                                                                                                                                                                                                                                                                                                                                                                                                                                                                                                                                                                                                                                                                                                                                                                                                                                                                                                                                                                                                                                                                                                                                                                                                                                                                                                                                                                                                                                                                                             | ICD10                                                                                                                                                                                                                                                                                                                                                                                                                                                                                                                                                                                                                                                                                                                                                                                                                                                                                                                                                                                                                                                                                                                                                                                                                                                                                                                                                                                                                                                                                                                                                         |
|--------------|-------|------------------------------------------------------------------------------------------------------------------------------------------------------------------------------------------------------------------------------------------------------------------------------------------------------------------------------------------------------------------------------------------------------------------------------------------------------------------------------------------------------------------------------------------------------------------------------------------------------------------------------------------------------------------------------------------------------------------------------------------------------------------------------------------------------------------------------------------------------------------------------------------------------------------------------------------------------------------------------------------------------------------------------------------------------------------------------------------------------------------------------------------------------------------------------------------------------------------------------------------------------------------------------------------------------------------------------------------------------------------------------------------------------------------------------------------------------------------------------------------------------------------------------------------------------------------------------------------------------------------------------------------------------------------------------------------------------------------|---------------------------------------------------------------------------------------------------------------------------------------------------------------------------------------------------------------------------------------------------------------------------------------------------------------------------------------------------------------------------------------------------------------------------------------------------------------------------------------------------------------------------------------------------------------------------------------------------------------------------------------------------------------------------------------------------------------------------------------------------------------------------------------------------------------------------------------------------------------------------------------------------------------------------------------------------------------------------------------------------------------------------------------------------------------------------------------------------------------------------------------------------------------------------------------------------------------------------------------------------------------------------------------------------------------------------------------------------------------------------------------------------------------------------------------------------------------------------------------------------------------------------------------------------------------|
| Garbage Code |       | 000-000.9, 002, 031-031.9, 038-038.9, 039.6, 040.0, 041.1-041.9, 067-069, 076-078.3, 078.8-078.9, 079.8-079.99, 084, 084.6, 085, 085.1-085.9, 089-089.9, 105-119, 125-125.3, 126-126.9, 127.2-127.9, 130-132.9, 133.8-134.9, 136.3-136.5, 136.8-136.9, 139.1-139.9, 149-149.9, 159-159.9, 165-169, 176-179.9, 183.9-184, 184.5, 184.9, 187, 187.9, 189, 189.9, 194.9-199.9, 209, 209.2-209.20, 209.29-209.30, 209.6-209.60, 209.62, 209.69-210, 211, 211.9-212, 212.9, 214-216.9, 221, 221.9-222, 222.9-223, 223.9, 229, 229.1, 229.9-230.0, 230.9-231, 231.8-231.9, 233, 233.3-233.30, 233.39, 233.6, 233.9-234, 234.9-235, 235.1-235.3, 235.5, 235.9-236, 236.3, 236.6, 236.9-236.90, 237.4, 238, 238.6-239.1, 239.5, 239.7-239.9, 244, 244.9, 247-249.91, 264-264.9, 274-274.9, 276.0-276.9, 277.3-277.39, 278, 279-280.0, 280.9-281, 285-285.9, 286.6, 289.8-289.9, 293-294.0, 296-302.9, 304, 304.9-304.93, 306-307.0, 307.2-307.50, 307.52-307.53, 307.59-320, 320.9, 324-327.19, 328-329, 331.3-331.4, 338-339.89, 342-344.9, 346-348.9, 349.81-353.5, 354-355.9, 357, 357.8-357.9, 360-376, 376.10-380.9, 384-389.9, 399-401.9, 405-409.4, 415-416.0, 416.2-416.9, 418-419.9, 423.0, 426-426.9, 427.4-427.5, 427.9-429, 429.2-429.9, 436-437, 437.3, 437.9-440.9, 444-445.89, 458-458.9, 459.0, 459.5-460.9, 462-464, 464.00, 464.1-464.10, 464.20, 464.3-464.30, 464.5-464.51, 465-465.9, 482.9-483, 484, 484.8-486.9, 505-505.9, 507-507.9, 510-514.9, 515.0-515.9, 518-518.53, 518.8-518.89, 519, 519.8-529.9, 536.2-536.3, 536.8-536.9, 537.7, 537.89-537.9, 544-549, 553.8-553.9, 559-559.0, 560.4-560.7, 561, 562.2-563, 564.8-564.9, 567-569, 569.49, 569.79-569.83, 569.86-570.9, 572-572.2, 573 | A01, A14.9, A29, A31-A31.9, A40-A45.9, A47-A48.0, A48.3, A48.8-A49.02, A49.2-A49.9, A59-A59.9, A61-A62, A64-A64.0, A71-A73, A74.0, A76, A97, A99-A99.0, B07-B09, B11-B14, B28-B29, B30-B32.4, B34-B46.9, B49-B49.9, B54-B55, B55.1-B55.9, B58-B59.9, B61-B62, B64, B68-B68.9, B73-B74.2, B76-B76.9, B78-B82.9, B83.9-B85.4, B87-B89, B93-B94.0, B94.8-B94.9, B95.6-B99.9, C14-C14.9, C26-C29, C35-C36, C39-C39.9, C42, C46-C46.9, C55-C55.9, C57.9, C59-C6, C63.9, C68, C68.9, C75.9-C80.9, C87, C97-D00.0, D01, D01.4-D02, D02.4-D02.9, D07, D07.3-D07.39, D07.6-D09, D09.1-D09.19, D09.7, D09.9-D10, D10.9, D13, D13.9-D14, D14.4, D17-D21.9, D28, D28.9-D29, D29.9-D30, D30.9, D36.0, D36.9-D37.0, D37.6-D38, D38.6-D39.0, D39.7, D39.9-D40, D40.9-D41, D41.9, D44, D44.9, D46-D46.9, D47.1, D48, D48.7-D49.1, D49.5, D49.7-D49.8, D49.89-D50.0, D50.9, D54, D59, D59.4, D59.8-D59.9, D62-D63.0, D63.8-D64, D64.1-D64.2, D64.8-D65.9, D68, D69.9, D75.9, D79-D85, D87-D88, D89.8-D99, E07.8-E08.9, E15, E16, E17-E19, E34.9-E35.8, E37-E39, E47-E50.9, E62, E64.1, E69, E85.3-E87.70, E87.79-E87.99, E90-E998, F04-F06.1, F06.3-F07.0, F07.2-F09.9, F17-F17.9, F30-F50, F50.8-G00, G00.9-G02.8, G03.9, G06-G09.9, G15-G19, G27-G29, G32-G34, G38-G39, G42-G44.89, G47-G47.29, G47.4-G60.9, G62-G69, G74-G89.4, G91-G93.6, G93.8-G94.8, G96-G96.9, G98-H05, H05.12-H69.93, H71-H99, I00.0, I03-I04, I10-I10.9, I14-I19, I26-I27.0, I27.2-I27.9, I28.9-I29.9, I31.2-I31.4, I44-I46.9, I49-I51, I51.6-I59, I62, I62.1-I62.9, I64-I64.9, I67, I67.4, I67.8-I68 |

eTable 2: GBD cause list and associated ICD9 and ICD10 codes (continued).

| Cause                    | Level | ICD9                                                                                                                                                                                                                                                                                                                                                                                                                                                                                                                                                                                                                                                                                                                                                                                                                                                                                                                                                                                                                                                         | ICD10                                                                                                                                                                                                                                                                                                                                                                                                                                                                                                                                                                                                                                                                                                                                                                                                                                                                                                                                                                                                                                                                                                                                                                                                                                                                                                                                                                                                                                                                                                                  |
|--------------------------|-------|--------------------------------------------------------------------------------------------------------------------------------------------------------------------------------------------------------------------------------------------------------------------------------------------------------------------------------------------------------------------------------------------------------------------------------------------------------------------------------------------------------------------------------------------------------------------------------------------------------------------------------------------------------------------------------------------------------------------------------------------------------------------------------------------------------------------------------------------------------------------------------------------------------------------------------------------------------------------------------------------------------------------------------------------------------------|------------------------------------------------------------------------------------------------------------------------------------------------------------------------------------------------------------------------------------------------------------------------------------------------------------------------------------------------------------------------------------------------------------------------------------------------------------------------------------------------------------------------------------------------------------------------------------------------------------------------------------------------------------------------------------------------------------------------------------------------------------------------------------------------------------------------------------------------------------------------------------------------------------------------------------------------------------------------------------------------------------------------------------------------------------------------------------------------------------------------------------------------------------------------------------------------------------------------------------------------------------------------------------------------------------------------------------------------------------------------------------------------------------------------------------------------------------------------------------------------------------------------|
| Garbage Code (continued) |       | 573.5, 578-578.9, 584-584.9, 586-587.9, 591-591.9, 593.9, 599.7-599.72, 599.9-600.91, 603-603.9, 605-608.1, 608.3-609, 611-612.1, 615-616.9, 619-619.9, 621-621.35, 622-622.2, 622.8-628.9, 629.89-629.9, 637-637.92, 639-639.9, 690-693.9, 695.8-706.9, 708-709.9, 712-713.8, 714.4, 715-716, 716.1-728.85, 728.87, 728.89-730.09, 730.2-730.39, 730.7-731.9, 733, 733.2-739.9, 749.1-749.14, 759, 759.9, 770.0, 779.9-780.56, 780.58, 780.6-780.61, 780.64-786.02, 786.04-787.04, 787.2-787.9, 787.99-788, 788.1-790.1, 790.29, 790.4-797.9, 798.1-E80, E800.8-E800.9, E801.8-E801.9, E802.8-E802.9, E803.8-E803.9, E804.8-E804.9, E805.8-E805.9, E806.8-E806.9, E807.8-E810, E810.8-E811, E811.8-E812, E812.8-E813, E813.8-E814, E814.8-E815, E815.8-E816, E816.8-E817, E817.8-E818, E818.8-E819, E819.8-E820, E820.8-E821, E821.8-E822, E822.8-E823, E823.8-E824, E824.8-E825, E825.8-E826, E826.8-E827, E827.8-E828, E828.8-E829, E829.8-E83, E839, E85, E855-E855.99, E858-E859, E87, E877, E88, E887-E887.09, E928.9-E929.0, E929.8-E929.9, E980-E989 | I68.8-I69, I69.4-I70.1, I70.8-I70.92, I74-I76, I90, I92-I95.1, I95.8-I96.9, I98.4-I98.8, I99-J00.0, J02, J02.8-J03, J03.8-J04, J04.1-J04.31, J05.1-J05.10, J06-J08, J15.9, J17-J19.6, J22-J29, J48-J59, J64-J64.9, J69-J69.9, J71-J81.9, J83, J85-J90.9, J93-J94.9, J96-K19, K30, K31.9-K34, K39, K47-K49, K53-K54, K63-K63.4, K63.8-K63.9, K65-K66.1, K66.9, K69, K71-K71.2, K71.6, K71.8-K72.01, K75-K75.1, K78-K79, K84, K87-K89, K92-K92.2, K92.9-K93, K93.1-K93.8, K96-K99, L06-L07, L09, L15-L50.9, L52-L87.9, L90-L92.9, L94-L96, L98.5-L99.8, M04, M10-M12.09, M12.2-M29, M37-M39, M43.2-M49, M49.2-M64, M65.1-M71, M71.2-M73, M73.8-M79.9, M83-M86.29, M86.5-M86.9, M87.2-M87.9, M89.1-M89.49, M90-M99.9, N09, N13-N13.9, N17-N17.9, N19-N19.9, N24, N32.1-N32.2, N32.8-N33.8, N35-N35.9, N37-N38, N39.3-N40.9, N42-N43.42, N44.1-N44.8, N46-N48.9, N50-N59, N61-N64.9, N66-N69, N78-N79, N82-N82.9, N84, N84.2-N86, N88-N95.9, N97-N97.9, O08-O08.9, O17-O19, O27, O37-O39, O49-O59, O78-O79, O93-O95.9, P06, P16-P18, P23, P23.5-P23.9, P30-P34.2, P37.3-P37.4, P40-P49, P62-P69, P73, P79, P82, P85-P89, P96.9-P99.9, Q08-Q10.3, Q19, Q29, Q36.0-Q36.9, Q46-Q49, Q88, Q89.9, Q94, Q99.9-R19.6, R19.8-R50.1, R50.8-R50.81, R50.84-R72.9, R74-R78, R78.6-R94.8, R95.0-T71.161, T71.163-U03, U05-U99, V87-V87.1, V87.4-V88.1, V88.4-V89.9, V99-V99.0, W47-W48, W63, W71-W72, W76-W76.9, W82, W95-W97, W98, X07, X40-X44.9, X47.0, X47.9, X49-X49.9, X55-X56, X59-X59.9, Y09-Y34.9, Y85-Y87, Y87.2, Y89, Y89.9 |

**eTable 3: Five-year relative survival, 1973-2013, by age group.\***

| Age                               | Relative 5-year Survival (%) |                     |                     |                     |                     |                     |                     |                     |
|-----------------------------------|------------------------------|---------------------|---------------------|---------------------|---------------------|---------------------|---------------------|---------------------|
|                                   | 1973-1977                    | 1978-1982           | 1983-1987           | 1988-1992           | 1993-1997           | 1998-2002           | 2003-2007           | 2008-2013           |
| <b>Neoplasms</b>                  |                              |                     |                     |                     |                     |                     |                     |                     |
| All                               | 48.2<br>(48.0-48.4)          | 49.4<br>(49.2-49.6) | 52.6<br>(52.4-52.8) | 58.4<br>(58.2-58.6) | 61.5<br>(61.4-61.7) | 64.4<br>(64.3-64.5) | 65.6<br>(65.6-65.7) | 67.0<br>(66.8-67.1) |
| 0-14 years                        | 55.8<br>(54.0-57.6)          | 64.0<br>(62.3-65.7) | 68.6<br>(67.0-70.1) | 74.3<br>(72.9-75.6) | 77.2<br>(76.1-78.3) | 79.1<br>(79.8)      | 82.0<br>(81.4-82.7) | 83.0<br>(82.2-83.8) |
| 15-64 years                       | 54.1<br>(53.8-54.3)          | 55.0<br>(54.8-55.3) | 57.5<br>(57.3-57.8) | 61.3<br>(61.1-61.6) | 66.6<br>(66.4-66.8) | 70.9<br>(70.8-71.0) | 72.5<br>(72.4-72.6) | 73.7<br>(73.6-73.9) |
| ≥65 years                         | 41.8<br>(41.4-42.1)          | 43.8<br>(43.5-44.1) | 48.1<br>(47.8-48.4) | 56.0<br>(55.8-56.3) | 57.1<br>(56.9-57.3) | 58.2<br>(58.0-58.3) | 58.4<br>(58.2-58.5) | 59.4<br>(59.2-59.6) |
| <b>Lip and oral cavity cancer</b> |                              |                     |                     |                     |                     |                     |                     |                     |
| All                               | 61.5<br>(60.1-62.9)          | 61.0<br>(59.7-62.3) | 63.1<br>(61.8-64.4) | 62.2<br>(60.9-63.4) | 63.0<br>(61.9-64.1) | 63.1<br>(62.2-63.9) | 65.0<br>(64.3-65.7) | 66.4<br>(65.5-67.3) |
| 0-14 years                        | 81.3<br>(52.4-93.6)          | 92.9<br>(58.8-99.0) | 85.8<br>(61.9-95.2) | 81.1<br>(56.9-92.5) | 95.7<br>(83.2-98.9) | 94.3<br>(82.8-98.2) | 92.5<br>(83.9-96.6) | 95.3<br>(85.9-98.5) |
| 15-64 years                       | 64.1<br>(62.5-65.7)          | 63.7<br>(62.1-65.2) | 64.9<br>(63.3-66.5) | 64.1<br>(62.5-65.7) | 67.6<br>(66.2-68.9) | 67.8<br>(66.8-68.8) | 69.7<br>(68.8-70.5) | 70.7<br>(69.7-71.7) |
| ≥65 years                         | 57.4<br>(54.9-59.9)          | 57.1<br>(54.8-59.3) | 60.9<br>(58.6-63.1) | 59.8<br>(57.7-61.9) | 57.4<br>(55.5-59.2) | 56.5<br>(55.0-58.0) | 58.1<br>(56.8-59.4) | 60.0<br>(58.4-61.6) |
| <b>Nasopharynx cancer</b>         |                              |                     |                     |                     |                     |                     |                     |                     |
| All                               | 38.0<br>(33.6-42.3)          | 43.4<br>(39.2-47.4) | 49.1<br>(44.9-53.1) | 49.6<br>(45.8-53.2) | 59.1<br>(56.1-62.0) | 56.7<br>(54.3-59.1) | 58.5<br>(56.3-60.5) | 62.7<br>(60.1-65.2) |
| 0-14 years                        | 60.1<br>(31.8-79.8)          | 43.5<br>(16.3-68.2) | 84.7<br>(51.1-96.0) | 70.7<br>(43.2-86.7) | 76.6<br>(48.8-90.6) | 79.0<br>(60.9-89.5) | 85.5<br>(71.8-92.9) | 80.2<br>(64.8-89.3) |
| 15-64 years                       | 40.6<br>(35.6-45.5)          | 48.7<br>(43.9-53.4) | 51.7<br>(46.8-56.4) | 55.6<br>(51.1-59.9) | 65.4<br>(62.0-68.6) | 61.6<br>(58.8-64.2) | 63.4<br>(61.0-65.6) | 68.0<br>(65.1-70.7) |
| ≥65 years                         | 27.4<br>(19.0-36.5)          | 27.5<br>(20.0-35.4) | 40.1<br>(31.9-48.2) | 33.9<br>(27.1-40.9) | 40.3<br>(34.1-46.4) | 40.4<br>(35.3-45.5) | 40.0<br>(35.3-44.6) | 43.1<br>(37.1-48.9) |
| <b>Other pharynx cancer</b>       |                              |                     |                     |                     |                     |                     |                     |                     |
| All                               | 29.1<br>(26.9-31.4)          | 31.6<br>(29.6-33.7) | 30.8<br>(28.9-32.8) | 35.7<br>(33.6-37.7) | 42.5<br>(40.7-44.3) | 49.7<br>(48.4-51.1) | 57.0<br>(55.9-58.1) | 61.1<br>(59.8-62.4) |
| 0-14 years                        | -                            | 33.5<br>(0.9-77.7)  | 66.7<br>(5.4-94.5)  | 100.0               | 100.0               | 50.0<br>(0.6-91.0)  | 100.0               | -                   |
| 15-64 years                       | 32.2<br>(29.4-34.9)          | 33.7<br>(31.1-36.2) | 34.4<br>(31.8-36.9) | 39.6<br>(36.9-42.2) | 48.0<br>(45.7-50.3) | 57.6<br>(56.0-59.2) | 62.8<br>(61.6-64.0) | 66.7<br>(65.3-68.1) |
| ≥65 years                         | 24.0<br>(20.4-27.7)          | 28.1<br>(24.7-31.7) | 25.4<br>(22.3-28.6) | 30.4<br>(27.2-33.5) | 33.8<br>(30.8-36.7) | 33.5<br>(31.2-35.9) | 42.0<br>(39.8-44.2) | 45.9<br>(43.1-48.6) |
| <b>Esophageal cancer</b>          |                              |                     |                     |                     |                     |                     |                     |                     |

**eTable 3: Five-year relative survival, 1973-2013, by age group (continued).\***

| Age                                         | Relative 5-year Survival (%) |                     |                     |                     |                     |                     |                     |                     |
|---------------------------------------------|------------------------------|---------------------|---------------------|---------------------|---------------------|---------------------|---------------------|---------------------|
|                                             | 1973-1977                    | 1978-1982           | 1983-1987           | 1988-1992           | 1993-1997           | 1998-2002           | 2003-2007           | 2008-2013           |
| All                                         | 4.8<br>(4.0-5.7)             | 5.8<br>(5.0-6.7)    | 8.6<br>(7.7-9.6)    | 11.4<br>(10.4-12.5) | 12.6<br>(11.7-13.6) | 15.4<br>(14.6-16.1) | 17.3<br>(16.6-18.0) | 18.2<br>(17.3-19.1) |
| 0-14 years                                  | -                            | -                   | -                   | 100.0               | -                   | 100.0               | 0.0                 | -                   |
| 15-64 years                                 | 5.5<br>(4.4-6.8)             | 5.9<br>(4.8-7.1)    | 9.9<br>(8.4-11.4)   | 13.2<br>(11.6-14.9) | 15.5<br>(14.1-17.1) | 17.8<br>(16.7-19.0) | 19.7<br>(18.7-20.7) | 20.0<br>(18.8-21.3) |
| ≥65 years                                   | 3.9<br>(2.9-5.2)             | 5.7<br>(4.5-7.1)    | 7.5<br>(6.3-8.9)    | 10.0<br>(8.7-11.5)  | 10.5<br>(9.4-11.7)  | 13.5<br>(12.5-14.5) | 15.3<br>(14.4-16.2) | 16.6<br>(15.3-17.9) |
| <b>Stomach cancer</b>                       |                              |                     |                     |                     |                     |                     |                     |                     |
| All                                         | 14.6<br>(13.8-15.5)          | 16.7<br>(15.8-17.5) | 17.5<br>(16.6-18.4) | 20.6<br>(19.7-21.5) | 21.8<br>(21.0-22.7) | 24.1<br>(23.4-24.8) | 27.4<br>(26.8-28.0) | 31.3<br>(30.5-32.1) |
| 0-14 years                                  | -                            | -                   | 100.0               | 50.0<br>(0.6-91.1)  | 100.0               | 72.7<br>(37.1-90.3) | 87.5<br>(38.6-98.2) | 61.4<br>(21.4-85.7) |
| 15-64 years                                 | 16.6<br>(15.2-17.9)          | 18.6<br>(17.2-20.1) | 20.1<br>(18.7-21.7) | 22.2<br>(20.7-23.7) | 23.6<br>(22.3-24.9) | 27.2<br>(26.2-28.3) | 30.6<br>(29.7-31.5) | 34.4<br>(33.3-35.6) |
| ≥65 years                                   | 13.6<br>(12.5-14.7)          | 15.6<br>(14.5-16.8) | 16.2<br>(15.0-17.3) | 19.8<br>(18.7-21.0) | 20.9<br>(19.8-21.9) | 22.3<br>(21.4-23.1) | 25.1<br>(24.3-25.9) | 28.9<br>(27.8-30.1) |
| <b>Colon and rectum cancer</b>              |                              |                     |                     |                     |                     |                     |                     |                     |
| All                                         | 48.8<br>(48.2-49.4)          | 52.3<br>(51.8-52.9) | 57.4<br>(56.8-57.9) | 60.5<br>(60.0-61.0) | 60.5<br>(60.1-61.0) | 63.5<br>(63.1-63.8) | 64.7<br>(64.4-65.0) | 64.9<br>(64.5-65.3) |
| 0-14 years                                  | 100.0                        | 92.3<br>(56.6-98.9) | 50.0<br>(0.6-91.0)  | 66.7<br>(5.4-94.6)  | 44.7<br>(15.8-70.3) | 68.5<br>(42.8-84.5) | 74.1<br>(44.6-89.5) | 89.2<br>(61.4-97.4) |
| 15-64 years                                 | 52.2<br>(51.4-53.1)          | 56.2<br>(55.4-57.0) | 59.9<br>(59.1-60.7) | 62.9<br>(62.2-63.7) | 62.8<br>(62.2-63.5) | 67.0<br>(66.6-67.5) | 69.1<br>(68.7-69.5) | 68.9<br>(68.4-69.4) |
| ≥65 years                                   | 46.8<br>(46.0-47.6)          | 50.2<br>(49.5-51.0) | 56.2<br>(55.5-56.9) | 59.4<br>(58.8-60.1) | 59.6<br>(59.0-60.2) | 61.5<br>(61.0-62.0) | 61.6<br>(61.2-62.1) | 61.4<br>(60.8-62.0) |
| <b>Liver cancer</b>                         |                              |                     |                     |                     |                     |                     |                     |                     |
| All                                         | 3.5<br>(2.6-4.5)             | 3.3<br>(2.5-4.2)    | 5.5<br>(4.7-6.5)    | 5.6<br>(4.9-6.4)    | 7.1<br>(6.5-7.7)    | 11.5<br>(11.0-12.1) | 15.8<br>(15.3-16.3) | 17.5<br>(16.9-18.1) |
| 0-14 years                                  | 27.6<br>(14.9-41.9)          | 34.4<br>(19.9-49.4) | 62.3<br>(48.5-73.5) | 55.5<br>(42.8-66.4) | 55.7<br>(44.9-65.2) | 58.3<br>(50.8-65.1) | 70.2<br>(64.2-75.4) | 80.3<br>(75.0-84.5) |
| 15-64 years                                 | 4.0<br>(2.8-5.6)             | 3.8<br>(2.6-5.2)    | 5.7<br>(4.4-7.2)    | 6.6<br>(5.4-7.9)    | 8.2<br>(7.2-9.2)    | 14.9<br>(14.0-15.7) | 19.0<br>(18.3-19.7) | 20.4<br>(19.7-21.2) |
| ≥65 years                                   | 2.0<br>(1.1-3.2)             | 1.7<br>(1.0-2.7)    | 3.0<br>(2.1-4.1)    | 3.2<br>(2.4-4.1)    | 5.0<br>(4.3-5.8)    | 6.9<br>(6.3-7.6)    | 10.1<br>(9.4-10.7)  | 11.7<br>(10.8-12.6) |
| <b>Gallbladder and biliary tract cancer</b> |                              |                     |                     |                     |                     |                     |                     |                     |
| All                                         | 8.7<br>(7.1-10.6)            | 10.2<br>(8.4-12.0)  | 12.9<br>(10.9-15.0) | 14.0<br>(12.1-16.2) | 13.7<br>(12.0-15.6) | 14.7<br>(13.3-16.3) | 17.5<br>(16.2-18.9) | 18.7<br>(17.0-20.4) |
| 0-14 years                                  | -                            | -                   | -                   | -                   | -                   | -                   | 100.0               | -                   |

eTable 3: Five-year relative survival, 1973-2013, by age group (continued).\*

| Age                                 | Relative 5-year Survival (%) |                     |                     |                     |                     |                     |                     |                     |
|-------------------------------------|------------------------------|---------------------|---------------------|---------------------|---------------------|---------------------|---------------------|---------------------|
|                                     | 1973-1977                    | 1978-1982           | 1983-1987           | 1988-1992           | 1993-1997           | 1998-2002           | 2003-2007           | 2008-2013           |
| 15-64 years                         | 9.7<br>(6.7-13.4)            | 12.7<br>(9.4-16.6)  | 17.8<br>(13.8-22.2) | 16.9<br>(13.1-21.2) | 16.5<br>(13.3-20.1) | 17.3<br>(14.8-20.0) | 20.7<br>(18.4-23.0) | 23.4<br>(20.6-26.3) |
| ≥65 years                           | 8.5<br>(6.5-10.7)            | 9.3<br>(7.4-11.4)   | 11.1<br>(8.9-13.5)  | 13.0<br>(10.7-15.5) | 12.6<br>(10.6-14.8) | 13.6<br>(11.9-15.5) | 15.8<br>(14.2-17.5) | 16.2<br>(14.1-18.3) |
| Pancreatic cancer                   |                              |                     |                     |                     |                     |                     |                     |                     |
| All                                 | 2.6<br>(2.2-3.0)             | 2.7<br>(2.4-3.1)    | 3.1<br>(2.8-3.5)    | 4.1<br>(3.7-4.5)    | 4.3<br>(3.9-4.6)    | 5.1<br>(4.8-5.4)    | 6.0<br>(5.8-6.3)    | 8.0<br>(7.6-8.4)    |
| 0-14 years                          | -                            | 0.0                 | 100.0               | 66.9<br>(19.4-90.6) | 100.0               | 75.1<br>(31.4-93.1) | 71.5<br>(25.8-92.0) | 75.2<br>(38.6-91.8) |
| 15-64 years                         | 3.6<br>(3.0-4.4)             | 3.9<br>(3.3-4.6)    | 4.5<br>(3.8-5.3)    | 6.7<br>(5.8-7.6)    | 7.0<br>(6.3-7.8)    | 8.3<br>(7.8-8.9)    | 9.3<br>(8.8-9.8)    | 12.0<br>(11.3-12.7) |
| ≥65 years                           | 1.9<br>(1.5-2.4)             | 2.0<br>(1.6-2.4)    | 2.4<br>(2.0-2.9)    | 2.8<br>(2.4-3.3)    | 3.0<br>(2.6-3.3)    | 3.4<br>(3.1-3.7)    | 4.1<br>(3.8-4.3)    | 5.4<br>(5.0-5.9)    |
| Larynx cancer                       |                              |                     |                     |                     |                     |                     |                     |                     |
| All                                 | 65.5<br>(63.7-67.3)          | 66.3<br>(64.6-67.9) | 66.5<br>(64.8-68.1) | 65.0<br>(63.4-66.6) | 63.9<br>(62.4-65.4) | 61.3<br>(60.1-62.4) | 60.4<br>(59.3-61.4) | 61.7<br>(60.3-63.0) |
| 0-14 years                          | -                            | -                   | -                   | -                   | 100.0               | -                   | 100.0               | 100.0               |
| 15-64 years                         | 69.2<br>(67.1-71.2)          | 69.9<br>(67.9-71.8) | 68.3<br>(66.3-70.3) | 67.9<br>(65.9-69.9) | 65.3<br>(63.3-67.1) | 63.3<br>(61.8-64.7) | 62.3<br>(61.0-63.5) | 62.2<br>(60.6-63.8) |
| ≥65 years                           | 58.7<br>(55.1-62.0)          | 60.8<br>(57.7-63.6) | 64.2<br>(61.4-66.9) | 61.8<br>(59.2-64.3) | 62.6<br>(60.2-64.9) | 58.9<br>(57.0-60.7) | 58.0<br>(56.3-59.7) | 60.9<br>(58.7-63.1) |
| Tracheal, bronchus, and lung cancer |                              |                     |                     |                     |                     |                     |                     |                     |
| All                                 | 11.9<br>(11.5-12.2)          | 12.8<br>(12.5-13.2) | 12.9<br>(12.6-13.2) | 13.4<br>(13.1-13.7) | 14.2<br>(13.9-14.4) | 14.7<br>(14.5-14.9) | 16.3<br>(16.1-16.4) | 18.0<br>(17.7-18.2) |
| 0-14 years                          | 83.3<br>(27.3-97.5)          | 100.0               | 60.0<br>(12.6-88.2) | 100.0               | 66.8<br>(19.4-90.5) | 65.3<br>(42.4-81.0) | 75.1<br>(56.2-86.7) | 83.0<br>(63.1-92.7) |
| 15-64 years                         | 14.0<br>(13.5-14.5)          | 15.7<br>(15.2-16.2) | 15.7<br>(15.2-16.2) | 15.9<br>(15.5-16.4) | 17.2<br>(16.7-17.6) | 18.0<br>(17.6-18.3) | 19.4<br>(19.1-19.8) | 20.9<br>(20.5-21.3) |
| ≥65 years                           | 9.4<br>(8.9-9.8)             | 9.9<br>(9.5-10.4)   | 10.6<br>(10.2-11.0) | 11.7<br>(11.3-12.1) | 12.4<br>(12.1-12.7) | 12.8<br>(12.6-13.0) | 14.4<br>(14.2-14.6) | 16.3<br>(16.0-16.6) |
| Malignant skin melanoma             |                              |                     |                     |                     |                     |                     |                     |                     |
| All                                 | 79.7<br>(78.4-80.8)          | 82.5<br>(81.5-83.4) | 86.3<br>(85.5-87.1) | 88.7<br>(88.0-89.4) | 89.6<br>(89.0-90.2) | 90.9<br>(90.5-91.3) | 91.2<br>(90.9-91.6) | 91.6<br>(91.1-92.0) |
| 0-14 years                          | 84.7<br>(64.0-94.0)          | 100.0               | 80.8<br>(62.0-90.9) | 97.1<br>(80.4-99.6) | 91.4<br>(78.4-96.8) | 93.0<br>(86.8-96.3) | 97.3<br>(93.4-98.9) | 95.0<br>(89.7-97.6) |
| 15-64 years                         | 81.9<br>(80.7-83.1)          | 85.1<br>(84.1-86.0) | 87.6<br>(86.8-88.4) | 90.3<br>(89.7-91.0) | 91.3<br>(90.8-91.8) | 92.5<br>(92.1-92.8) | 92.9<br>(92.6-93.2) | 92.8<br>(92.4-93.1) |
| ≥65 years                           | 70.9<br>(67.1-74.4)          | 72.7<br>(69.7-75.5) | 82.5<br>(80.0-84.6) | 84.4<br>(82.4-86.2) | 85.6<br>(84.0-87.0) | 87.3<br>(86.2-88.3) | 87.7<br>(86.9-88.5) | 89.4<br>(88.3-90.4) |

eTable 3: Five-year relative survival, 1973-2013, by age group (continued).\*

| Age                    | Relative 5-year Survival (%) |                     |                     |                     |                     |                     |                     |                     |
|------------------------|------------------------------|---------------------|---------------------|---------------------|---------------------|---------------------|---------------------|---------------------|
|                        | 1973-1977                    | 1978-1982           | 1983-1987           | 1988-1992           | 1993-1997           | 1998-2002           | 2003-2007           | 2008-2013           |
| <b>Breast cancer</b>   |                              |                     |                     |                     |                     |                     |                     |                     |
| All                    | 74.1<br>(73.6-74.6)          | 75.1<br>(74.6-75.6) | 79.5<br>(79.0-79.9) | 84.9<br>(84.5-85.3) | 86.5<br>(86.2-86.8) | 88.8<br>(88.6-89.0) | 89.1<br>(89.0-89.3) | 89.7<br>(89.4-89.9) |
| 0-14 years             | -                            | 100.0               | -                   | 100.0               | 100.0               | 100.0               | 100.0               | 100.0               |
| 15-64 years            | 74.8<br>(74.2-75.4)          | 75.3<br>(74.8-75.9) | 79.1<br>(78.6-79.6) | 83.9<br>(83.4-84.2) | 86.0<br>(85.7-86.3) | 88.7<br>(88.5-88.9) | 89.6<br>(89.4-89.8) | 89.8<br>(89.6-90.1) |
| ≥65 years              | 73.1<br>(72.1-74.1)          | 74.9<br>(74.0-75.8) | 80.1<br>(79.3-80.8) | 86.4<br>(85.7-87.0) | 87.3<br>(86.7-87.9) | 89.0<br>(88.6-89.4) | 88.4<br>(88.0-88.8) | 89.5<br>(89.0-90.0) |
| <b>Cervical cancer</b> |                              |                     |                     |                     |                     |                     |                     |                     |
| All                    | 67.9<br>(66.6-69.2)          | 66.9<br>(65.5-68.2) | 67.4<br>(66.0-68.7) | 70.1<br>(68.8-71.3) | 71.0<br>(70.0-72.1) | 70.8<br>(69.9-71.6) | 68.6<br>(67.8-69.4) | 66.3<br>(65.4-67.3) |
| 0-14 years             | 100.0                        | 75.0<br>(12.8-96.1) | 100.0               | 100.0               | 100.0               | 100.0               | 100.0               | 100.0               |
| 15-64 years            | 73.4<br>(72.0-74.7)          | 72.7<br>(71.3-74.1) | 73.6<br>(72.2-75.0) | 75.6<br>(74.3-76.8) | 74.8<br>(73.8-75.9) | 75.6<br>(74.7-76.4) | 72.8<br>(72.0-73.6) | 70.4<br>(69.4-71.4) |
| ≥65 years              | 49.9<br>(46.7-53.0)          | 48.9<br>(45.7-52.0) | 46.7<br>(43.4-49.9) | 48.6<br>(45.4-51.7) | 54.8<br>(51.8-57.6) | 49.2<br>(46.9-51.5) | 48.0<br>(45.8-50.2) | 46.3<br>(43.4-49.1) |
| <b>Uterine cancer</b>  |                              |                     |                     |                     |                     |                     |                     |                     |
| All                    | 87.3<br>(86.6-88.0)          | 82.5<br>(81.7-83.3) | 82.6<br>(81.7-83.4) | 84.0<br>(83.2-84.8) | 83.6<br>(82.9-84.3) | 83.3<br>(82.7-83.8) | 82.9<br>(82.4-83.3) | 82.7<br>(82.2-83.2) |
| 0-14 years             | -                            | 0.0                 | 0.0                 | -                   | 100.0               | 100.0               | 100.0               | -                   |
| 15-64 years            | 92.8<br>(92.1-93.4)          | 89.1<br>(88.3-89.9) | 88.9<br>(87.9-89.8) | 88.4<br>(87.5-89.3) | 88.7<br>(87.9-89.4) | 88.2<br>(87.6-88.7) | 87.7<br>(87.3-88.2) | 86.6<br>(86.0-87.1) |
| ≥65 years              | 75.9<br>(74.2-77.5)          | 73.3<br>(71.7-74.8) | 76.4<br>(75.0-77.8) | 80.1<br>(78.7-81.4) | 78.6<br>(77.4-79.7) | 76.9<br>(75.9-77.8) | 75.1<br>(74.1-75.9) | 76.1<br>(75.0-77.2) |
| <b>Ovarian cancer</b>  |                              |                     |                     |                     |                     |                     |                     |                     |
| All                    | 36.2<br>(34.9-37.4)          | 37.7<br>(36.5-38.9) | 38.8<br>(37.6-39.9) | 39.8<br>(38.7-40.9) | 42.6<br>(41.6-43.6) | 44.0<br>(43.3-44.8) | 44.3<br>(43.6-45.0) | 47.2<br>(46.3-48.1) |
| 0-14 years             | 83.4<br>(68.2-91.7)          | 86.7<br>(68.3-94.8) | 88.9<br>(73.1-95.7) | 94.9<br>(81.0-98.7) | 91.3<br>(80.2-96.3) | 95.5<br>(89.5-98.1) | 92.6<br>(87.3-95.8) | 98.6<br>(94.2-99.7) |
| 15-64 years            | 43.6<br>(42.0-45.1)          | 47.5<br>(46.0-49.1) | 49.8<br>(48.3-51.4) | 53.7<br>(52.2-55.2) | 55.3<br>(54.0-56.6) | 56.8<br>(55.8-57.7) | 56.5<br>(55.6-57.4) | 59.9<br>(58.8-61.1) |
| ≥65 years              | 22.0<br>(20.1-23.9)          | 22.3<br>(20.6-24.1) | 24.1<br>(22.6-25.8) | 23.8<br>(22.3-25.3) | 27.8<br>(26.4-29.1) | 27.8<br>(26.8-28.9) | 27.5<br>(26.6-28.5) | 29.6<br>(28.3-30.9) |
| <b>Prostate cancer</b> |                              |                     |                     |                     |                     |                     |                     |                     |
| All                    | 65.7<br>(64.9-66.6)          | 70.8<br>(70.1-71.6) | 75.9<br>(75.3-76.6) | 90.7<br>(90.3-91.1) | 96.1<br>(95.8-96.4) | 98.9<br>(98.6-99.1) | 98.9<br>(98.7-99.0) | 98.6<br>(98.4-98.8) |
| 0-14 years             | 0.0                          | 33.4<br>(0.9-77.5)  | 33.4<br>(4.6-67.6)  | 100.0               | 83.4<br>(27.2-97.5) | 70.1<br>(32.8-89.3) | 57.3<br>(28.4-78.1) | 58.9<br>(21.7-83.3) |

eTable 3: Five-year relative survival, 1973-2013, by age group (continued).\*

| Age                             | Relative 5-year Survival (%) |                     |                     |                     |                     |                     |                     |                     |
|---------------------------------|------------------------------|---------------------|---------------------|---------------------|---------------------|---------------------|---------------------|---------------------|
|                                 | 1973-1977                    | 1978-1982           | 1983-1987           | 1988-1992           | 1993-1997           | 1998-2002           | 2003-2007           | 2008-2013           |
| 15-64 years                     | 71.2<br>(69.6-72.6)          | 75.8<br>(74.5-77.0) | 78.0<br>(76.9-79.1) | 90.5<br>(89.9-91.2) | 97.0<br>(96.6-97.3) | 98.7<br>(98.5-98.9) | 99.0<br>(98.8-99.1) | 99.0<br>(98.8-99.2) |
| ≥65 years                       | 64.2<br>(63.1-65.2)          | 69.4<br>(68.5-70.3) | 75.4<br>(74.6-76.2) | 90.8<br>(90.2-91.3) | 95.7<br>(95.3-96.1) | 99.0<br>(98.6-99.2) | 98.9<br>(98.6-99.1) | 98.2<br>(97.8-98.5) |
| Testicular cancer               |                              |                     |                     |                     |                     |                     |                     |                     |
| All                             | 79.8<br>(77.7-81.8)          | 90.6<br>(89.1-91.9) | 92.8<br>(91.6-93.8) | 95.4<br>(94.5-96.2) | 95.1<br>(94.3-95.7) | 95.5<br>(94.9-96.0) | 95.0<br>(94.5-95.5) | 95.5<br>(95.0-96.0) |
| 0-14 years                      | 78.0<br>(58.6-89.0)          | 97.1<br>(76.9-99.7) | 100.0               | 94.5<br>(78.7-98.7) | 96.2<br>(84.2-99.1) | 97.8<br>(89.6-99.6) | 94.8<br>(88.5-97.7) | 100.0               |
| 15-64 years                     | 80.6<br>(78.4-82.5)          | 91.0<br>(89.6-92.2) | 93.1<br>(92.0-94.1) | 95.4<br>(94.5-96.1) | 95.3<br>(94.6-96.0) | 95.8<br>(95.3-96.3) | 95.1<br>(94.6-95.5) | 95.6<br>(95.1-96.1) |
| ≥65 years                       | 47.8<br>(26.9-66.0)          | 69.3<br>(46.6-83.9) | 71.3<br>(52.7-83.7) | 94.9<br>(70.7-99.2) | 75.8<br>(61.3-85.5) | 70.0<br>(57.3-79.6) | 90.0<br>(76.2-96.0) | 84.9<br>(74.4-91.4) |
| Kidney cancer                   |                              |                     |                     |                     |                     |                     |                     |                     |
| All                             | 49.2<br>(47.6-50.7)          | 51.1<br>(49.6-52.5) | 54.6<br>(53.3-55.9) | 58.8<br>(57.6-59.9) | 61.0<br>(60.0-61.9) | 65.0<br>(64.3-65.6) | 71.1<br>(70.6-71.6) | 74.4<br>(73.9-75.0) |
| 0-14 years                      | 75.0<br>(67.8-80.9)          | 79.9<br>(73.9-84.6) | 83.2<br>(77.6-87.5) | 91.3<br>(86.9-94.2) | 87.8<br>(84.0-90.7) | 88.8<br>(85.9-91.1) | 88.1<br>(85.4-90.3) | 92.0<br>(89.1-94.2) |
| 15-64 years                     | 52.6<br>(50.6-54.5)          | 56.0<br>(54.1-57.8) | 61.4<br>(59.7-63.0) | 63.7<br>(62.2-65.1) | 66.2<br>(65.0-67.4) | 71.0<br>(70.2-71.8) | 76.6<br>(76.0-77.1) | 79.3<br>(78.6-79.9) |
| ≥65 years                       | 42.9<br>(40.3-45.4)          | 43.1<br>(40.8-45.3) | 46.1<br>(44.1-48.1) | 52.3<br>(50.5-54.1) | 54.1<br>(52.6-55.6) | 57.1<br>(56.0-58.1) | 63.7<br>(62.8-64.6) | 67.5<br>(66.4-68.5) |
| Bladder cancer                  |                              |                     |                     |                     |                     |                     |                     |                     |
| All                             | 71.5<br>(70.4-72.5)          | 75.1<br>(74.1-76.1) | 77.1<br>(76.2-78.0) | 79.1<br>(78.2-79.9) | 79.2<br>(78.5-80.0) | 78.0<br>(77.5-78.6) | 77.8<br>(77.3-78.2) | 77.0<br>(76.4-77.6) |
| 0-14 years                      | 80.0<br>(50.0-93.1)          | 86.3<br>(31.6-98.1) | 83.5<br>(27.0-97.5) | 91.8<br>(53.5-98.8) | 83.4<br>(27.1-97.5) | 75.2<br>(52.8-88.1) | 86.3<br>(62.8-95.4) | 82.2<br>(53.9-94.0) |
| 15-64 years                     | 81.3<br>(80.0-82.5)          | 85.4<br>(84.3-86.5) | 85.5<br>(84.4-86.5) | 86.2<br>(85.2-87.2) | 87.0<br>(86.1-87.8) | 85.4<br>(84.8-86.1) | 84.1<br>(83.5-84.7) | 83.2<br>(82.5-84.0) |
| ≥65 years                       | 64.7<br>(63.1-66.2)          | 68.4<br>(67.0-69.8) | 71.9<br>(70.6-73.2) | 75.3<br>(74.1-76.5) | 75.4<br>(74.4-76.4) | 74.2<br>(73.5-75.0) | 74.4<br>(73.8-75.1) | 73.9<br>(73.0-74.7) |
| Brain and nervous system cancer |                              |                     |                     |                     |                     |                     |                     |                     |
| All                             | 20.8<br>(19.6-22.0)          | 23.9<br>(22.8-25.1) | 26.8<br>(25.7-27.9) | 29.6<br>(28.5-30.6) | 31.8<br>(30.9-32.8) | 32.7<br>(32.0-33.4) | 33.8<br>(33.2-34.4) | 33.7<br>(33.0-34.4) |
| 0-14 years                      | 51.6<br>(47.5-55.5)          | 57.0<br>(53.1-60.8) | 62.8<br>(59.1-66.2) | 63.8<br>(60.6-66.8) | 70.5<br>(67.9-73.0) | 71.2<br>(69.3-73.0) | 73.5<br>(71.8-75.1) | 72.7<br>(70.7-74.5) |
| 15-64 years                     | 21.5<br>(20.0-23.0)          | 26.8<br>(25.3-28.3) | 32.1<br>(30.6-33.6) | 35.9<br>(34.4-37.4) | 37.3<br>(36.0-38.6) | 38.1<br>(37.1-39.0) | 39.5<br>(38.7-40.4) | 39.8<br>(38.8-40.9) |

**eTable 3: Five-year relative survival, 1973-2013, by age group (continued).\***

| Age                  | Relative 5-year Survival (%) |                     |                     |                     |                     |                     |                     |                      |
|----------------------|------------------------------|---------------------|---------------------|---------------------|---------------------|---------------------|---------------------|----------------------|
|                      | 1973-1977                    | 1978-1982           | 1983-1987           | 1988-1992           | 1993-1997           | 1998-2002           | 2003-2007           | 2008-2013            |
| ≥65 years            | 3.1<br>(2.1-4.3)             | 4.4<br>(3.4-5.6)    | 4.0<br>(3.1-5.0)    | 5.2<br>(4.2-6.2)    | 5.9<br>(5.0-6.9)    | 5.6<br>(4.9-6.3)    | 6.8<br>(6.2-7.5)    | 7.1<br>(6.3-8.0)     |
| Thyroid cancer       |                              |                     |                     |                     |                     |                     |                     |                      |
| All                  | 91.1<br>(89.9-92.1)          | 92.7<br>(91.7-93.7) | 93.7<br>(92.7-94.5) | 94.3<br>(93.5-95.0) | 95.1<br>(94.5-95.7) | 96.4<br>(96.0-96.7) | 97.5<br>(97.3-97.8) | 98.1<br>(97.8-98.4)  |
| 0-14 years           | 100.0                        | 100.0               | 97.8<br>(83.5-99.7) | 100.0               | 98.5<br>(88.6-99.8) | 97.1<br>(92.3-98.9) | 99.1<br>(95.7-99.8) | 99.6<br>(97.3-100.0) |
| 15-64 years          | 96.3<br>(95.3-97.0)          | 97.1<br>(96.3-97.8) | 96.9<br>(96.2-97.5) | 97.7<br>(97.1-98.2) | 97.8<br>(97.3-98.1) | 98.3<br>(98.0-98.6) | 98.8<br>(98.6-99.0) | 99.2<br>(98.9-99.3)  |
| ≥65 years            | 59.1<br>(53.6-64.1)          | 68.2<br>(63.2-72.7) | 75.6<br>(71.1-79.4) | 76.7<br>(72.9-80.1) | 80.9<br>(77.9-83.6) | 85.3<br>(83.3-87.1) | 90.2<br>(88.9-91.3) | 92.6<br>(91.1-93.9)  |
| Mesothelioma         |                              |                     |                     |                     |                     |                     |                     |                      |
| All                  | 9.4<br>(6.9-12.4)            | 6.9<br>(5.1-9.1)    | 6.3<br>(4.7-8.2)    | 7.4<br>(5.8-9.2)    | 7.2<br>(5.9-8.8)    | 8.0<br>(6.9-9.2)    | 8.5<br>(7.4-9.6)    | 9.1<br>(7.6-10.8)    |
| 0-14 years           | -                            | -                   | 0.0                 | -                   | -                   | 100.0               | -                   | -                    |
| 15-64 years          | 12.6<br>(8.9-17.0)           | 10.9<br>(7.7-14.8)  | 11.1<br>(7.9-14.9)  | 11.8<br>(8.6-15.4)  | 12.2<br>(9.3-15.6)  | 16.6<br>(13.9-19.4) | 14.4<br>(12.2-16.9) | 16.9<br>(13.4-20.7)  |
| ≥65 years            | 4.6<br>(2.0-8.7)             | 3.3<br>(1.7-5.8)    | 3.1<br>(1.7-5.0)    | 5.0<br>(3.5-7.1)    | 4.9<br>(3.5-6.6)    | 4.0<br>(3.0-5.1)    | 5.7<br>(4.7-6.9)    | 5.8<br>(4.4-7.5)     |
| Hodgkin lymphoma     |                              |                     |                     |                     |                     |                     |                     |                      |
| All                  | 68.6<br>(66.8-70.4)          | 72.1<br>(70.4-73.8) | 78.0<br>(76.4-79.4) | 80.7<br>(79.3-82.0) | 83.0<br>(81.8-84.1) | 83.6<br>(82.7-84.5) | 85.0<br>(84.2-85.7) | 86.6<br>(85.7-87.4)  |
| 0-14 years           | 82.9<br>(76.5-87.7)          | 86.7<br>(80.2-91.2) | 89.4<br>(83.2-93.5) | 91.1<br>(85.6-94.6) | 94.3<br>(90.1-96.8) | 94.7<br>(91.9-96.6) | 96.8<br>(94.8-98.0) | 97.1<br>(94.5-98.5)  |
| 15-64 years          | 74.8<br>(72.9-76.6)          | 79.1<br>(77.4-80.7) | 82.8<br>(81.3-84.3) | 85.6<br>(84.2-86.8) | 87.1<br>(86.0-88.2) | 88.3<br>(87.4-89.1) | 90.1<br>(89.4-90.8) | 90.8<br>(90.0-91.6)  |
| ≥65 years            | 29.2<br>(24.2-34.3)          | 28.3<br>(23.5-33.2) | 38.3<br>(32.6-44.0) | 45.4<br>(40.0-50.7) | 48.0<br>(42.8-53.0) | 48.5<br>(44.7-52.2) | 50.7<br>(47.6-53.8) | 57.1<br>(53.3-60.6)  |
| Non-Hodgkin lymphoma |                              |                     |                     |                     |                     |                     |                     |                      |
| All                  | 45.3<br>(44.1-46.5)          | 48.7<br>(47.6-49.7) | 51.7<br>(50.8-52.7) | 50.3<br>(49.4-51.1) | 53.9<br>(53.2-54.5) | 63.5<br>(63.0-64.0) | 68.7<br>(68.3-69.1) | 71.2<br>(70.7-71.7)  |
| 0-14 years           | 45.4<br>(38.4-52.1)          | 57.4<br>(50.1-64.0) | 70.1<br>(63.5-75.7) | 74.4<br>(67.9-79.8) | 82.0<br>(77.3-85.7) | 83.0<br>(79.9-85.7) | 87.9<br>(85.3-90.1) | 90.4<br>(88.1-92.4)  |
| 15-64 years          | 53.8<br>(52.2-55.3)          | 58.1<br>(56.7-59.5) | 60.0<br>(58.7-61.2) | 54.4<br>(53.4-55.5) | 58.3<br>(57.5-59.2) | 71.7<br>(71.1-72.3) | 76.3<br>(75.8-76.8) | 78.7<br>(78.1-79.2)  |
| ≥65 years            | 34.8<br>(33.0-36.7)          | 38.0<br>(36.3-39.6) | 42.4<br>(41.0-43.9) | 45.0<br>(43.7-46.3) | 47.9<br>(46.8-49.0) | 54.2<br>(53.4-55.0) | 60.3<br>(59.6-61.0) | 62.9<br>(62.0-63.7)  |
| Multiple myeloma     |                              |                     |                     |                     |                     |                     |                     |                      |



**eTable 3: Five-year relative survival, 1973-2013, by age group (continued).\***

| Age                              | Relative 5-year Survival (%) |                     |                     |                     |                     |                     |                     |                     |
|----------------------------------|------------------------------|---------------------|---------------------|---------------------|---------------------|---------------------|---------------------|---------------------|
|                                  | 1973-1977                    | 1978-1982           | 1983-1987           | 1988-1992           | 1993-1997           | 1998-2002           | 2003-2007           | 2008-2013           |
| All                              | 23.4<br>(21.8-25.0)          | 26.6<br>(25.1-28.2) | 27.3<br>(25.9-28.8) | 28.6<br>(27.3-30.0) | 31.8<br>(30.7-33.0) | 35.2<br>(34.4-36.1) | 43.5<br>(42.7-44.3) | 49.8<br>(48.7-50.8) |
| 0-14 years                       | -                            | 0.0                 | -                   | -                   | -                   | -                   | 100.0               | -                   |
| 15-64 years                      | 28.9<br>(26.4-31.4)          | 32.5<br>(30.0-34.9) | 36.4<br>(34.0-38.9) | 37.5<br>(35.2-39.8) | 41.3<br>(39.4-43.2) | 48.7<br>(47.3-50.1) | 56.5<br>(55.3-57.6) | 62.7<br>(61.3-64.1) |
| ≥65 years                        | 19.5<br>(17.6-21.6)          | 22.7<br>(20.8-24.7) | 22.0<br>(20.3-23.8) | 23.7<br>(22.1-25.4) | 26.2<br>(24.7-27.6) | 26.2<br>(25.1-27.3) | 33.7<br>(32.7-34.7) | 39.6<br>(38.1-41.0) |
| <b>Leukemia</b>                  |                              |                     |                     |                     |                     |                     |                     |                     |
| All                              | 34.0<br>(32.9-35.1)          | 36.3<br>(35.3-37.4) | 40.2<br>(39.2-41.2) | 44.5<br>(43.6-45.5) | 47.5<br>(46.7-48.3) | 51.0<br>(50.4-51.7) | 57.2<br>(56.7-57.8) | 60.1<br>(59.4-60.7) |
| 0-14 years                       | 47.9<br>(44.7-51.0)          | 60.4<br>(57.2-63.5) | 64.2<br>(61.2-67.0) | 74.4<br>(72.0-76.7) | 76.9<br>(75.0-78.7) | 81.7<br>(80.3-83.0) | 84.3<br>(83.1-85.3) | 86.1<br>(84.8-87.2) |
| 15-64 years                      | 35.1<br>(33.5-36.7)          | 38.5<br>(36.9-40.0) | 42.6<br>(41.1-44.2) | 46.9<br>(45.5-48.4) | 51.9<br>(50.6-53.1) | 58.0<br>(57.1-58.8) | 64.0<br>(63.2-64.7) | 67.6<br>(66.8-68.4) |
| ≥65 years                        | 30.3<br>(28.6-32.0)          | 30.2<br>(28.6-31.7) | 33.8<br>(32.3-35.4) | 36.8<br>(35.4-38.2) | 37.3<br>(36.1-38.6) | 38.4<br>(37.4-39.3) | 45.1<br>(44.2-45.9) | 47.1<br>(46.0-48.2) |
| <b>Acute lymphoid leukemia</b>   |                              |                     |                     |                     |                     |                     |                     |                     |
| All                              | 39.2<br>(36.3-42.2)          | 50.5<br>(47.6-53.3) | 51.6<br>(49.0-54.2) | 56.8<br>(54.5-59.1) | 62.2<br>(60.3-64.1) | 64.0<br>(62.5-65.3) | 66.1<br>(64.9-67.3) | 68.1<br>(66.7-69.4) |
| 0-14 years                       | 55.7<br>(51.8-59.4)          | 68.7<br>(65.2-72.0) | 72.8<br>(69.6-75.7) | 81.1<br>(78.6-83.4) | 83.8<br>(81.9-85.5) | 86.9<br>(85.6-88.2) | 89.0<br>(87.9-90.0) | 90.5<br>(89.2-91.7) |
| 15-64 years                      | 15.2<br>(11.3-19.7)          | 25.7<br>(21.2-30.5) | 27.1<br>(23.1-31.2) | 31.3<br>(27.5-35.2) | 36.0<br>(32.7-39.3) | 38.0<br>(35.6-40.4) | 42.7<br>(40.6-44.8) | 47.2<br>(44.7-49.7) |
| ≥65 years                        | 5.0<br>(1.6-11.3)            | 7.6<br>(3.3-14.3)   | 5.7<br>(2.3-11.2)   | 3.8<br>(1.5-7.6)    | 7.4<br>(4.2-11.7)   | 6.2<br>(3.9-9.3)    | 11.9<br>(9.0-15.2)  | 15.5<br>(11.5-20.1) |
| <b>Chronic lymphoid leukemia</b> |                              |                     |                     |                     |                     |                     |                     |                     |
| All                              | 67.0<br>(64.7-69.2)          | 66.3<br>(64.1-68.3) | 71.2<br>(69.3-73.1) | 73.8<br>(72.0-75.5) | 74.9<br>(73.4-76.4) | 78.4<br>(77.2-79.5) | 81.1<br>(80.1-81.9) | 82.5<br>(81.2-83.6) |
| 0-14 years                       | 0.0                          | -                   | -                   | -                   | 100.0               | 0.0                 | 75.0<br>(12.7-96.1) | -                   |
| 15-64 years                      | 78.0<br>(75.0-80.7)          | 76.9<br>(74.0-79.4) | 80.4<br>(77.7-82.7) | 81.6<br>(79.2-83.8) | 83.5<br>(81.5-85.3) | 87.8<br>(86.5-89.0) | 90.0<br>(89.0-90.9) | 91.5<br>(90.1-92.6) |
| ≥65 years                        | 60.2<br>(57.0-63.3)          | 59.8<br>(56.8-62.6) | 66.2<br>(63.5-68.8) | 69.6<br>(67.1-72.0) | 70.3<br>(68.2-72.3) | 72.8<br>(71.1-74.3) | 75.7<br>(74.4-77.0) | 76.8<br>(75.0-78.5) |
| <b>Acute myeloid leukemia</b>    |                              |                     |                     |                     |                     |                     |                     |                     |
| All                              | 6.2<br>(5.2-7.2)             | 7.9<br>(6.9-9.0)    | 10.0<br>(8.8-11.2)  | 13.3<br>(12.1-14.5) | 17.4<br>(16.3-18.5) | 19.6<br>(18.8-20.5) | 23.8<br>(23.0-24.6) | 27.4<br>(26.4-28.3) |
| 0-14 years                       | 19.3<br>(13.1-26.3)          | 25.8<br>(18.5-33.7) | 29.9<br>(22.2-37.9) | 43.4<br>(35.8-50.8) | 46.3<br>(40.1-52.3) | 58.4<br>(53.8-62.8) | 64.3<br>(60.2-68.1) | 67.2<br>(62.8-71.1) |

**eTable 3: Five-year relative survival, 1973-2013, by age group (continued).\***

| Age                      | Relative 5-year Survival (%) |                     |                     |                     |                     |                     |                     |                     |
|--------------------------|------------------------------|---------------------|---------------------|---------------------|---------------------|---------------------|---------------------|---------------------|
|                          | 1973-1977                    | 1978-1982           | 1983-1987           | 1988-1992           | 1993-1997           | 1998-2002           | 2003-2007           | 2008-2013           |
| 15-64 years              | 7.8<br>(6.4-9.5)             | 11.5<br>(9.8-13.5)  | 16.2<br>(14.2-18.3) | 21.8<br>(19.6-24.0) | 28.7<br>(26.8-30.7) | 32.9<br>(31.4-34.4) | 38.5<br>(37.1-39.8) | 43.2<br>(41.6-44.7) |
| ≥65 years                | 2.7<br>(1.7-3.9)             | 2.7<br>(1.8-3.9)    | 2.2<br>(1.4-3.2)    | 2.9<br>(2.1-3.9)    | 3.8<br>(3.0-4.7)    | 4.2<br>(3.6-4.9)    | 5.4<br>(4.8-6.1)    | 6.8<br>(5.9-7.8)    |
| Chronic myeloid leukemia |                              |                     |                     |                     |                     |                     |                     |                     |
| All                      | 21.1<br>(18.8-23.5)          | 25.8<br>(23.3-28.3) | 24.1<br>(21.8-26.5) | 31.7<br>(29.3-34.0) | 36.1<br>(34.1-38.2) | 49.9<br>(48.2-51.6) | 61.5<br>(60.0-63.0) | 66.4<br>(64.6-68.1) |
| 0-14 years               | 31.3<br>(11.4-53.8)          | 26.4<br>(9.6-47.0)  | 37.2<br>(19.6-54.7) | 47.4<br>(28.4-64.3) | 43.0<br>(26.5-58.4) | 71.6<br>(59.1-81.0) | 68.1<br>(57.6-76.6) | 79.5<br>(69.4-86.5) |
| 15-64 years              | 27.4<br>(24.0-30.8)          | 32.1<br>(28.6-35.6) | 34.2<br>(30.7-37.8) | 40.8<br>(37.4-44.1) | 49.6<br>(46.7-52.3) | 69.0<br>(66.8-71.0) | 80.0<br>(78.4-81.5) | 83.2<br>(81.4-85.0) |
| ≥65 years                | 13.4<br>(10.3-16.8)          | 18.7<br>(15.3-22.4) | 13.5<br>(10.8-16.4) | 21.7<br>(18.6-25.0) | 21.0<br>(18.4-23.7) | 27.6<br>(25.2-30.0) | 38.2<br>(35.8-40.5) | 41.5<br>(38.3-44.7) |

\*Five-year relative survival is a measure of the net survival from cancer in the absence of other diseases for at least five years after diagnosis and is expressed as a percent. Numbers in parentheses are 95% uncertainty intervals. Five-year relative survival estimates are from: Surveillance, Epidemiology, and End Results (SEERS) Program. SEER\*Stat Database: Incidence - SEER 18 Regs Research Data + Hurricane Katrina Impacted Louisiana Cases, Nov 2015 Sub (1973-2013 Varying). National Cancer Institute, DCCPS, Surveillance Research Program, Surveillance Systems Branch; 2016. <http://seer.cancer.gov/>.

**eTable 4: Counties with the lowest and highest age-standardized mortality rate in 2014, by cause of death.**

| Rank                                       | County                                                     | Rate*               |
|--------------------------------------------|------------------------------------------------------------|---------------------|
| <b>Neoplasms</b>                           |                                                            |                     |
| 1                                          | Summit County, Colorado                                    | 70.7 (63.2-79.0)    |
| 2                                          | Pitkin County, Colorado                                    | 81.9 (73.0-91.0)    |
| 3                                          | Eagle County, Colorado                                     | 94.3 (86.0-103.9)   |
| 4                                          | Presidio County, Texas                                     | 103.5 (93.0-114.7)  |
| 5                                          | Hinsdale County, Colorado                                  | 110.3 (90.7-133.4)  |
| 6                                          | San Miguel County, Colorado                                | 113.6 (98.4-130.5)  |
| 7                                          | Aleutians East Borough, Aleutians West Census Area, Alaska | 116.1 (94.5-138.7)  |
| 8                                          | Los Alamos County, New Mexico                              | 118.4 (107.5-129.4) |
| 9                                          | Billings County, North Dakota                              | 120.3 (99.4-145.0)  |
| 10                                         | Grand County, Colorado                                     | 121.3 (109.9-133.0) |
| 3,101                                      | Lee County, Kentucky                                       | 317.3 (289.7-345.1) |
| 3,102                                      | Harlan County, Kentucky                                    | 319.8 (299.7-341.4) |
| 3,103                                      | Perry County, Kentucky                                     | 322.8 (302.7-345.0) |
| 3,104                                      | Anderson County, Texas                                     | 323.2 (305.3-341.3) |
| 3,105                                      | Owsley County, Kentucky                                    | 323.3 (293.9-354.5) |
| 3,106                                      | Marlboro County, South Carolina                            | 324.0 (304.2-345.1) |
| 3,107                                      | Breathitt County, Kentucky                                 | 329.1 (306.0-355.8) |
| 3,108                                      | Powell County, Kentucky                                    | 337.4 (309.7-367.4) |
| 3,109                                      | Madison County, Mississippi                                | 363.0 (345.2-382.5) |
| 3,110                                      | Union County, Florida                                      | 503.1 (464.9-545.4) |
|                                            | Difference between highest and lowest county               | 611.4%              |
| <b>Tracheal, bronchus, and lung cancer</b> |                                                            |                     |
| 1                                          | Summit County, Colorado                                    | 10.7 (9.2-12.3)     |
| 2                                          | Pitkin County, Colorado                                    | 13.3 (11.5-15.4)    |
| 3                                          | Cache County, Utah                                         | 13.7 (12.4-15.2)    |
| 4                                          | Presidio County, Texas                                     | 16.2 (13.6-19.0)    |
| 5                                          | Eagle County, Colorado                                     | 16.3 (14.4-18.6)    |
| 6                                          | Utah County, Utah                                          | 18.1 (16.8-19.4)    |
| 7                                          | Madison County, Idaho                                      | 18.7 (16.4-21.2)    |
| 8                                          | Los Alamos County, New Mexico                              | 19.2 (16.7-21.8)    |
| 9                                          | McKinley County, New Mexico                                | 19.3 (17.5-21.4)    |
| 10                                         | Summit County, Utah                                        | 19.9 (17.6-22.4)    |
| 3,101                                      | Harlan County, Kentucky                                    | 133.9 (124.1-144.4) |
| 3,102                                      | Gallatin County, Kentucky                                  | 135.1 (120.0-151.3) |
| 3,103                                      | Lee County, Kentucky                                       | 138.0 (124.4-152.1) |
| 3,104                                      | Owsley County, Kentucky                                    | 140.2 (124.7-156.9) |
| 3,105                                      | Leslie County, Kentucky                                    | 140.8 (126.8-155.8) |
| 3,106                                      | McCreary County, Kentucky                                  | 143.6 (131.4-156.3) |
| 3,107                                      | Breathitt County, Kentucky                                 | 144.4 (131.5-158.4) |
| 3,108                                      | Perry County, Kentucky                                     | 149.0 (137.3-161.5) |
| 3,109                                      | Powell County, Kentucky                                    | 150.8 (136.5-166.0) |
| 3,110                                      | Union County, Florida                                      | 231.2 (209.2-256.8) |
|                                            | Difference between highest and lowest county               | 2060.5%             |
| <b>Colon and rectum cancer</b>             |                                                            |                     |
| 1                                          | Summit County, Colorado                                    | 8.1 (7.0-9.3)       |
| 2                                          | Pitkin County, Colorado                                    | 9.3 (8.1-10.7)      |
| 3                                          | Eagle County, Colorado                                     | 10.9 (9.7-12.2)     |
| 4                                          | Presidio County, Texas                                     | 12.8 (11.0-14.9)    |
| 5                                          | San Miguel County, Colorado                                | 13.8 (11.6-16.2)    |
| 6                                          | Hinsdale County, Colorado                                  | 13.9 (11.3-17.1)    |
| 7                                          | San Juan County, Washington                                | 14.0 (12.5-15.6)    |
| 8                                          | Collier County, Florida                                    | 14.0 (13.2-14.9)    |
| 9                                          | Marin County, California                                   | 14.2 (13.3-15.2)    |
| 10                                         | Blaine County, Idaho                                       | 14.3 (12.7-15.8)    |

**eTable 4: Counties with the lowest and highest age-standardized mortality rate in 2014, by cause of death (continued).**

| Rank                   | County                                                     | Rate*            |
|------------------------|------------------------------------------------------------|------------------|
| 3,101                  | Bethel Census Area, Alaska                                 | 41.7 (35.0-48.6) |
| 3,102                  | Phillips County, Arkansas                                  | 42.2 (38.9-45.6) |
| 3,103                  | Sharkey County, Mississippi                                | 42.4 (38.0-47.5) |
| 3,104                  | Anderson County, Texas                                     | 42.9 (39.5-46.3) |
| 3,105                  | Bolivar County, Mississippi                                | 45.4 (41.8-49.1) |
| 3,106                  | Northwest Arctic Borough, Alaska                           | 46.5 (38.9-53.8) |
| 3,107                  | Madison County, Mississippi                                | 47.0 (43.9-50.3) |
| 3,108                  | Nome Census Area, Alaska                                   | 49.5 (42.8-56.6) |
| 3,109                  | Kusilvak Census Area, Alaska                               | 52.7 (44.5-61.0) |
| 3,110                  | Union County, Florida                                      | 58.4 (52.0-65.2) |
|                        | Difference between highest and lowest county               | 622.1%           |
| <b>Breast cancer</b>   |                                                            |                  |
| 1                      | Summit County, Colorado                                    | 5.2 (4.2-6.4)    |
| 2                      | Aleutians East Borough, Aleutians West Census Area, Alaska | 6.2 (4.4-8.4)    |
| 3                      | Pitkin County, Colorado                                    | 6.4 (5.1-7.7)    |
| 4                      | Eagle County, Colorado                                     | 6.8 (5.8-8.2)    |
| 5                      | San Miguel County, Colorado                                | 7.6 (5.9-9.6)    |
| 6                      | Presidio County, Texas                                     | 8.0 (6.5-9.8)    |
| 7                      | Mono County, California                                    | 8.1 (6.8-9.6)    |
| 8                      | Glades County, Florida                                     | 8.2 (7.0-9.8)    |
| 9                      | Grand County, Colorado                                     | 8.2 (6.9-10.0)   |
| 10                     | Campbell County, South Dakota                              | 8.3 (6.5-10.5)   |
| 3,101                  | Bolivar County, Mississippi                                | 23.8 (21.0-27.9) |
| 3,102                  | Sharkey County, Mississippi                                | 24.0 (20.2-28.8) |
| 3,103                  | Humphreys County, Mississippi                              | 24.5 (21.2-29.6) |
| 3,104                  | Wilcox County, Alabama                                     | 24.6 (21.5-28.8) |
| 3,105                  | Washington County, Mississippi                             | 25.2 (22.6-29.3) |
| 3,106                  | Petersburg City, Virginia                                  | 25.4 (22.7-29.8) |
| 3,107                  | Madison Parish, Louisiana                                  | 26.0 (22.5-30.8) |
| 3,108                  | Coahoma County, Mississippi                                | 26.4 (23.3-30.9) |
| 3,109                  | Holmes County, Mississippi                                 | 27.2 (23.8-31.8) |
| 3,110                  | Madison County, Mississippi                                | 29.5 (26.6-34.2) |
|                        | Difference between highest and lowest county               | 463.1%           |
| <b>Prostate cancer</b> |                                                            |                  |
| 1                      | Summit County, Colorado                                    | 5.5 (4.1-8.4)    |
| 2                      | Aleutians East Borough, Aleutians West Census Area, Alaska | 5.6 (3.5-9.3)    |
| 3                      | Northwest Arctic Borough, Alaska                           | 6.1 (4.2-10.1)   |
| 4                      | Presidio County, Texas                                     | 6.5 (4.7-10.3)   |
| 5                      | Starr County, Texas                                        | 6.5 (5.0-10.2)   |
| 6                      | North Slope Borough, Alaska                                | 6.7 (4.6-10.9)   |
| 7                      | Rockland County, New York                                  | 6.8 (5.6-10.7)   |
| 8                      | Williamson County, Texas                                   | 6.8 (5.6-10.8)   |
| 9                      | San Francisco County, California                           | 6.9 (5.7-10.8)   |
| 10                     | Kusilvak Census Area, Alaska                               | 6.9 (4.9-11.4)   |
| 3,101                  | Holmes County, Mississippi                                 | 19.7 (15.7-29.5) |
| 3,102                  | Hampton County, South Carolina                             | 19.9 (16.1-30.2) |
| 3,103                  | Wilcox County, Alabama                                     | 20.0 (15.6-30.2) |
| 3,104                  | Coahoma County, Mississippi                                | 20.0 (16.2-30.6) |
| 3,105                  | Perry County, Alabama                                      | 20.4 (16.1-30.7) |
| 3,106                  | Phillips County, Arkansas                                  | 21.6 (17.4-32.3) |
| 3,107                  | Sharkey County, Mississippi                                | 21.8 (16.8-32.5) |
| 3,108                  | Macon County, Alabama                                      | 22.4 (18.1-33.1) |
| 3,109                  | Loving County, Texas                                       | 23.7 (14.6-40.4) |
| 3,110                  | Madison County, Mississippi                                | 24.0 (19.6-36.3) |
|                        | Difference between highest and lowest county               | 338%             |

**eTable 4: Counties with the lowest and highest age-standardized mortality rate in 2014, by cause of death (continued).**

| Rank                                         | County                                                     | Rate*            |
|----------------------------------------------|------------------------------------------------------------|------------------|
| <b>Pancreatic cancer</b>                     |                                                            |                  |
| 1                                            | Summit County, Colorado                                    | 5.7 (5.0-6.5)    |
| 2                                            | Pitkin County, Colorado                                    | 6.5 (5.7-7.3)    |
| 3                                            | Presidio County, Texas                                     | 7.4 (6.4-8.4)    |
| 4                                            | Eagle County, Colorado                                     | 7.4 (6.6-8.3)    |
| 5                                            | Aleutians East Borough, Aleutians West Census Area, Alaska | 7.7 (6.1-9.6)    |
| 6                                            | Hinsdale County, Colorado                                  | 8.1 (6.5-9.9)    |
| 7                                            | San Miguel County, Colorado                                | 8.4 (7.1-9.8)    |
| 8                                            | Mono County, California                                    | 8.5 (7.6-9.4)    |
| 9                                            | Hidalgo County, Texas                                      | 8.6 (8.1-9.1)    |
| 10                                           | La Paz County, Yuma County, Arizona                        | 8.8 (8.2-9.4)    |
| 3,101                                        | Petersburg City, Virginia                                  | 18.4 (16.9-20.1) |
| 3,102                                        | Hopewell City, Virginia                                    | 18.5 (16.7-20.5) |
| 3,103                                        | Sunflower County, Mississippi                              | 18.6 (17.1-20.2) |
| 3,104                                        | Avoyelles Parish, Louisiana                                | 18.8 (17.3-20.2) |
| 3,105                                        | East Carroll Parish, Louisiana                             | 19.0 (16.9-21.2) |
| 3,106                                        | Saint Landry Parish, Louisiana                             | 19.1 (17.7-20.5) |
| 3,107                                        | Coahoma County, Mississippi                                | 19.2 (17.7-20.7) |
| 3,108                                        | Holmes County, Mississippi                                 | 19.3 (17.7-21.1) |
| 3,109                                        | Madison County, Mississippi                                | 20.5 (19.2-22.0) |
| 3,110                                        | Union County, Florida                                      | 22.8 (20.4-25.4) |
| Difference between highest and lowest county |                                                            | 298.3%           |
| <b>Uterine cancer</b>                        |                                                            |                  |
| 1                                            | Summit County, Colorado                                    | 0.8 (0.6-1.0)    |
| 2                                            | Aleutians East Borough, Aleutians West Census Area, Alaska | 0.8 (0.5-1.1)    |
| 3                                            | Pitkin County, Colorado                                    | 0.9 (0.7-1.1)    |
| 4                                            | Storey County, Nevada                                      | 1.0 (0.7-1.3)    |
| 5                                            | Bristol Bay Borough, Alaska                                | 1.0 (0.6-1.6)    |
| 6                                            | San Miguel County, Colorado                                | 1.0 (0.8-1.3)    |
| 7                                            | Santa Rosa County, Florida                                 | 1.0 (0.8-1.2)    |
| 8                                            | Glasscock County, Texas                                    | 1.0 (0.7-1.4)    |
| 9                                            | North Slope Borough, Alaska                                | 1.1 (0.7-1.4)    |
| 10                                           | Mono County, California                                    | 1.1 (0.9-1.3)    |
| 3,101                                        | Lenoir County, North Carolina                              | 3.5 (2.9-4.0)    |
| 3,102                                        | Marlboro County, South Carolina                            | 3.5 (2.9-4.0)    |
| 3,103                                        | Allendale County, South Carolina                           | 3.5 (2.8-4.1)    |
| 3,104                                        | Portsmouth City, Virginia                                  | 3.5 (2.9-4.1)    |
| 3,105                                        | Bronx County, New York                                     | 3.6 (3.1-3.9)    |
| 3,106                                        | District of Columbia, District of Columbia                 | 3.6 (3.1-4.0)    |
| 3,107                                        | Baltimore City, Maryland                                   | 3.7 (3.1-4.1)    |
| 3,108                                        | Philadelphia County, Pennsylvania                          | 3.8 (3.2-4.1)    |
| 3,109                                        | Edgecombe County, North Carolina                           | 3.9 (3.2-4.4)    |
| 3,110                                        | Williamsburg County, South Carolina                        | 4.0 (3.4-4.7)    |
| Difference between highest and lowest county |                                                            | 419.2%           |
| <b>Kidney cancer</b>                         |                                                            |                  |
| 1                                            | Summit County, Colorado                                    | 2.1 (1.7-2.6)    |
| 2                                            | Pitkin County, Colorado                                    | 2.3 (1.9-2.8)    |
| 3                                            | New York County, New York                                  | 2.5 (2.3-2.8)    |
| 4                                            | Eagle County, Colorado                                     | 2.7 (2.2-3.2)    |
| 5                                            | Queens County, New York                                    | 2.9 (2.7-3.1)    |
| 6                                            | Collier County, Florida                                    | 2.9 (2.6-3.3)    |
| 7                                            | Arlington County, Virginia                                 | 2.9 (2.5-3.4)    |
| 8                                            | Kings County, New York                                     | 2.9 (2.7-3.2)    |
| 9                                            | Hinsdale County, Colorado                                  | 3.0 (2.3-3.8)    |

**eTable 4: Counties with the lowest and highest age-standardized mortality rate in 2014, by cause of death (continued).**

| Rank              | County                                       | Rate*            |
|-------------------|----------------------------------------------|------------------|
| 10                | San Francisco County, California             | 3.0 (2.7-3.3)    |
| 3,101             | Oglala Lakota County, South Dakota           | 8.4 (6.6-10.4)   |
| 3,102             | Anderson County, Texas                       | 8.5 (7.2-9.9)    |
| 3,103             | Todd County, South Dakota                    | 8.5 (6.5-10.7)   |
| 3,104             | Dewey County, South Dakota                   | 8.7 (6.7-10.9)   |
| 3,105             | Thurston County, Nebraska                    | 8.7 (7.0-10.6)   |
| 3,106             | Union County, Florida                        | 8.7 (6.7-10.8)   |
| 3,107             | Menominee County, Wisconsin                  | 8.7 (6.5-11.5)   |
| 3,108             | Sioux County, North Dakota                   | 9.1 (6.6-12.1)   |
| 3,109             | Loving County, Texas                         | 9.5 (6.3-13.6)   |
| 3,110             | Buffalo County, South Dakota                 | 9.7 (7.0-12.9)   |
|                   | Difference between highest and lowest county | 355.6%           |
| Liver cancer      |                                              |                  |
| 1                 | Summit County, Colorado                      | 2.3 (1.7-3.1)    |
| 2                 | Pitkin County, Colorado                      | 2.4 (1.8-3.3)    |
| 3                 | Eagle County, Colorado                       | 3.0 (2.2-3.9)    |
| 4                 | Hinsdale County, Colorado                    | 3.1 (2.2-4.3)    |
| 5                 | Billings County, North Dakota                | 3.2 (2.1-4.6)    |
| 6                 | McPherson County, Nebraska                   | 3.3 (2.2-4.8)    |
| 7                 | Routt County, Colorado                       | 3.3 (2.5-4.2)    |
| 8                 | San Miguel County, Colorado                  | 3.3 (2.3-4.7)    |
| 9                 | Wayne County, Nebraska                       | 3.5 (2.5-4.5)    |
| 10                | Steele County, North Dakota                  | 3.5 (2.3-4.9)    |
| 3,101             | Jim Hogg County, Texas                       | 14.1 (10.2-19.2) |
| 3,102             | Jim Wells County, Texas                      | 14.2 (11.4-17.6) |
| 3,103             | Webb County, Texas                           | 14.3 (12.1-16.5) |
| 3,104             | Brooks County, Texas                         | 14.6 (10.9-18.5) |
| 3,105             | Duval County, Texas                          | 15.1 (11.7-19.1) |
| 3,106             | Kusilvak Census Area, Alaska                 | 15.1 (9.4-22.2)  |
| 3,107             | Maverick County, Texas                       | 16.1 (12.9-19.7) |
| 3,108             | Zavala County, Texas                         | 16.9 (12.8-21.7) |
| 3,109             | Union County, Florida                        | 23.6 (16.9-32.0) |
| 3,110             | Anderson County, Texas                       | 37.6 (30.7-44.3) |
|                   | Difference between highest and lowest county | 1546.1%          |
| Testicular cancer |                                              |                  |
| 1                 | Gwinnett County, Georgia                     | 0.1 (0.0-0.1)    |
| 2                 | Pitkin County, Colorado                      | 0.1 (0.0-0.1)    |
| 3                 | Summit County, Colorado                      | 0.1 (0.0-0.1)    |
| 4                 | Fayette County, Georgia                      | 0.1 (0.0-0.1)    |
| 5                 | Collin County, Texas                         | 0.1 (0.0-0.1)    |
| 6                 | Loudoun County, Virginia                     | 0.1 (0.0-0.1)    |
| 7                 | Clayton County, Georgia                      | 0.1 (0.0-0.1)    |
| 8                 | Los Alamos County, New Mexico                | 0.1 (0.0-0.1)    |
| 9                 | Hinds County, Mississippi                    | 0.1 (0.0-0.1)    |
| 10                | Douglas County, Colorado                     | 0.1 (0.0-0.1)    |
| 3,101             | Kenedy County, Texas                         | 0.3 (0.1-0.5)    |
| 3,102             | Tuscola County, Michigan                     | 0.3 (0.2-0.4)    |
| 3,103             | Jim Hogg County, Texas                       | 0.3 (0.2-0.4)    |
| 3,104             | Brooks County, Texas                         | 0.3 (0.2-0.4)    |
| 3,105             | Tulare County, California                    | 0.3 (0.2-0.4)    |
| 3,106             | Stanislaus County, California                | 0.3 (0.2-0.4)    |
| 3,107             | Imperial County, California                  | 0.3 (0.2-0.4)    |
| 3,108             | Willacy County, Texas                        | 0.3 (0.2-0.5)    |
| 3,109             | Cameron County, Texas                        | 0.3 (0.2-0.5)    |
| 3,110             | Union County, Florida                        | 0.7 (0.4-1.0)    |
|                   | Difference between highest and lowest county | 1015.7%          |

**eTable 4: Counties with the lowest and highest age-standardized mortality rate in 2014, by cause of death (continued).**

| Rank                                         | County                                                     | Rate*            |
|----------------------------------------------|------------------------------------------------------------|------------------|
| Non-Hodgkin lymphoma                         |                                                            |                  |
| 1                                            | Summit County, Colorado                                    | 3.9 (3.2-4.7)    |
| 2                                            | Aleutians East Borough, Aleutians West Census Area, Alaska | 4.0 (2.5-5.8)    |
| 3                                            | Pitkin County, Colorado                                    | 4.2 (3.4-5.2)    |
| 4                                            | Hinsdale County, Colorado                                  | 4.7 (3.6-6.1)    |
| 5                                            | Presidio County, Texas                                     | 4.9 (3.7-6.3)    |
| 6                                            | Eagle County, Colorado                                     | 5.2 (4.3-6.2)    |
| 7                                            | San Miguel County, Colorado                                | 5.4 (4.1-6.7)    |
| 8                                            | Mineral County, Colorado                                   | 5.4 (4.0-7.0)    |
| 9                                            | Los Alamos County, New Mexico                              | 5.5 (4.4-6.9)    |
| 10                                           | Mono County, California                                    | 5.5 (4.6-6.6)    |
| 3,101                                        | Terrebonne Parish, Louisiana                               | 11.2 (9.4-13.3)  |
| 3,102                                        | Bartholomew County, Indiana                                | 11.2 (9.6-13.2)  |
| 3,103                                        | Madison County, Mississippi                                | 11.2 (9.5-13.2)  |
| 3,104                                        | Harrison County, Ohio                                      | 11.3 (9.3-13.6)  |
| 3,105                                        | Nicholas County, Kentucky                                  | 11.3 (9.1-14.0)  |
| 3,106                                        | Fayette County, Indiana                                    | 11.3 (9.4-13.4)  |
| 3,107                                        | Powell County, Kentucky                                    | 11.4 (9.2-14.1)  |
| 3,108                                        | McLean County, Kentucky                                    | 11.5 (9.4-14.2)  |
| 3,109                                        | Hopkins County, Kentucky                                   | 11.6 (9.6-14.0)  |
| 3,110                                        | Union County, Florida                                      | 15.8 (12.4-20.5) |
| Difference between highest and lowest county |                                                            | 306.3%           |

\*Rates are given in deaths per 100,000 population. Numbers in parentheses indicate 95% uncertainty intervals. All rates are for both sexes combined.
